# Supplementary material for: A pH-responsive soluble polymer-based homogeneous system for fast and highly efficient N-glycoprotein/glycopeptide enrichment and identification by mass spectrometry
Source: Chem Sci. 2015 May 26;6(7):4234–41. doi: 10.1039/c5sc00396b (PMC5707513; doi:10.1039/c5sc00396b)
Supplement: Supplementary file 1 [file SC-006-C5SC00396B-s001.xlsx]

## Sheet: Test 1
N-glycopeptides identified from mouse brain after poly-(AA-co-hydrazide) enrichment
N-glycopeptide Sequence	Peptide Confidence	Protein Group Accessions	Modifications	IonScore	Charge	MH+ [Da]	ΔM [ppm]
GSQGQFPLTQnVTVVEGGTAILTcR	High	225543375	N11(Deamidated); C24(Carbamidomethyl)	144.97	2	2634.35	9.85108
LLAnSSmLGEGQVLR	High	357588422	N4(Deamidated); M7(Oxidation)	131.11	2	1604.84	2.37302
VSLTnVSISDEGR	High	71040107	N5(Deamidated)	130.11	2	1377.69	2.59803
GKAnSTGTLVITNPTR	High	227497226	N4(Deamidated)	128.38	2	1630.88	2.14291
LEDFNYNnQTITDQIYR	High	131888529	N8(Deamidated)	126.55	2	2148	4.55914
YTcTAQTIVDnSSASADLVVR	High	227497226	C3(Carbamidomethyl); N11(Deamidated)	125.07	2	2272.09	4.17663
TLAGEnQTALEIEELNR	High	153791270	N6(Deamidated)	122.44	2	1901.95	3.24627
VINFYAGAnQSmnVTcVGK	High	7242138	N9(Deamidated); M12(Oxidation); N13(Deamidated); C16(Carbamidomethyl)	113.86	2	2090.97	6.16614
SPQSnGTSGVEQIcVDVR	High	295789082	N5(Deamidated); C14(Carbamidomethyl)	111.83	2	1933.9	4.95249
TVVAPSTEGGLnLTSTFLR	High	119226208	N12(Deamidated)	111.17	2	1964.04	2.6255
LDWLGncSGLNDDSYGYR	High	6753138	N6(Deamidated); C7(Carbamidomethyl)	109.1	2	2105.89	3.37589
NSmTPGNLSPGIYLcnATNR	High	159110562	M3(Oxidation); C15(Carbamidomethyl); N16(Deamidated)	109.04	2	2197.01	3.86749
TQLTcSLnSSGVDIVGHR	High	116014342	C5(Carbamidomethyl); N8(Deamidated)	106.7	2	1944.96	5.74445
HLYTTTGGETDFTnVTSLR	High	34610211	N14(Deamidated)	105.95	2	2114.01	5.3088
KEnGVFEEISnSSGR	High	153945724	N3(Deamidated); N11(Deamidated)	105.01	2	1654.76	3.45353
GcmESINYnGVnITDLAR	High	165377150	C2(Carbamidomethyl); M3(Oxidation); N9(Deamidated); N12(Deamidated)	104.91	2	2044.91	4.92769
DPAGWLSINPInGTVDTTAVLDR	High	110625609	N12(Deamidated)	103.18	2	2426.23	2.15477
TSDTGEEEAITnSTEAnGK	High	116014342	N12(Deamidated); N17(Deamidated)	102.3	2	1955.83	4.6353
DAmVGnYTcEVTELSR	High	6754382	M3(Oxidation); N6(Deamidated); C9(Carbamidomethyl)	101.56	2	1861.8	1.97923
IGPGEPLELLcnVSGALPPPGR	High	32189434	C11(Carbamidomethyl); N12(Deamidated)	101.4	2	2244.18	3.94753
GTnESEASSTQFTTEIDAPK	High	226958549	N3(Deamidated)	100.66	2	2113.95	2.70277
LmNAPLYLAEWQnITK	High	238637279	M2(Oxidation); N13(Deamidated)	99.64	2	1921.98	4.72892
DEGDYFcELQVSGANPmSSnK	High	6678347	C7(Carbamidomethyl); M17(Oxidation); N20(Deamidated)	98.92	2	2364.97	5.44336
VINFYAGANQSmnVTcVGK	High	7242138	M12(Oxidation); N13(Deamidated); C16(Carbamidomethyl)	98.76	2	2089.97	2.84329
IDVNSWIEnFTK	High	161086902	N9(Deamidated)	96.88	2	1466.72	2.7375
VTQQSPTSmNQVnLTcR	High	294997315	M9(Oxidation); N13(Deamidated); C16(Carbamidomethyl)	96.52	2	1980.92	2.46404
VGmDGTnQSVVIETK	High	153792247	M3(Oxidation); N7(Deamidated)	94.75	2	1594.77	2.77111
ITnVSEEDSGEYFcLASNK	High	237858632;35215309	N3(Deamidated); C14(Carbamidomethyl)	94.39	2	2163.94	0.459146
VGVNKnQTVTATFGYPFR	High	41282044	N6(Deamidated)	93.32	2	2000.03	5.03077
nSmTPGNLSPGIYLcnATNR	High	159110562	N1(Deamidated); M3(Oxidation); C15(Carbamidomethyl); N16(Deamidated)	92.45	2	2198	4.69554
mTQESALIFPFLnK	High	16716503	M1(Oxidation); N13(Deamidated)	92.42	2	1655.84	1.25703
WYSAGLASnSSWFR	High	119226208	N9(Deamidated)	92.21	2	1632.75	4.33685
GVLmVGnETTYEDGHGAR	High	312596932	M4(Oxidation); N7(Deamidated)	91.23	2	1922.86	1.80655
NTDGTYnYTSLFLVnSSAHR	High	294997315	N7(Deamidated); N15(Deamidated)	90.1	2	2262.04	5.10369
TILVDNNTWnNTHISR	High	148747128	N10(Deamidated)	89.77	2	1898.94	3.86604
THnLTNLNPDLQYR	High	112293279	N3(Deamidated)	89.67	2	1699.85	3.31753
ISnVTPADAGIYYcVK	High	294997315	N3(Deamidated); C14(Carbamidomethyl)	89.45	2	1771.86	3.75076
DLQGNPIAnATISVDGIDHDVTSAK	High	22203763	N9(Deamidated)	89.34	2	2552.26	5.36417
IVSPEPGGAAGPnLTcR	High	357588422	N13(Deamidated); C16(Carbamidomethyl)	89.27	2	1696.84	2.26182
TVYLHAnQTGYPDPSSR	High	116875858	N7(Deamidated)	88.76	2	1906.9	2.60607
LFnGQQGIIIQnFSTR	High	28893343	N3(Deamidated); N12(Deamidated)	88.37	2	1837.95	2.93334
LDPPcTnTTAPSNYLNNPYVR	High	84042523	C5(Carbamidomethyl); N7(Deamidated)	88.31	2	2408.13	6.66156
IDSTGnVTNELR	High	87299635	N6(Deamidated)	87.36	2	1319.65	1.8797
ESGAnVTGFQLVnYTDTIPAR	High	164664512	N5(Deamidated); N13(Deamidated)	86.68	2	2255.1	5.88514
SDVPNTSPnSTSQHVAEFETER	High	124486807	N9(Deamidated)	86	2	2433.09	3.49899
FLEPYnDSIQAQK	High	7242138	N6(Deamidated)	85.45	2	1553.75	1.93146
VLTNNPYnDSSLR	High	237858632	N8(Deamidated)	85.4	2	1493.73	2.34501
LFALnNTTGLITVQR	High	422744224	N5(Deamidated)	85.07	2	1661.93	2.42355
LEPNSVDPEnITEILIANQK	High	6679150	N10(Deamidated)	84.87	2	2238.17	6.70163
TSDTGEEEAITnSTEANGK	High	116014342	N12(Deamidated)	84.53	2	1954.84	4.14177
AAEDWTENPEPFnASFYR	High	291290989	N13(Deamidated)	84.53	2	2144.93	5.94114
EETLLYDnATSSVADR	High	27370240	N8(Deamidated)	84.5	2	1784.82	2.8623
ALPGGTDnASAASAAGGSGPQR	High	36054013	N8(Deamidated)	84.34	2	1913.9	2.07117
VIEEFYnQTWNHR	High	165377226	N7(Deamidated)	83.89	2	1736.81	2.75529
VGGPAPSPSVLnVTGVTQR	High	68989243	N12(Deamidated)	83.31	2	1836.99	4.6492
VAGnQTSAVLR	High	117938277	N4(Deamidated)	83.21	2	1116.6	1.47527
IYAGmVSLmDEAVGnVTK	High	125656171	M5(Oxidation); M9(Oxidation); N15(Deamidated)	83.2	2	1930.92	3.91779
AGFEYAFDQLQNSnITR	High	291290989	N14(Deamidated)	83.07	2	1974.93	4.18777
AnATLLLGPLR	High	40789268	N2(Deamidated)	82.69	2	1139.68	1.64615
VDGQLVnLTLVEFR	High	116063560	N7(Deamidated)	82.38	2	1603.87	3.03744
NnEGGVIAQLPSDVTSFnQTGLKPGEEYIVNVVALK	High	226958549	N2(Deamidated); N18(Deamidated)	82.34	3	3803.97	11.8343
VSVVnSTLAEVHWDPVPPK	High	225637535	N5(Deamidated)	82.15	2	2075.09	4.34393
LDPVSLQILQTWnTSYPK	High	84370353	N13(Deamidated)	82.13	2	2104.1	3.16691
FAEInGSALcSYNIKPSEYTLTSK	High	227499988	N5(Deamidated); C10(Carbamidomethyl)	81.84	3	2694.3	2.84534
FAnYSImNLQNR	High	294997259	N3(Deamidated); M7(Oxidation)	81.75	2	1487.7	3.58173
FLnVTPNVEVNVEcR	High	7242138	N3(Deamidated); C14(Carbamidomethyl)	81.67	2	1790.88	1.88163
VLnSTAISLQWNR	High	237858632	N3(Deamidated)	81.61	2	1502.8	3.06198
FEnQTcFPLPDSR	High	197333685	N3(Deamidated); C6(Carbamidomethyl)	81.15	2	1611.72	3.11259
GETASLLcnISVR	High	32189434	C8(Carbamidomethyl); N9(Deamidated)	81.09	2	1420.71	2.58421
LFNGQQGIIIQnFSTR	High	28893343	N12(Deamidated)	80.98	2	1836.97	4.13497
LAWEGnETVTTR	High	158711686	N6(Deamidated)	80.95	2	1377.67	3.49273
ENScmVYnDTTmVcR	High	6679389	C4(Carbamidomethyl); M5(Oxidation); N8(Deamidated); M12(Oxidation); C14(Carbamidomethyl)	80.84	2	1912.73	7.52545
VQnmSQSIEVLDR	High	84370353	N3(Deamidated); M4(Oxidation)	80.69	2	1535.74	3.60022
SGGnATLQVDSWPVIER	High	226958327	N4(Deamidated)	80.18	2	1829.91	3.52042
GSQGQFPLTQnVTVVEGGTAILTcR	High	225543375	N11(Deamidated); C24(Carbamidomethyl)	80.14	2	2635.35	18.3212
ENGVFEEISnSSGR	High	153945724	N10(Deamidated)	80.06	2	1525.68	2.54983
TAADATGLQPILNQFTPAnVSR	High	154240716	N19(Deamidated)	80.01	2	2286.19	7.19763
GcmESInYnGVnITDLAR	High	165377150	C2(Carbamidomethyl); M3(Oxidation); N7(Deamidated); N9(Deamidated); N12(Deamidated)	79.69	2	2045.91	12.6783
SLEVLnLSSNK	High	226874869	N6(Deamidated)	79.61	2	1204.65	2.64136
TDcDSSTASLcSFPVAnVSLAK	High	236465189	C3(Carbamidomethyl); C11(Carbamidomethyl); N17(Deamidated)	79.6	2	2331.06	7.28581
LAVTnTTmTGTVLK	High	31981983	N5(Deamidated); M8(Oxidation)	79.53	2	1466.78	2.3336
LEnLSSTESGYTATLTR	High	226693369	N3(Deamidated)	79.44	2	1843.9	3.62923
VQnVSQSmEVLELR	High	148747133	N3(Deamidated); M8(Oxidation)	79.13	2	1648.82	2.19085
LLnATcDEYFTR	High	158711686	N3(Deamidated); C6(Carbamidomethyl)	79.12	2	1503.68	0.353385
VIDLWDLAQSAnFTEK	High	63999380	N12(Deamidated)	78.78	2	1850.92	3.76167
AFInGTGLETVISR	High	153792247	N4(Deamidated)	78.66	2	1478.79	2.1966
SGGnATLQVDSWPVNER	High	327365337	N4(Deamidated)	78.65	2	1830.87	2.1197
ATQLFTnQTDIPNmEDVYAVK	High	9938002	N7(Deamidated); M14(Oxidation)	78.13	2	2415.15	4.52534
NPcTSEQncTSPFSYK	High	45504394	C3(Carbamidomethyl); N8(Deamidated); C9(Carbamidomethyl)	77.88	2	1920.77	-1.48982
LTWSNAnGTASYR	High	208609941	N7(Deamidated)	77.54	2	1441.68	3.23462
FQLLnFSSSELK	High	71040107	N5(Deamidated)	77.26	2	1413.73	2.27649
LTScATnASmcGDEAR	High	124494256	C4(Carbamidomethyl); N7(Deamidated); M10(Oxidation); C11(Carbamidomethyl)	77.04	2	1760.69	1.19218
AGPnGTLFVVDAYK	High	21313668	N4(Deamidated)	76.88	2	1452.74	3.86442
TAnETSAEAYNLLLR	High	153791270	N3(Deamidated)	76.66	2	1666.83	3.13552
AVISmLnETmNEAPEETK	High	7106409	M5(Oxidation); N7(Deamidated); M10(Oxidation)	76.5	2	2039.92	0.760882
TnTSALLYDSLR	High	359807089	N2(Deamidated)	76.28	2	1354.69	3.19578
FKLDWLGncSGLNDDSYGYR	High	6753138	N8(Deamidated); C9(Carbamidomethyl)	76.19	2	2381.06	4.08847
YPGIFnSTTSDAFLQSK	High	31543926	N6(Deamidated)	75.71	2	1876.91	4.81953
LTGALAGGGSAAGTSAnATK	High	223633888	N17(Deamidated)	75.32	2	1676.85	2.00911
ALLTnVSSVALGSR	High	237874245	N5(Deamidated)	75.04	2	1388.78	3.79714
LEDFNYnnQTITDQIYR	High	131888529	N7(Deamidated); N8(Deamidated)	75.01	2	2148.99	9.95001
GSQGQFPLTQnVTVVEGGTAILTcR	High	225543375	N11(Deamidated); C24(Carbamidomethyl)	75.01	2	2636.34	19.747
GIAnLSNFIR	High	294997315	N4(Deamidated)	74.79	2	1105.6	2.48145
FHVnYTQPLVAVK	High	7242138	N4(Deamidated)	74.73	2	1516.82	2.14402
YTcTAQTIVDnSSASADLVVR	High	227497226	C3(Carbamidomethyl); N11(Deamidated)	74.43	2	2273.08	10.5622
APDSnSSSLLITTR	High	31560063	N5(Deamidated)	74.17	2	1462.74	3.26398
LSDTAnYTcVAK	High	6678505	N6(Deamidated); C9(Carbamidomethyl)	73.21	2	1343.62	3.26501
DnATQEEILHYLEK	High	225735655	N2(Deamidated)	72.87	2	1703.82	3.71155
GELnSTLFSSRPK	High	13385294	N4(Deamidated)	72.78	2	1436.74	1.89523
nSTKEEILAALEK	High	225735655	N1(Deamidated)	72.73	2	1446.77	1.96622
ISPGKnATGmEVGWYR	High	113199771	N6(Deamidated); M10(Oxidation)	72.67	2	1782.85	1.59597
TcVSncTASQFVcK	High	124494256	C2(Carbamidomethyl); N5(Deamidated); C6(Carbamidomethyl); C13(Carbamidomethyl)	72.49	2	1662.69	1.44723
ALGYEnATQALGR	High	6755144	N6(Deamidated)	72.44	2	1364.69	3.35527
LIPLGVFTGLSnLTK	High	30841016	N12(Deamidated)	72.09	2	1573.93	3.44066
DEDAENLGHFVmFPAnGSIDLmYFPYYGK	High	7242138	M12(Oxidation); N16(Deamidated); M22(Oxidation)	72.03	3	3373.48	3.40345
DITNLInNTFIR	High	34610211	N7(Deamidated)	72	2	1434.76	3.01919
SSPDTQDLYcLnESSK	High	6679150	C10(Carbamidomethyl); N12(Deamidated)	72	2	1844.79	4.45983
VIcTGPnDTSPGSPR	High	294997259	C3(Carbamidomethyl); N7(Deamidated)	71.85	2	1558.72	0.1111
HEnnTKDNSIQHEFSLTR	High	6678347	N3(Deamidated); N4(Deamidated)	71.85	2	2172.01	8.82526
VVLGEnLTSNcPEVIYEIK	High	9055376	N6(Deamidated); C11(Carbamidomethyl)	71.78	2	2178.11	4.3484
FFPYAnGTLSIR	High	112293279	N6(Deamidated)	71.52	2	1386.71	2.00339
FnSTEYQVVTR	High	124494256	N2(Deamidated)	71.32	2	1344.65	1.67626
EQLFFnLSDPELR	High	112293279	N6(Deamidated)	71.21	2	1608.8	3.39306
SLWnmSAANnNIK	High	226874869	N4(Deamidated); M5(Oxidation); N10(Deamidated)	71.2	2	1480.68	1.57677
VLVAPPSEEAnTTK	High	7106409	N11(Deamidated)	71.11	2	1456.75	-0.376382
GTEWLVnSSR	High	227497226	N7(Deamidated)	70.81	2	1149.55	1.15686
NPEAGVATTDLYGncTLR	High	6679229	N14(Deamidated); C15(Carbamidomethyl)	70.53	2	1952.9	0.995898
TPAGDLAFNQcPLnATGTTSR	High	169790905	C11(Carbamidomethyl); N14(Deamidated)	70.49	2	2193.03	2.58157
AFNISPnDTSSGScGINLVTLK	High	113195678	N7(Deamidated); C14(Carbamidomethyl)	70.47	2	2296.12	2.31531
ncTLLLSTLSPELGGK	High	6754614	N1(Deamidated); C2(Carbamidomethyl)	70.25	2	1703.89	1.35183
ISTLTFFnVSEK	High	51092272	N8(Deamidated)	70.19	2	1386.72	2.52267
NNmEITWTPmnATSAFGPNLR	High	237858632;35215309	M3(Oxidation); M10(Oxidation); N11(Deamidated)	70.14	2	2398.08	1.85027
YSGVnLTGFR	High	124487364	N5(Deamidated)	70.03	2	1114.55	1.7476
YTGnASALLILPDQGR	High	309267120	N4(Deamidated)	69.85	2	1689.89	3.44692
VTNSnANAAGPLIVAGYnVSGSVR	High	227908803	N5(Deamidated); N18(Deamidated)	69.78	2	2333.2	10.613
GHnATFFGNVnDSAVVR	High	116063560	N3(Deamidated); N11(Deamidated)	69.64	2	1806.85	2.69712
FGnLTYLnLTK	High	30425288	N3(Deamidated); N8(Deamidated)	69.53	2	1285.67	2.78828
FInSTFLEQK	High	157909825	N3(Deamidated)	69.11	2	1227.63	2.11312
IAPASnVSHTVVLRPLK	High	13384850	N6(Deamidated)	69.08	2	1803.05	3.10118
YQLGTSPYVYQLTTRPVTDGQPHSVnITR	High	116063560	N26(Deamidated)	68.97	3	3292.67	4.18803
NKVnYSYTAVQIPTDIYK	High	291290989	N4(Deamidated)	68.68	2	2118.08	3.14981
NmAnGQPHSVnITR	High	165377150	M2(Oxidation); N4(Deamidated); N11(Deamidated)	68.56	2	1556.71	0.678439
AYNTAGTGPSSLPVnVTTK	High	31980846	N15(Deamidated)	68.09	2	1878.95	3.55523
GcmESINYNGVnITDLAR	High	165377150	C2(Carbamidomethyl); M3(Oxidation); N12(Deamidated)	68.08	2	2043.92	3.44051
VWDTAAALnR	High	254588052	N9(Deamidated)	67.58	2	1117.57	2.12993
NnVTEIQGIPGAASGLIK	High	158711686	N2(Deamidated)	67.37	2	1782.97	3.46087
NTDGTYnYTSLFLVNSSAHR	High	294997315	N7(Deamidated)	67.37	2	2261.05	1.92381
NLINDYVSnQTQGmIK	High	309267120	N9(Deamidated); M14(Oxidation)	67.35	2	1854.9	3.17725
TLFLFPnQTGFPSK	High	157951690	N7(Deamidated)	67.34	2	1597.83	1.73218
ALAGLVYnSSGTEPcYDIYR	High	31981425	N8(Deamidated); C15(Carbamidomethyl)	67.28	2	2250.05	4.11712
VLTLAnFTTK	High	6678347	N6(Deamidated)	67.18	2	1108.62	-0.304867
AFSTLLVnVSGK	High	28893491	N8(Deamidated)	67.09	2	1236.69	2.88838
nQTVTATFGYPFR	High	41282044	N1(Deamidated)	67.02	2	1502.73	2.67886
GYnVTYWWK	High	112293279	N3(Deamidated)	66.45	2	1217.57	3.25947
FAVLANNNLQILNInK	High	6754920	N15(Deamidated)	66.18	2	1800	1.7772
SInVTGQGFSLIQK	High	226958476	N3(Deamidated)	66.17	2	1492.8	2.49302
SnGSEnNVLESQAGIQK	High	6680091	N2(Deamidated); N6(Deamidated)	65.58	2	1776.86	17.6161
IAnISmEVGR	High	117168301	N3(Deamidated); M6(Oxidation)	65.4	2	1106.55	1.40762
ELLSnQSEVmLR	High	58037273	N5(Deamidated); M10(Oxidation)	65.33	2	1435.71	2.27622
DYGnYTcVATNK	High	51092272	N4(Deamidated); C7(Carbamidomethyl)	65.22	2	1406.59	3.19659
EASnHSSGAGLVQINK	High	14916479	N4(Deamidated)	65.2	2	1612.79	1.0862
FVSnQTmYYSWEGnPInIScDVTANPPASIHWR	High	6754920	N4(Deamidated); M7(Oxidation); N14(Deamidated); N17(Deamidated); C20(Carbamidomethyl)	65.19	3	3874.77	17.8163
LNKFLEPYnDSIQAQK	High	7242138	N9(Deamidated)	65	2	1908.98	4.10567
QGnASDVILR	High	58037273	N3(Deamidated)	64.94	2	1073.56	1.50058
SISnmTSQEFVEK	High	131888529	N4(Deamidated); M5(Oxidation)	64.81	2	1516.69	1.29372
TTLVDNNTWnNSHIALVGK	High	61651673	N10(Deamidated)	64.81	2	2098.07	4.42509
QEnISVGSVLLTVNATDPDSLQHQTIR	High	110625609	N3(Deamidated)	64.67	3	2938.5	11.7029
SDVPnTSPNSTSQHVAEFETER	High	124486807	N5(Deamidated)	64.64	2	2434.11	18.3891
LSGnLTLLR	High	6679389	N4(Deamidated)	64.63	2	987.585	2.03268
ANELcAAESncSSR	High	84662783	C5(Carbamidomethyl); N10(Deamidated); C11(Carbamidomethyl)	64.58	2	1569.63	0.630669
IQDFnYTDHTLGR	High	124487263	N5(Deamidated)	64.49	2	1580.74	2.8111
AVISmLnETmnEAPEETK	High	7106409	M5(Oxidation); N7(Deamidated); M10(Oxidation); N11(Deamidated)	64.44	2	2040.9	2.31209
AFYnGSLTAQIVK	High	6679995	N4(Deamidated)	64.32	2	1412.75	2.71805
VInDTWAWK	High	157951706	N3(Deamidated)	64.23	2	1133.57	2.82842
LnGTDPIVAADSK	High	124494256	N2(Deamidated)	64.23	2	1301.66	2.88068
EEnATIATYPEFGVLDLK	High	6680744	N3(Deamidated)	64.2	2	2011	3.24351
KFHVnYTQPLVAVK	High	7242138	N5(Deamidated)	64.18	2	1644.92	3.61012
LAYATInDSR	High	312032384	N7(Deamidated)	63.99	2	1124.56	1.52666
WTGHnVTVVQR	High	124494256	N5(Deamidated)	63.97	2	1297.67	2.567
ncTIESTTFYNTDLYK	High	157909825	N1(Deamidated); C2(Carbamidomethyl)	63.77	2	1970.88	3.83031
DVGSGTTnNSQAcAQFLEQYFHnSDLTEFmR	High	6753448	N8(Deamidated); C13(Carbamidomethyl); N23(Deamidated); M30(Oxidation)	63.74	3	3585.55	7.96953
SVSVAAGDSTVLncTLTSLLPVGPIR	High	294997315	N13(Deamidated); C14(Carbamidomethyl)	63.61	2	2628.4	4.45231
TVVTEAGNLLKDnATQEEILHYLEK	High	225735655	N13(Deamidated)	63.59	3	2829.46	2.24273
SLWnmSAANNNIK	High	226874869	N4(Deamidated); M5(Oxidation)	63.51	2	1479.69	2.40766
KVLVAPPSEEAnTTK	High	7106409	N12(Deamidated)	63.5	2	1584.85	0.193646
FVSQTNGNLYIAnVESSDRGnYScFVSSPSITK	High	227497226	N13(Deamidated); N21(Deamidated); C24(Carbamidomethyl)	63.42	3	3644.7	7.7872
GLmVGnGSVLGVVQAVDAETGK	High	172073152	M3(Oxidation); N6(Deamidated)	63.23	2	2118.08	4.68447
VPGADTQYFVYSnDSIHPYTPFEVK	High	54607084	N13(Deamidated)	63.13	3	2875.35	2.98161
AEPPLnASAGDQEEK	High	157951706	N6(Deamidated)	62.55	2	1556.71	0.555224
NITAFnETLFR	High	11596855	N6(Deamidated)	62.52	2	1326.67	2.46439
IQFGGAnVSGFQIVDYDDSLVSK	High	85861220	N7(Deamidated)	62.49	2	2461.21	12.6044
SmVDFmNTDnFTSHR	High	84370353	M2(Oxidation); M6(Oxidation); N10(Deamidated)	62.38	2	1834.74	4.16476
GnYScFVSSPSITK	High	227497226	N2(Deamidated); C5(Carbamidomethyl)	62.26	2	1547.71	1.15474
AnSTGTLVITNPTR	High	227497226	N2(Deamidated)	62.21	2	1445.76	-0.210566
YnLSEVLQGK	High	295390633	N2(Deamidated)	62.09	2	1151.6	3.15274
TYcANEPLSncSQVnR	High	8393787	C3(Carbamidomethyl); N10(Deamidated); C11(Carbamidomethyl); N15(Deamidated)	61.94	2	1914.8	2.60888
LIASnITETmR	High	89242146	N5(Deamidated); M10(Oxidation)	61.72	2	1265.64	2.91741
SLDNDNYVFTAPYFnK	High	161086902	N15(Deamidated)	61.62	2	1908.87	3.87497
VAFVLYnNLGPYLSTEnASmK	High	58037543	N7(Deamidated); N17(Deamidated); M20(Oxidation)	61.45	2	2349.16	10.872
AEFAVAnDTGFVDIPQQEK	High	6753558	N7(Deamidated)	61.43	2	2080	4.1374
LVDnGTLLYTmR	High	247269171	N4(Deamidated); M11(Oxidation)	61.2	2	1412.71	3.35554
LAYSGIPLnLTLDNR	High	6679911	N9(Deamidated)	60.88	2	1660.9	3.32134
VLTNQESPYQnHTGR	High	124286805	N11(Deamidated)	60.88	2	1744.83	2.40818
NTNDNIQEcFnTTK	High	156105683	C9(Carbamidomethyl); N11(Deamidated)	60.77	2	1699.73	2.34917
EnGVFEEISnSSGR	High	153945724	N2(Deamidated); N10(Deamidated)	60.73	2	1526.66	2.06371
SPQSnGTSGVEQIcVDVR	High	295789082	N5(Deamidated); C14(Carbamidomethyl)	60.61	2	1934.9	11.0658
EIcSGnSSQcAPNVHK	High	56790900	C3(Carbamidomethyl); N6(Deamidated); C10(Carbamidomethyl)	60.32	2	1788.77	1.80807
LTPLEQYEQKVnASAPR	High	85861186	N12(Deamidated)	60.23	2	1945.01	5.39936
IETILLnGTDR	High	124494256	N7(Deamidated)	60.09	2	1245.67	2.88956
AAnYTSSLNLPDK	High	49274623	N3(Deamidated)	60.06	2	1394.68	2.02016
GTAGNALmDGASQLVGEnR	High	33859809	M8(Oxidation); N18(Deamidated)	59.97	2	1877.87	2.73021
LVnSTFLHNK	High	11528518	N3(Deamidated)	59.89	2	1173.63	1.54398
FLEQQNQVLQTKWELLQQVnTSTR	High	51092293	N20(Deamidated)	59.79	3	2932.53	4.88231
VELVPLPSWQPVGEnFTLScR	High	159110562	N15(Deamidated); C20(Carbamidomethyl)	59.53	2	2429.22	2.82117
VTQQSPTSmnQVnLTcR	High	294997315	M9(Oxidation); N10(Deamidated); N13(Deamidated); C16(Carbamidomethyl)	59.49	2	1981.91	9.41908
FINYnQTVSR	High	85861260	N5(Deamidated)	59.16	2	1242.61	1.58661
SLQDAATQLNTnLSSVR	High	254675312	N12(Deamidated)	59.16	2	1818.92	2.19804
EQTVSDPFLVVSnTSTFVPYEIK	High	112293279	N13(Deamidated)	59.01	2	2601.31	6.0179
AYnSAGTGPSSATVnVTTR	High	157909807	N3(Deamidated); N15(Deamidated)	58.97	2	1855.89	13.3391
LSALDNLLnHSSIFLK	High	157951706	N9(Deamidated)	58.75	2	1785.98	5.70638
VLQPLSSTSLYVcGTNAFQPTcDHLnLTSFK	High	49274623	C13(Carbamidomethyl); C22(Carbamidomethyl); N26(Deamidated)	58.65	3	3501.71	16.8727
QnITYLLK	High	226874869	N2(Deamidated)	58.59	2	993.563	1.62108
YYnYTLSInGK	High	29789239	N3(Deamidated); N9(Deamidated)	58.42	2	1337.63	2.22076
VPFIFNINPATTnFTGScQPQSAQLR	High	31543108	N13(Deamidated); C18(Carbamidomethyl)	58.31	3	2909.44	4.16531
InYTINImELK	High	85861220	N2(Deamidated); M8(Oxidation)	58.27	2	1368.71	4.15598
SVLEnTTSYEEAK	High	9790019	N5(Deamidated)	58.24	2	1471.68	2.03959
ATQLFTnQTDIPNmEDVYAVK	High	9938002	N7(Deamidated); M14(Oxidation)	58.23	2	2416.16	15.1807
AVQLnETLGNQDK	High	117647249	N5(Deamidated)	58.16	2	1430.72	2.20332
TnSSFIQGFVDHVK	High	225735655	N2(Deamidated)	58.16	2	1579.78	3.80953
IcTLVHTAmDSPmDLIATnITPTEALLQWK	High	226958549	C2(Carbamidomethyl); M9(Oxidation); M13(Oxidation); N19(Deamidated)	58.16	3	3416.7	6.4353
WSYnNSETSR	High	61656194	N4(Deamidated)	57.96	2	1244.52	1.29325
YTSDPnVTSVGPSK	High	225690610	N6(Deamidated)	57.9	2	1452.69	1.44438
GEnFTETDVK	High	506326231	N3(Deamidated)	57.81	2	1140.51	1.14531
VnSSLHSQISR	High	153791270	N2(Deamidated)	57.81	2	1228.63	2.30311
GQVVTmDGTPLVGVnVSFVK	High	154090989	M6(Oxidation); N15(Deamidated)	57.79	2	2064.08	6.92067
HAPDIPDDSTDnITIFTR	High	247269171	N12(Deamidated)	57.74	2	2028.96	2.88691
DYYPInESLASLPLR	High	103472025	N6(Deamidated)	57.51	2	1751.89	4.08827
FAVLANnNLQILNInK	High	6754920	N7(Deamidated); N15(Deamidated)	57.5	2	1800.99	0.687753
AFnLTWISTDFK	High	170172540	N3(Deamidated)	57.49	2	1443.72	2.52577
VLKDAVNnITAK	High	161086902	N8(Deamidated)	57.36	2	1286.74	2.92973
IIISPEEnVTLTcTAENQLER	High	31791059	N8(Deamidated); C13(Carbamidomethyl)	57.05	2	2431.21	4.71754
ETVPSnTTccAR	High	38016190	N6(Deamidated); C9(Carbamidomethyl); C10(Carbamidomethyl)	57.02	2	1396.59	2.95905
LEnITTGTYTIHAQK	High	227908803	N3(Deamidated)	57	2	1690.87	1.65119
VELVAmnETDPK	High	117168299	M6(Oxidation); N7(Deamidated)	56.66	2	1362.65	2.86464
nYTVVmSTR	High	282165729	N1(Deamidated); M6(Oxidation)	56.54	2	1087.51	1.98768
VAFVLYNNLGPYLSTEnASmK	High	58037543	N17(Deamidated); M20(Oxidation)	56.51	2	2348.16	3.9656
AnSTGILSVR	High	54607084	N2(Deamidated)	56.34	2	1018.55	1.48304
DSYPDGnITWYR	High	31791059	N7(Deamidated)	56.3	2	1487.65	2.09114
FDEFFSQGcAPGYEKnSTLcDLcIGPLK	High	20330802	C9(Carbamidomethyl); N16(Deamidated); C20(Carbamidomethyl); C23(Carbamidomethyl)	56.24	3	3255.46	8.4512
VNTLEEGKGGPKnDTEER	High	6679120	N13(Deamidated)	56.03	2	1973.94	1.75809
InFTAPFNPNK	High	32469489	N2(Deamidated)	55.88	2	1263.64	2.33516
LSYNVIPLnLTLDNR	High	6679909	N9(Deamidated)	55.84	2	1745.95	2.79528
SAFDPPNFPIcLLGnR	High	158711686	C11(Carbamidomethyl); N15(Deamidated)	55.79	2	1818.89	1.69195
DFLnYTLEER	High	261862282	N4(Deamidated)	55.69	2	1300.61	2.83193
YSGnYTIDPDGSGPLKPFVVYcDIR	High	116063560	N4(Deamidated); C22(Carbamidomethyl)	55.6	3	2834.34	2.68872
nNmEITWTPmnATSAFGPNLR	High	237858632;35215309	N1(Deamidated); M3(Oxidation); M10(Oxidation); N11(Deamidated)	55.56	2	2399.09	9.93672
ADANPPATEYHWTTLnGSLPK	High	40254534	N16(Deamidated)	55.47	2	2284.09	2.90569
LSQALGnITVVQK	High	298676452	N7(Deamidated)	55.47	2	1371.79	3.08535
VYInDSVELSR	High	9845246	N4(Deamidated)	55.42	2	1295.65	2.39972
ILIWEDGSLEINnITR	High	227497226	N13(Deamidated)	55.42	2	1886.99	2.77117
LEQmTmNInLTGPLPAPYK	High	117647249	M4(Oxidation); M6(Oxidation); N9(Deamidated)	55.29	2	2164.07	3.22384
GGnVTLPcK	High	162138936	N3(Deamidated); C8(Carbamidomethyl)	55.25	2	946.468	1.4228
VDQnDnTSLQWSNPAQQTLYFDDKK	High	225543375	N4(Deamidated); N6(Deamidated)	55.16	3	2958.38	18.4655
NALGTAnQTInGHFLK	High	33413429	N7(Deamidated); N11(Deamidated)	54.97	2	1700.86	1.13878
VSPDHQPQPQYVSYnQSSYTQWNLQPDTK	High	112293279	N15(Deamidated)	54.97	3	3436.6	7.78577
AGVnYTLQVYPDEGYHISDK	High	238776842	N4(Deamidated)	54.95	3	2271.07	11.6717
FVSnQTmYYSWEGnPInIScDVTANPPASIHWR	High	6754920	N4(Deamidated); M7(Oxidation); N14(Deamidated); N17(Deamidated); C20(Carbamidomethyl)	54.95	3	3873.77	13.0959
NELmLnSSLmR	High	344217723	M4(Oxidation); N6(Deamidated); M10(Oxidation)	54.87	2	1340.62	2.94402
IKTPEKnDTAAAGQGER	High	154240716	N7(Deamidated)	54.82	2	1786.89	0.771998
LSnLTEGmLR	High	62990174	N3(Deamidated); M8(Oxidation)	54.74	2	1150.58	2.33913
DADEGDTLAnSSDLLK	High	50950119	N10(Deamidated)	54.64	2	1664.76	3.21804
nVSYnISSTVR	High	294997315	N1(Deamidated); N5(Deamidated)	54.52	2	1241.6	2.08428
IIAAnNSGTFK	High	110347545	N5(Deamidated)	54.45	2	1136.6	2.45681
DGQLLPSSnYSNIK	High	124517683	N9(Deamidated)	54.3	2	1536.76	1.98494
VDVmnSTLVK	High	110347545	M4(Oxidation); N5(Deamidated)	54.09	2	1122.57	1.46022
LTnVTFPTGQVSSFR	High	124248484	N3(Deamidated)	54.09	2	1654.85	3.82138
VnASTTDPNSTVEQSALTR	High	114326497	N2(Deamidated)	54.07	2	1991.96	1.72114
AAPYWIVAPQNLVLSPGEnGTLIcR	High	225637535	N19(Deamidated); C24(Carbamidomethyl)	54.04	2	2741.43	13.5142
GnETIVNLIHSTR	High	22203763	N2(Deamidated)	53.94	2	1454.76	3.00424
InGTDVDIGmDFR	High	157909807	N2(Deamidated); M10(Oxidation)	53.9	2	1469.66	2.40204
VInFYAGAnQSmnVTcVGK	High	7242138	N3(Deamidated); N9(Deamidated); M12(Oxidation); N13(Deamidated); C16(Carbamidomethyl)	53.9	2	2091.96	10.3028
RTnYTIDVYEmK	High	163792196	N3(Deamidated); M11(Oxidation)	53.69	2	1549.72	2.71184
YLQPLLAVQFTnLTVDTEIR	High	6753138	N12(Deamidated)	53.64	2	2335.26	3.64402
NPnGTVTVISR	High	40254534	N3(Deamidated)	53.6	2	1158.61	1.15759
SSSHLPPSSYFnASGR	High	6753448	N12(Deamidated)	53.6	2	1694.78	2.57278
QmVENFSPnQTK	High	237858632;35215309	M2(Oxidation); N9(Deamidated)	53.49	2	1439.65	0.735359
QTVEEEGGASSYnTSSK	High	226958549	N13(Deamidated)	53.34	2	1774.76	1.43473
IVSNncTDGLR	High	23956144	N5(Deamidated); C6(Carbamidomethyl)	53.19	2	1249.59	1.63889
IDVnSWIEnFTK	High	161086902	N4(Deamidated); N9(Deamidated)	53.14	2	1467.71	4.97635
YLQPLLAVQFTnLTVDTEIR	High	6753138	N12(Deamidated)	53.13	2	2336.27	12.5741
GYLLTLnFTK	High	113195678	N7(Deamidated)	52.71	2	1170.65	3.97379
IFIFnQTGIEAK	High	52693935	N5(Deamidated)	52.64	2	1381.74	2.38269
FAEInGSALcSYnIKPSEYTLTSK	High	227499988	N5(Deamidated); C10(Carbamidomethyl); N13(Deamidated)	52.59	3	2695.31	10.5182
YSGVnmTGFR	High	163659879	N5(Deamidated); M6(Oxidation)	52.36	2	1148.51	1.22634
ANYNLPImVTDSGKPPmTnITDLR	High	110625609	M8(Oxidation); M17(Oxidation); N19(Deamidated)	52.28	3	2694.32	3.52582
EAIPQFSAAQKPLLSLEETLnVTER	High	157952224	N21(Deamidated)	52.26	3	2785.47	3.9883
AnTTQPGIVEGGQVLK	High	154240716	N2(Deamidated)	52.03	2	1612.86	2.43203
VFGSQnLTTVK	High	157951706	N6(Deamidated)	51.98	2	1194.64	1.42628
LnASLPALLLIR	High	9055172	N2(Deamidated)	51.93	2	1294.81	2.92757
ASVDVFGnR	High	110347502	N8(Deamidated)	51.89	2	965.47	0.947509
YDIFQYQTTnTTNPGYR	High	60460877	N10(Deamidated)	51.88	2	2082.96	7.09013
YAVYWnSSNPR	High	6753724	N6(Deamidated)	51.84	2	1357.62	2.8373
YIInGSHAnETR	High	226437629	N4(Deamidated); N9(Deamidated)	51.76	2	1376.65	2.2817
YQLGTSPYVYQLTTRPVTDGQPHSVnITR	High	116063560	N26(Deamidated)	51.66	3	3294.68	16.6301
IYnASELPVR	High	41351529	N3(Deamidated)	51.6	2	1162.61	2.38894
NnVTEIQGIPGAASGLIK	High	158711686	N2(Deamidated)	51.07	2	1783.95	1.81267
LVQVGIYnGTHVIPNDR	High	294997259	N8(Deamidated)	51.03	2	1896	1.88125
LAFLmInDSLVPNmIIPR	High	238776842	M5(Oxidation); N7(Deamidated); M14(Oxidation)	51.01	2	2090.11	3.98072
GcKDnATDSVPLR	High	124494256	C2(Carbamidomethyl); N5(Deamidated)	50.86	2	1433.67	0.852577
EALNQAVnTTR	High	124487155	N8(Deamidated)	50.75	2	1217.61	1.80526
LLLPAKnTTHLK	High	6754920	N7(Deamidated)	50.54	2	1349.82	3.39486
FSELIVNnATEELLVK	High	225735655	N8(Deamidated)	50.5	2	1819.98	3.79033
TENLDVIVnISDTESWGQHVQK	High	7242138	N9(Deamidated)	50.44	3	2513.22	3.35618
EnGTDAVQEEEESPAEGSK	High	157951706	N2(Deamidated)	50.27	2	2006.83	1.08638
ISTnITLVcKPGDLESAPVLR	High	133778978	N4(Deamidated); C9(Carbamidomethyl)	50.11	3	2284.23	2.41122
KLVQVGIYnGTHVIPNDR	High	294997259	N9(Deamidated)	49.97	3	2024.1	3.83654
NVETnnSTVLIEGK	High	312032384	N5(Deamidated); N6(Deamidated)	49.78	2	1519.75	-1.50539
DATIQAYLSSGnFSK	High	113195678	N12(Deamidated)	49.64	2	1602.77	1.55365
LNLDGSnYTLLK	High	124494256	N7(Deamidated)	49.6	2	1351.72	4.4839
AAPYWIVAPQNLVLSPGEnGTLIcR	High	225637535	N19(Deamidated); C24(Carbamidomethyl)	49.59	2	2740.43	5.01381
VVAVSPAnISR	High	225690610	N8(Deamidated)	49.49	2	1113.63	1.60921
GTVLcGPPPAVEnASLVGVR	High	40789268	C5(Carbamidomethyl); N13(Deamidated)	49.45	2	1994.05	4.89436
VPYNVGPGFAGnFSTQK	High	228008367	N12(Deamidated)	49.33	2	1783.87	4.64793
AHNELGTnSTSLR	High	238859616	N8(Deamidated)	49.32	2	1400.68	1.70154
FVPFSDQQISnDSSSSEnR	High	163792196	N11(Deamidated); N18(Deamidated)	49.25	2	2145.92	0.753792
TcnSSLTLR	High	126116570	C2(Carbamidomethyl); N3(Deamidated)	49.17	2	1052.51	1.69659
nATGmEVGWYR	High	113199771	N1(Deamidated); M5(Oxidation)	49.13	2	1300.57	2.21216
YADTIYnISmK	High	228008367	N7(Deamidated); M10(Oxidation)	49.12	2	1335.62	3.71936
FQDSSVFnETLR	High	514961954	N8(Deamidated)	49.04	2	1443.68	1.34535
EmLPFWmnSTGK	High	28893409	M2(Oxidation); M7(Oxidation); N8(Deamidated)	48.92	2	1473.64	2.49614
AEAVGETLTLPGLVSADnGTYTcEAANK	High	23346547	N18(Deamidated); C23(Carbamidomethyl)	48.91	2	2853.36	6.41843
SDFSQTmLFQAnTTR	High	153791843	M7(Oxidation); N12(Deamidated)	48.75	2	1763.8	3.19078
IGTWDPSSGLnmTESQK	High	163659879	N11(Deamidated); M12(Oxidation)	48.72	2	1867.84	1.77307
ETWNnVTVWGSR	High	237858632;35215309	N5(Deamidated)	48.4	2	1449.68	2.56171
mnGTEmNLEPGSR	High	54607084	M1(Oxidation); N2(Deamidated); M6(Oxidation)	48.28	2	1468.61	0.706097
SAEGTFFInK	High	67514549	N9(Deamidated)	48.13	2	1114.54	2.28585
LnYSLPTGQSmEVQLPK	High	126722834	N2(Deamidated); M11(Oxidation)	47.81	2	1921.96	2.69717
GIAnLSnFIR	High	294997315	N4(Deamidated); N7(Deamidated)	47.8	2	1106.59	2.14179
IKLDnYSTQELGR	High	6754900	N5(Deamidated)	47.74	2	1537.79	2.76194
ILIWEDGSLEInnITR	High	227497226	N12(Deamidated); N13(Deamidated)	47.7	2	1888	15.0505
TmVFPVmYLnESVLIDK	High	6680878	M2(Oxidation); M7(Oxidation); N10(Deamidated)	47.57	2	2032.01	2.42822
LnGTDPIVAADSKR	High	124494256	N2(Deamidated)	47.55	2	1457.76	1.201
LDWLGncSGLnDDSYGYR	High	6753138	N6(Deamidated); C7(Carbamidomethyl); N11(Deamidated)	47.45	2	2106.9	12.3513
nGVTHNFAVTSVGGLPVnETTLAEVLR	High	261244940	N1(Deamidated); N18(Deamidated)	47.44	3	2797.45	3.66847
IYNTPSASYLEVTPDSENDFGNYncTAVNR	High	124517683	N24(Deamidated); C25(Carbamidomethyl)	47.24	3	3412.5	1.5208
LYWISSGnHTINR	High	124494256	N8(Deamidated)	47.16	2	1561.78	0.467132
YYHGELSYLnVTR	High	6753556	N10(Deamidated)	46.95	2	1615.78	3.52277
DEDAEnLGHFVmFPAnGSIDLmYFPYYGK	High	7242138	N6(Deamidated); M12(Oxidation); N16(Deamidated); M22(Oxidation)	46.78	3	3374.49	11.6481
TnYTIDVYEmK	High	163792196	N2(Deamidated); M10(Oxidation)	46.71	2	1393.62	3.4864
SDLnPAnGSYPFQALHQR	High	31560090	N4(Deamidated); N7(Deamidated)	46.68	2	2016.96	10.3613
LnGVnVTYSPGGHIAGIQR	High	124248484	N2(Deamidated); N5(Deamidated)	46.49	3	1955	0.192332
VVncSDPGSVENAVR	High	124248566	N3(Deamidated); C4(Carbamidomethyl)	46.03	2	1603.74	-0.0352875
AnNSWFQSILK	High	224809376	N2(Deamidated)	45.85	2	1308.66	2.64657
DGLALnLTLR	High	31982223	N6(Deamidated)	45.83	2	1086.62	3.14251
LLNnLTSIK	High	153791270	N4(Deamidated)	45.79	2	1016.6	1.98433
KLNLDGSnYTLLK	High	124494256	N8(Deamidated)	45.77	2	1479.81	2.44644
nSTFGSVEVFSLDPNK	High	31542362	N1(Deamidated)	45.74	2	1741.83	3.60471
LTnVTRPTGVVTSLHR	High	154090989	N3(Deamidated)	45.69	3	1751.98	2.83625
VnYSYTAVQIPTDIYK	High	291290989	N2(Deamidated)	45.66	2	1875.94	3.86069
WEnQTLSLR	High	41680705	N3(Deamidated)	45.56	2	1147.58	1.92259
TSDTGEEEAITnSTEAnGKYVVVSTPEK	High	116014342	N12(Deamidated); N17(Deamidated)	45.54	3	2958.37	2.27772
WDPVVPLRnESTVTGYK	High	54607084	N9(Deamidated)	45.51	2	1962	2.46545
VDHESLnATPQVAmQVLEIHYTPSVK	High	225543375	N7(Deamidated); M14(Oxidation)	45.45	3	2923.47	4.94987
mVVTLTELPSGnDTSGLEnK	High	85861220	M1(Oxidation); N12(Deamidated); N19(Deamidated)	45.41	2	2123.01	2.0807
QTLFFnGTR	High	23346547	N6(Deamidated)	45.33	2	1084.54	1.74053
LQAQDSGFYEcYTPSTDTQYLGnYSAK	High	32189434	C11(Carbamidomethyl); N23(Deamidated)	45.26	3	3108.35	3.5591
LnTESNASTLLLDnSTFVTFK	High	238776842	N2(Deamidated); N14(Deamidated)	45.22	2	2317.15	3.12874
VPAELnGSmYR	High	38348466	N6(Deamidated); M9(Oxidation)	45.18	2	1253.59	2.57582
nYSIFLADINQER	High	121674797	N1(Deamidated)	45.11	2	1583.77	2.08093
TAADATGLQPILNQFTPAnVSR	High	154240716	N19(Deamidated)	45.05	2	2287.17	6.49755
SPAnGSLGPmLnLSSGESR	High	110225379	N4(Deamidated); M10(Oxidation); N12(Deamidated)	45.04	2	1891.88	4.89772
DGQELHPLETTVnPSGKnVSYnISSTVR	High	294997315	N13(Deamidated); N18(Deamidated); N22(Deamidated)	45	3	3046.5	17.1999
TGTSmTSVNWLTPnGTLmTHGSYR	High	38016190	M5(Oxidation); N14(Deamidated); M18(Oxidation)	44.96	3	2645.21	4.19542
FAVLAnnNLQILNInK	High	6754920	N6(Deamidated); N7(Deamidated); N15(Deamidated)	44.95	2	1802	16.5349
GGNVLLncSAESDR	High	117168295	N7(Deamidated); C8(Carbamidomethyl)	44.82	2	1492.67	3.02855
GnITEYQcHQYITK	High	6677905	N2(Deamidated); C8(Carbamidomethyl)	44.81	2	1755.8	1.95548
WInDTVVVYK	High	238776842	N3(Deamidated)	44.8	2	1237.65	1.91649
SVDVYNImcHVAGITPLPNnGSWSR	High	28893409	M8(Oxidation); C9(Carbamidomethyl); N20(Deamidated)	44.78	3	2804.32	2.79631
IVASDSGKPSLnQTALVR	High	422744224	N12(Deamidated)	44.65	2	1857.01	2.25153
AnIQFGEnGTTISAVTNK	High	6680878	N2(Deamidated); N8(Deamidated)	44.6	2	1866.93	13.9728
InYTcNQGYR	High	52426750	N2(Deamidated); C5(Carbamidomethyl)	44.54	2	1289.56	1.68654
LSLSEnYTLSIANAK	High	31791059	N6(Deamidated)	44.51	2	1624.85	2.20688
DLNLmnVTWK	High	226437629	M5(Oxidation); N6(Deamidated)	44.44	2	1250.61	2.79531
YLInVTFEGR	High	117168299	N4(Deamidated)	44.41	2	1212.63	2.67245
nVTDTFKR	High	169790905	N1(Deamidated)	44.4	2	981.502	1.88625
nETIWYVR	High	19526978	N1(Deamidated)	44.22	2	1081.53	2.91634
SEmmYGnETELK	High	124486807	M3(Oxidation); M4(Oxidation); N7(Deamidated)	44.03	2	1464.59	1.75328
VnYTmDVFELK	High	164419755	N2(Deamidated); M5(Oxidation)	44.01	2	1375.65	1.96299
GSALHEDIYVLHDnGTLEIPVAQK	High	225637535	N14(Deamidated)	44	3	2620.33	3.58148
AnGTTHLVVTEPTR	High	117938277	N2(Deamidated)	43.85	2	1496.78	3.19806
ALVnFTR	High	183979966	N4(Deamidated)	43.83	2	821.453	1.81905
YIISPInGTVYLSEKDPVNTK	High	422744224	N7(Deamidated)	43.79	2	2352.25	7.18225
LnYTLVGEPLR	High	132626295	N2(Deamidated)	43.74	2	1275.7	2.77987
nTTISVHPSTR	High	170295823	N1(Deamidated)	43.68	2	1213.62	1.75755
ESLLPVTLQcnLTSSSHTLmYSYWTR	High	153945724	C10(Carbamidomethyl); N11(Deamidated); M20(Oxidation)	43.57	3	3104.48	4.59916
EATIVGEnETYPR	High	46309573	N8(Deamidated)	43.31	2	1479.7	1.79958
DPAGWLSInPInGTVDTTAVLDR	High	110625609	N9(Deamidated); N12(Deamidated)	43.27	2	2427.24	12.9637
LLnQTLR	High	13385294	N3(Deamidated)	43.27	2	858.506	1.35522
SISEnATATTEPK	High	254692970	N5(Deamidated)	43.22	2	1349.65	1.61077
DLGPALAnSSHDVK	High	116734815	N8(Deamidated)	43.21	2	1424.71	2.85587
FGTcSQLcnNTK	High	124494256	C4(Carbamidomethyl); C8(Carbamidomethyl); N9(Deamidated)	42.93	2	1430.6	0.088218
SRnSTVEYSLSK	High	110625645	N3(Deamidated)	42.85	2	1371.68	2.32048
IYDISnDmTInEGTnVTLTcLATGKPEPVISWR	High	28893343	N6(Deamidated); M8(Oxidation); N11(Deamidated); N15(Deamidated); C20(Carbamidomethyl)	42.5	3	3727.84	18.6122
LVVnISDLGYPK	High	422744224	N4(Deamidated)	42.43	2	1318.73	3.08662
VKDLmVInR	High	326937503	M5(Oxidation); N8(Deamidated)	42.42	2	1104.61	2.85478
IQFGGAnVSGFQIVDYDDSLVSK	High	85861220	N7(Deamidated)	42.17	2	2460.19	0.257628
VSPDHQPQPQYVSYnQSSYTQWNLQPDTK	High	112293279	N15(Deamidated)	42.15	3	3437.59	9.3794
VLQPLSSTSLYVcGTNAFQPTcDHLnLTSFK	High	49274623	C13(Carbamidomethyl); C22(Carbamidomethyl); N26(Deamidated)	42.13	3	3500.71	10.9168
TEAGVFEYVADPTFEnFTGGVK	High	226958476	N16(Deamidated)	41.84	2	2379.11	2.8832
STEGQSSLTVTnVTEEHYGnYTcVAANK	High	30425330	N12(Deamidated); N20(Deamidated); C23(Carbamidomethyl)	41.84	3	3062.36	3.59645
VLKDAVnnITAK	High	161086902	N7(Deamidated); N8(Deamidated)	41.72	2	1287.72	2.7323
NGGnATLQVDNWPVNEHYPTGNTDNER	High	355390246	N4(Deamidated)	41.55	3	3014.33	3.9382
DVnYTQIVVDR	High	49274623	N3(Deamidated)	41.31	2	1322.66	3.06202
IFPSGnVTNILEmR	High	124248484	N6(Deamidated); M13(Oxidation)	41.28	2	1607.82	4.10591
SnISILR	High	161760627	N2(Deamidated)	41.06	2	803.463	1.63074
DLQGnPIAnATISVDGIDHDVTSAK	High	22203763	N5(Deamidated); N9(Deamidated)	41.05	2	2553.27	14.8733
LSPYVnYSFR	High	225637535	N6(Deamidated)	41	2	1246.62	4.30035
YQTLncSVNVR	High	31982236	N5(Deamidated); C6(Carbamidomethyl)	40.95	2	1354.65	2.43604
mLSAFnATSGK	High	31560063	M1(Oxidation); N6(Deamidated)	40.66	2	1143.54	1.57453
VnYTEVSR	High	168693635	N2(Deamidated)	40.57	2	968.469	1.06421
InSDPTLLPnITLGcEIR	High	126116570	N2(Deamidated); N10(Deamidated); C15(Carbamidomethyl)	40.53	2	2028.06	12.4746
YLnETQQLTQK	High	31982171	N3(Deamidated)	40.48	2	1366.69	4.5148
AnHSGAVVLLK	High	31982236	N2(Deamidated)	40.32	2	1109.63	1.87733
KITEGVnVTQK	High	110347545	N7(Deamidated)	40.27	2	1217.68	1.79157
LmQnGTILYTmR	High	153791906	M2(Oxidation); N4(Deamidated); M11(Oxidation)	40.19	2	1473.71	2.49303
TEQLIIQAPnTSVHIYEPYPAGADVPFGPPLnK	High	89242146	N10(Deamidated); N32(Deamidated)	40.16	3	3579.85	16.2722
LNQASFHTPPnVSVcDVNWEK	High	41282044	N11(Deamidated); C15(Carbamidomethyl)	40.11	3	2443.14	3.40515
GIPDQKVnFTcK	High	294997315	N8(Deamidated); C11(Carbamidomethyl)	40.01	2	1407.7	2.19056
WSYVAYnESDK	High	254028203	N7(Deamidated)	39.96	2	1362.59	5.47886
GVTHLnISGLK	High	124494256	N6(Deamidated)	39.88	2	1139.64	2.41621
GnISSAPAPAmPTALHSK	High	36054013	N2(Deamidated); M11(Oxidation)	39.81	2	1766.88	1.55553
LLPQIDIVnISDSFEmTYR	High	164664512	N9(Deamidated); M16(Oxidation)	39.8	2	2272.13	11.1017
LVPLGVFTGLSnLTK	High	260269246	N12(Deamidated)	39.77	2	1559.91	2.54854
LSAITnDTAAK	High	117647249	N6(Deamidated)	39.53	2	1105.58	1.70929
ETLVTLFDnR	High	164698432	N9(Deamidated)	39.52	2	1208.62	3.31062
YSIYKDPAGWLSINPInGTVDTTAVLDR	High	110625609	N17(Deamidated)	39.18	3	3080.58	5.81299
DVGSGTTnnSQAcAQFLEQYFHnSDLTEFmR	High	6753448	N8(Deamidated); N9(Deamidated); C13(Carbamidomethyl); N23(Deamidated); M30(Oxidation)	39.15	3	3586.56	17.4611
TnYTLHVIEmK	High	164664512	N2(Deamidated); M10(Oxidation)	39.11	2	1365.67	2.23483
LnVTSPDLFR	High	124487155	N2(Deamidated)	38.95	2	1162.61	1.54036
SnLTVLR	High		N2(Deamidated)	38.9	2	803.463	1.55478
TEnLDVIVnISDTESWGQHVQK	High	7242138	N3(Deamidated); N9(Deamidated)	38.87	2	2514.24	15.6166
GnGTLITFHSAFQccGK	High	341823657	N2(Deamidated); C14(Carbamidomethyl); C15(Carbamidomethyl)	38.72	2	1898.86	3.41206
AFFDETKnNTR	High	132626295	N8(Deamidated)	38.52	2	1343.62	-0.961439
YEQLQnETR	High	29150253	N6(Deamidated)	38.46	2	1181.55	1.4847
SDLNPAnGSYPFQALHQR	High	31560090	N7(Deamidated)	38.41	2	2015.96	3.4671
AmnSSSFEGVSGHVVFDASGSR	High	131888529	M2(Oxidation); N3(Deamidated)	38.28	3	2244.98	0.320844
nVTALLmEAR	High	294997259	N1(Deamidated); M7(Oxidation)	38.22	2	1134.58	2.0819
ITnVSEEDSGEYFcLASnK	High	237858632;35215309	N3(Deamidated); C14(Carbamidomethyl); N18(Deamidated)	38.08	2	2164.96	15.9614
IGSYnGTAGDSLSYHQGRPFSTEDR	High	226958549	N5(Deamidated)	38	3	2716.23	3.84855
InADPVLLPnITLGSEIR	High	166999785	N2(Deamidated); N10(Deamidated)	37.9	2	1937.09	15.1481
nSTIQAANLAGLK	High	30089677	N1(Deamidated)	37.83	2	1301.71	2.78482
SYIFIYDGnKNSTTTDQnFTSAK	High	6754382	N9(Deamidated); N18(Deamidated)	37.76	3	2617.2	2.69054
DGQELHPLETTVNPSGKnVSYnISSTVR	High	294997315	N18(Deamidated); N22(Deamidated)	37.7	3	3044.5	5.48807
IHETAPDEQSIWnVTVLPnSK	High	35215309	N13(Deamidated); N19(Deamidated)	37.64	2	2380.18	5.74504
FFHVnGSAFLPR	High	58037273	N5(Deamidated)	37.18	2	1392.71	5.01246
ncSSITLQnITR	High	451898112	N1(Deamidated); C2(Carbamidomethyl); N9(Deamidated)	37.18	2	1408.68	2.7988
ALVTLEGIPAAVPGQPAELQLnVTK	High	159110562	N22(Deamidated)	37.14	2	2530.42	4.75611
QnVSLSILK	High	294997259	N2(Deamidated)	37.1	2	1002.59	2.15876
WGHnVTEFQQR	High	7657067	N4(Deamidated)	37.01	2	1402.65	0.131688
LnQASFHTPPnVSVcDVNWEK	High	41282044	N2(Deamidated); N11(Deamidated); C15(Carbamidomethyl)	36.82	2	2444.15	11.7469
VnGTDLAPDLLnGSQLILR	High	225703147	N2(Deamidated); N12(Deamidated)	36.78	2	2011.08	3.7698
VLQFDPGTKnVTALLmEAR	High	294997259	N10(Deamidated); M16(Oxidation)	36.61	3	2120.11	1.87822
GKAnSTGTLVITnPTR	High	227497226	N4(Deamidated); N13(Deamidated)	36.6	2	1631.89	17.6962
LLFFDNYEHnTSVVK	High	6755408	N10(Deamidated)	36.44	2	1826.91	5.57129
DIILHSTGHnISR	High	27370240	N10(Deamidated)	36.43	3	1463.76	1.27088
YNEVnITYSPSGLVTFIQR	High	7657413	N5(Deamidated)	36.36	2	2202.12	4.06859
FYPEDLQLIWLEnGnVSR	High	294997315	N13(Deamidated); N15(Deamidated)	36.29	2	2195.07	4.16447
IDPVTGnITLEEKPAPTDVGLHR	High	422744224	N7(Deamidated)	36.25	3	2473.3	2.67038
SFSGLLDcGncSR	High	161086902	C8(Carbamidomethyl); N10(Deamidated); C11(Carbamidomethyl)	36.22	2	1473.61	2.09368
NmANGQPHSVnITR	High	165377150	M2(Oxidation); N11(Deamidated)	36.19	2	1555.73	2.33126
VmHGGAnITGFQIVNNENPmVQQFIQR	High	163792196	M2(Oxidation); N7(Deamidated); M20(Oxidation)	36.11	3	3076.5	10.905
mYSEGSDIVPQSnETALHYFK	High	46309573	M1(Oxidation); N13(Deamidated)	36.1	3	2433.1	3.52205
KnASSVVPSSVHNSANQR	High	281182810	N2(Deamidated)	36.05	3	1882.94	2.74003
EDnPDKNPEAPLnVSR	High	6755466	N3(Deamidated); N13(Deamidated)	36.05	2	1796.85	13.1551
LLnLTSPEATAK	High	161484610	N3(Deamidated)	36.04	2	1258.69	3.52721
GTFTDcALAnmTQQIR	High	22203747	C6(Carbamidomethyl); N10(Deamidated); M11(Oxidation)	36	2	1843.84	4.93828
VLGFKPKPPKnESLETYPLmmK	High	6753138	N11(Deamidated); M20(Oxidation); M21(Oxidation)	35.96	3	2580.35	2.406
nSTLcDLcIGPLK	High	20330802	N1(Deamidated); C5(Carbamidomethyl); C8(Carbamidomethyl)	35.92	2	1491.72	2.66153
ANIQFGEnGTTISAVTNK	High	6680878	N8(Deamidated)	35.91	2	1865.93	2.53559
LFnGQQGIIIQnFSTR	High	28893343	N3(Deamidated); N12(Deamidated)	35.85	2	1838.95	13.4823
YnGSLGLWR	High	356991139	N2(Deamidated)	35.81	2	1066.54	3.89757
QTFPVPQnISQR	High	6680091	N8(Deamidated)	35.81	2	1415.73	3.12067
YDIFQYQTTnTTNPGYR	High	60460877	N10(Deamidated)	35.77	2	2083.96	16.514
TLLPnTTLTYDTQK	High	163659879	N5(Deamidated)	35.61	2	1609.84	3.46912
KmLSAFnATSGK	High	31560063	M2(Oxidation); N7(Deamidated)	35.49	2	1271.63	2.08844
FNPIVnKTEIENVR	High	6680522	N6(Deamidated)	35.47	2	1673.89	3.06438
NFPDAFENNnVTK	High	189458849	N10(Deamidated)	35.24	2	1510.68	1.71577
FQLLnFSSSELK	High	71040107	N5(Deamidated)	35.16	2	1414.73	14.6086
InGSAVIDSScVPVNK	High	203099104	N2(Deamidated); C11(Carbamidomethyl)	34.9	2	1660.82	2.02862
TVNSLnVSAISIPEHDEADDISDENR	High	31791059	N6(Deamidated)	34.8	3	2841.31	3.95675
nLTIVDSGLK	High	6679150	N1(Deamidated)	34.77	1	1060.59	0.560102
WLGDVLSnASR	High	19527104	N8(Deamidated)	34.75	2	1218.62	4.89889
FVSQTNGnLYIANVESSDRGnYScFVSSPSITK	High	227497226	N8(Deamidated); N21(Deamidated); C24(Carbamidomethyl)	34.62	3	3643.73	11.6104
DVmQVAnTTmSSR	High	112983656	M3(Oxidation); N7(Deamidated); M10(Oxidation)	34.41	2	1472.64	2.16906
ILDQAcGTDnQTYASScHLFATK	High	227330561	C6(Carbamidomethyl); N10(Deamidated); C17(Carbamidomethyl)	34.36	3	2602.16	1.93338
VAWLnR	High	51092272;30425330;257096063	N5(Deamidated)	34.36	2	759.416	2.17689
LVQVGIYnGTHVIPnDRK	High	294997259	N8(Deamidated); N15(Deamidated)	34.33	3	2025.1	11.607
YFAncTVR	High	21312084	N4(Deamidated); C5(Carbamidomethyl)	34.27	2	1031.46	-0.0464584
ALSPnSTISSAPK	High	168693641	N5(Deamidated)	34.26	2	1273.67	1.74278
nATVVWmK	High	31791059	N1(Deamidated); M7(Oxidation)	34.24	1	965.477	0.951334
LLFPTnSSSR	High	112293279	N6(Deamidated)	34.24	2	1122.58	1.43126
RPASnISASIQR	High	148747408	N5(Deamidated)	34.21	2	1300.7	0.264361
ScVAITDAFPQnmSR	High	226958476	C2(Carbamidomethyl); N12(Deamidated); M13(Oxidation)	34.17	2	1713.77	6.03195
VGVWSPADGLnITEVAK	High	124487364	N11(Deamidated)	34.1	2	1756.92	4.29715
NLRPQDYAnYScIASVR	High	514961954	N9(Deamidated); C12(Carbamidomethyl)	34.07	3	2027.97	2.62386
LLFFDnYEHnTSVVK	High	6755408	N6(Deamidated); N10(Deamidated)	34.06	2	1827.91	16.7168
NcnLTQIGGLIDSK	High	163659879;124487364	C2(Carbamidomethyl); N3(Deamidated)	33.9	2	1533.76	3.46065
mTQESALIFPFLnK	High	16716503	M1(Oxidation); N13(Deamidated)	33.87	2	1656.84	15.0294
LGTEAmSTnHSVIVNSPVITAAINK	High	58037543	M6(Oxidation); N9(Deamidated)	33.82	3	2584.34	3.17178
LGcWNPVTGLnGSLTDK	High	6680091	C3(Carbamidomethyl); N11(Deamidated)	33.61	2	1832.89	4.46324
nQTVTATFGYPFR	High	41282044	N1(Deamidated)	33.59	2	1503.74	16.3102
AFnISPnDTSSGScGINLVTLK	High	113195678	N3(Deamidated); N7(Deamidated); C14(Carbamidomethyl)	33.56	2	2297.12	10.7605
IISEnKTDEEPGYIK	High	117168299	N5(Deamidated)	33.52	2	1736.87	6.10128
nSTTTDQnFTSAK	High	6754382	N1(Deamidated); N8(Deamidated)	33.38	2	1416.61	1.323
QEnISVGSVLLTVnATDPDSLQHQTIR	High	110625609	N3(Deamidated); N14(Deamidated)	33.34	3	2939.5	18.1125
LFALnnTTGLITVQR	High	422744224	N5(Deamidated); N6(Deamidated)	33.27	2	1662.93	15.5575
YnYTEDPTILR	High	6679389	N2(Deamidated)	33.25	2	1385.66	2.82301
INADPVLLPnITLGSEIR	High	166999785	N10(Deamidated)	33.15	2	1936.08	4.37811
DGEAFEmnGTEDGR	High	110347545	M7(Oxidation); N8(Deamidated)	33.07	2	1544.59	3.05742
LVQVGIYnGTHVIPNDRK	High	294997259	N8(Deamidated)	33.01	3	2024.1	1.57498
LnmTLPDALVPTFSISnHSLK	High	113195678	N2(Deamidated); M3(Oxidation); N17(Deamidated)	33	3	2316.19	2.66846
VSANIQnmTTADVIK	High	226052731	N7(Deamidated); M8(Oxidation)	32.99	2	1621.82	5.10954
VDGQLVnLTLVEFR	High	116063560	N7(Deamidated)	32.97	2	1604.88	13.984
LSSSPnVTIScK	High	111378397	N6(Deamidated); C11(Carbamidomethyl)	32.96	2	1293.64	1.70188
HmQnLTEEQPIEVK	High	117647249	M2(Oxidation); N4(Deamidated)	32.93	2	1713.82	14.333
IVASDSGKPSLnQTALVR	High	422744224	N12(Deamidated)	32.92	3	1858.01	11.9956
KVIcTGPnDTSPGSPR	High	294997259	C4(Carbamidomethyl); N8(Deamidated)	32.85	2	1686.81	1.47806
TFAFISNQPGEGEAnSTR	High	30841016	N15(Deamidated)	32.83	2	1926.89	4.60531
FIHGGAnVTGFQLVDFNTPmVTK	High	164419755	N7(Deamidated); M20(Oxidation)	32.82	3	2510.26	6.81488
TAnHSAPSLENSVQPGK	High	224994186	N3(Deamidated)	32.78	2	1737.84	2.23064
nLSFWDAPLGSSYmcNK	High	31543108	N1(Deamidated); M14(Oxidation); C15(Carbamidomethyl)	32.78	2	2006.87	4.13418
SLTQGSLIVGNLAPVnGTSQGK	High	183979966	N16(Deamidated)	32.76	2	2142.15	4.32947
LnASIADLQSK	High	124487155	N2(Deamidated)	32.69	2	1160.62	3.65789
TVnSLnVSAISIPEHDEADDISDENR	High	31791059	N3(Deamidated); N6(Deamidated)	32.63	3	2842.31	8.52675
nnmEITWTPmnATSAFGPNLR	High	237858632;35215309	N1(Deamidated); N2(Deamidated); M3(Oxidation); M10(Oxidation); N11(Deamidated)	32.49	2	2400.06	4.58925
FLALAnGSLLVPLLSAK	High	238859616	N6(Deamidated)	32.44	2	1728.04	3.25525
VnLSFPSAQSLPASDTHLK	High	110347469	N2(Deamidated)	32.41	2	2013.03	1.95483
nVTLQDYGR	High	29244530	N1(Deamidated)	32.35	2	1066.52	1.95301
LDPVSLQILQTWnTSYPK	High	84370353	N13(Deamidated)	32.34	2	2105.07	-6.05819
GGSLWLncSTNcPRPER	High	159110562	N7(Deamidated); C8(Carbamidomethyl); C12(Carbamidomethyl)	32.28	3	2004.91	5.31657
VQQVGHYPPAnSSLASR	High	88196788	N11(Deamidated)	32.17	3	1812.91	12.3801
DTAVEGEEIEVncTAmASKPATTIR	High	71040107	N12(Deamidated); C13(Carbamidomethyl); M16(Oxidation)	32.1	3	2710.26	0.963772
AcnATNWIEYmFNK	High	89242146	C2(Carbamidomethyl); N3(Deamidated); M11(Oxidation)	31.95	2	1778.76	3.25586
VAFVLYnnLGPYLSTEnASmK	High	58037543	N7(Deamidated); N8(Deamidated); N17(Deamidated); M20(Oxidation)	31.91	2	2350.15	15.591
LNnITNIGPLDmK	High	188035856	N3(Deamidated); M12(Oxidation)	31.84	2	1459.75	1.81168
FLYnFTR	High	228008367	N4(Deamidated)	31.78	2	961.48	2.1089
VcTGnESLEEnYVQDSK	High	166999785	C2(Carbamidomethyl); N5(Deamidated); N11(Deamidated)	31.76	2	1973.86	14.4943
VIEEFYnQTWNHR	High	165377226	N7(Deamidated)	31.68	2	1737.81	16.1661
mVnHSLHPTEPVK	High	86990446	M1(Oxidation); N3(Deamidated)	31.62	3	1505.75	2.58166
VnLTGTPSQR	High	162417988	N2(Deamidated)	31.6	2	1073.56	1.85101
TYAVYDLFDTAmInNSR	High	120587021	M12(Oxidation); N14(Deamidated)	31.59	2	2010.92	5.5351
VQQVGHYPPAnSSLASR	High	88196788	N11(Deamidated)	31.57	3	1811.91	1.67891
FHVnYTQPLVAVK	High	7242138	N4(Deamidated)	31.5	2	1517.8	0.609796
DATIQAYLSSGnFSK	High	113195678	N12(Deamidated)	31.49	2	1603.77	15.401
LnGVnVTYSPGGHIAGIQR	High	124248484	N2(Deamidated); N5(Deamidated)	31.42	3	1956.01	12.1709
AQSPPAInASYGPFSVEK	High	298493223	N8(Deamidated)	31.41	2	1863.92	2.75268
AVISmLnETmNEAPEETKIVIKK	High	7106409	M5(Oxidation); N7(Deamidated); M10(Oxidation)	31.4	3	2621.35	4.31761
AVISmLnETmnEAPEETKIVIK	High	7106409	M5(Oxidation); N7(Deamidated); M10(Oxidation); N11(Deamidated)	31.38	3	2494.26	11.1659
IQATSLSGnGSWTDPVFFYVPAK	High	112983656	N9(Deamidated)	31.29	2	2487.23	9.66854
WAnITWK	High	35215309	N3(Deamidated)	31.19	2	919.469	2.32814
INNDPDLLPnITLGAR	High	62945392	N10(Deamidated)	31.16	2	1736.93	5.66092
FnFTNcASLK	High	9055376	N2(Deamidated); C6(Carbamidomethyl)	31.15	2	1202.56	4.45949
GGSLWLncSTncPRPER	High	159110562	N7(Deamidated); C8(Carbamidomethyl); N11(Deamidated); C12(Carbamidomethyl)	31.14	3	2005.91	10.7873
DALQnmSSSLK	High	254675312	N5(Deamidated); M6(Oxidation)	31.09	2	1210.57	2.72841
KnNmEITWTPmnATSAFGPNLR	High	237858632;35215309	N2(Deamidated); M4(Oxidation); M11(Oxidation); N12(Deamidated)	31.03	3	2527.17	3.14866
VHVnSSSDNLDYPVLVVVR	High	51036633	N4(Deamidated)	31.02	3	2113.1	2.89557
EQTVSDPFLVVSnTSTFVPYEIK	High	112293279	N13(Deamidated)	31	2	2602.31	12.8145
TVYLYPnQTGLPDPLSK	High	116875858	N7(Deamidated)	30.96	2	1906.99	2.78222
ELNILFLnK	High	225543375	N8(Deamidated)	30.84	2	1104.63	3.48474
LQVTLYncSFGR	High	226958476	N7(Deamidated); C8(Carbamidomethyl)	30.77	2	1458.71	1.51738
WVEnYTNSLLK	High	6678091	N4(Deamidated)	30.76	2	1367.69	2.89587
InNTHALVSLLQNLNK	High	110625609	N2(Deamidated)	30.71	3	1794	13.0459
IYnNTLTYGEVR	High	169790937	N3(Deamidated)	30.61	2	1443.71	1.35706
AREPSnATQLDGPAR	High	6753150	N6(Deamidated)	30.54	3	1584.78	12.7109
SITIAnQTNcPLYVTK	High	40254595	N6(Deamidated); C10(Carbamidomethyl)	30.48	2	1823.94	12.1097
mALcTNnISDFTVK	High	110625972	M1(Oxidation); C4(Carbamidomethyl); N7(Deamidated)	30.4	2	1630.75	4.54684
ncTIESTTFYnTDLYK	High	157909825	N1(Deamidated); C2(Carbamidomethyl); N11(Deamidated)	30.39	2	1971.88	14.7201
GNYDFVEAmIVNnHTSLDVER	High	30520239	M9(Oxidation); N13(Deamidated)	30.34	3	2440.11	2.2694
LVTQTIPcnK	High	31542362	C8(Carbamidomethyl); N9(Deamidated)	30.27	2	1174.62	2.92157
InFTAPFnPNK	High	32469489	N2(Deamidated); N8(Deamidated)	30.14	2	1264.63	5.12691
AAAmLnmTGSGYVWLVGER	High	294997259	M4(Oxidation); N6(Deamidated); M7(Oxidation)	30.1	2	2058.98	6.76485
VLQFDPGTKnVTALLmEAR	High	294997259	N10(Deamidated); M16(Oxidation)	30.08	2	2121.12	12.9586
VAQPGInYALGTnTSYPNNLLR	High	30039682	N7(Deamidated); N13(Deamidated)	29.95	2	2378.24	16.029
GVnVTmPSQPGVPPLSSTQLQIDPALQEFQLVDLSR	High	183979966	N3(Deamidated); M6(Oxidation)	29.91	3	3879	2.72753
DnTTcYEFKK	High	124494256	N2(Deamidated); C5(Carbamidomethyl)	29.85	2	1306.57	2.35715
FnPIVnKTEIENVR	High	6680522	N2(Deamidated); N6(Deamidated)	29.73	2	1674.89	12.1686
FLSYnVTR	High	27369505	N5(Deamidated)	29.71	2	1000.51	1.73506
KKENGVFEEISnSSGR	High	153945724	N12(Deamidated)	29.69	2	1781.86	-1.51536
FEnQTcFPLPDSR	High	197333685	N3(Deamidated); C6(Carbamidomethyl)	29.68	2	1612.72	16.8821
LRNPcTSEQncTSPFSYK	High	45504394	C5(Carbamidomethyl); N10(Deamidated); C11(Carbamidomethyl)	29.63	3	2189.97	3.53235
ncSEPYcPLGcSSR	High	226958549	N1(Deamidated); C2(Carbamidomethyl); C7(Carbamidomethyl); C11(Carbamidomethyl)	29.47	2	1687.66	2.51216
TFAFISnQPGEGEAnSTR	High	30841016	N7(Deamidated); N15(Deamidated)	29.29	2	1927.89	13.7803
LSYSGIPLnLTLDNR	High	6679907	N9(Deamidated)	29.29	2	1676.89	3.70439
nLSVVILGASDKDLHPNTDPFK	High	110625609	N1(Deamidated)	29.28	3	2381.24	2.28504
VmHGGAnITGFQIVnNENPmVQQFIQR	High	163792196	M2(Oxidation); N7(Deamidated); N15(Deamidated); M20(Oxidation)	29.22	3	3077.48	12.5651
LLnTTDVYLLPSLNPDGFER	High	150378501	N3(Deamidated)	29.16	2	2278.17	2.98156
TVEInLTNDYYLSGGLSEK	High	124486807	N5(Deamidated)	29.12	2	2117.03	0.265954
IVPGDISSLSLVnGTFLEIK	High	21450363	N13(Deamidated)	29.1	2	2103.17	4.6564
ELGVVmYncScLAR	High	7242181	M6(Oxidation); N8(Deamidated); C9(Carbamidomethyl); C11(Carbamidomethyl)	29	2	1688.75	2.69698
YnGSLTTPNcDETVIWTVYK	High	6671678	N2(Deamidated); C10(Carbamidomethyl)	28.83	2	2362.1	3.84396
SVDFNRGTDnITVR	High	30425330	N10(Deamidated)	28.78	2	1594.79	2.89781
LSYnVIPLnLTLDNR	High	6679909	N4(Deamidated); N9(Deamidated)	28.74	2	1746.93	-0.0753768
DVGSGTTnnSQAcAQFLEQYFHNSDLTEFmR	High	6753448	N8(Deamidated); N9(Deamidated); C13(Carbamidomethyl); M30(Oxidation)	28.45	3	3587.56	19.7
RVnYTmDVFELK	High	164419755	N3(Deamidated); M6(Oxidation)	28.42	2	1531.75	3.96446
YnGSLTTPncDETVIWTVYK	High	6671678	N2(Deamidated); N9(Deamidated); C10(Carbamidomethyl)	28.16	2	2363.11	14.2223
TVEInLTnDYYLSGGLSEK	High	124486807	N5(Deamidated); N8(Deamidated)	28.13	2	2118.05	15.6506
VINFYAGAnQSmnVTcVGKR	High	7242138	N9(Deamidated); M12(Oxidation); N13(Deamidated); C16(Carbamidomethyl)	28.05	3	2247.08	13.5612
DDLDPERnESEPGSQR	High	161086902	N8(Deamidated)	27.98	3	1844.79	1.68979
YSnLSLK	High	226437629	N3(Deamidated)	27.97	2	825.437	1.93705
nVTYGTYLDDPDPDDGFnYK	High	41282022	N1(Deamidated); N18(Deamidated)	27.9	2	2310.99	12.9677
KNNmEITWTPmnATSAFGPNLR	High	237858632;35215309	M4(Oxidation); M11(Oxidation); N12(Deamidated)	27.65	3	2526.18	2.50039
VPPGDTPPGnGSGPR	High	12667794	N10(Deamidated)	27.63	2	1405.67	2.76796
AREPSnATQLDGPAR	High	6753150	N6(Deamidated)	27.61	3	1583.78	1.3934
ERVEnTSQPGEmQVTIQnLmPATVYIFK	High	112363084	N5(Deamidated); M12(Oxidation); N18(Deamidated); M20(Oxidation)	27.6	3	3258.61	15.7837
IQTLQAPPDIAPAnVTLR	High	40254254	N14(Deamidated)	27.58	2	1919.06	0.123405
SALDSFTLImQTYnR	High	254553485	M10(Oxidation); N14(Deamidated)	27.49	2	1776.85	3.63849
nESLETYPLmmK	High	6753138	N1(Deamidated); M10(Oxidation); M11(Oxidation)	27.29	2	1488.66	1.63212
VSPDHQPQPQYVSYnQSSYTQWNLQPDTK	High	112293279	N15(Deamidated)	27.27	3	3438.59	14.1671
VQEEQnVTSELIAK	High	117168301	N6(Deamidated)	27.25	2	1588.81	3.94284
nYTWVPIR	High	291290989	N1(Deamidated)	27.24	2	1049.54	2.85256
GEGnETNNmVITWKPLR	High	112293279	N4(Deamidated); M9(Oxidation)	27.23	3	1975.97	5.44479
DIYTmmGQnVTLEcFALGNPVPDIR	High	227497226	M5(Oxidation); M6(Oxidation); N9(Deamidated); C14(Carbamidomethyl)	27.2	3	2887.34	3.52659
nGTVAVVEPEcEK	High	26986569	N1(Deamidated); C11(Carbamidomethyl)	27.12	2	1432.66	0.689937
DSTHIIPGDNPFnSSLVSLIR	High	154090989	N13(Deamidated)	27.04	3	2283.16	1.36685
IHVAGGTHSVnQTVnK	High	208609941	N11(Deamidated); N15(Deamidated)	27.02	2	1663.84	2.42593
AVISmLnETMNEAPEETK	High	7106409	M5(Oxidation); N7(Deamidated)	26.99	2	2023.93	6.15551
FYPEDLQLIWLENGnVSR	High	294997315	N15(Deamidated)	26.98	2	2194.09	3.11255
nHSLAFVGTK	High	171543899	N1(Deamidated)	26.96	2	1074.56	2.75584
TFASHnASGGSSAGLR	High	158937286	N6(Deamidated)	26.94	2	1520.72	4.27584
KGTVLcGPPPAVEnASLVGVR	High	40789268	C6(Carbamidomethyl); N14(Deamidated)	26.76	3	2122.14	3.38496
nGQGSNLDGGnYHVYEnGSLEIK	High	237858632;35215309	N1(Deamidated); N11(Deamidated); N17(Deamidated)	26.65	3	2468.1	6.19648
EQLQGInASSAAWAR	High	124487155	N7(Deamidated)	26.64	2	1602.79	3.36336
SDVGnYTcVVTNTVTNHK	High	157909807	N5(Deamidated); C8(Carbamidomethyl)	26.58	2	2009.93	2.9332
LTcEcEHnTTGPDcGK	High	254039711	C3(Carbamidomethyl); C5(Carbamidomethyl); N8(Deamidated); C14(Carbamidomethyl)	26.52	2	1879.73	2.42101
AIATDTVAnmSSGPEPPFFK	High	9055168	N9(Deamidated); M10(Oxidation)	26.5	2	2097	7.01139
InTTIGSVAAQDPDAAR	High	110347562	N2(Deamidated)	26.47	2	1700.85	5.43159
SVAQnYSSITHLHSIGK	High	189458849	N5(Deamidated)	26.41	3	1842.94	2.80697
KnGTFLTLR	High	170172540	N2(Deamidated)	26.29	2	1050.6	1.52817
nLSSVGSLmnGPSFTSK	High	110625972	N1(Deamidated); M9(Oxidation); N10(Deamidated)	26.28	2	1743.81	1.3049
GScVnNSEEKDVPK	High	34328113	C3(Carbamidomethyl); N5(Deamidated)	26.27	2	1563.7	2.26577
AVcmLSnTTAIAEAWAR	High	6678467;6678469	C3(Carbamidomethyl); M4(Oxidation); N7(Deamidated)	26.23	2	1881.91	11.6886
TnETQTYWGGSLPVHQK	High	31982591	N2(Deamidated)	26.2	2	1946.93	3.71295
nTSGSnQQAFLLENVPcNnAScEEVHR	High	268839462	N1(Deamidated); N6(Deamidated); C17(Carbamidomethyl); N19(Deamidated); C22(Carbamidomethyl)	26.05	3	3079.35	16.8499
nNSNNFDLNR	High	150378501	N1(Deamidated)	25.99	2	1208.53	2.22467
TEQLIIQAPnTSVHIYEPYPAGADVPFGPPLNK	High	89242146	N10(Deamidated)	25.97	3	3578.83	5.53455
LmnAPLYLAEWQnITK	High	238637279	M2(Oxidation); N3(Deamidated); N13(Deamidated)	25.67	2	1922.98	13.1655
SWSTVGncTAALR	High	160358829	N7(Deamidated); C8(Carbamidomethyl)	25.62	2	1423.67	3.94311
STEGQSSLTVTnVTEEHYGnYTcVAAnK	High	30425330	N12(Deamidated); N20(Deamidated); C23(Carbamidomethyl); N27(Deamidated)	25.61	3	3064.37	16.5558
AnASTFAVPSPVSNSADTR	High	31982223	N2(Deamidated)	25.57	2	1892.91	4.73927
SGGnATLQVDSWPVNER	High	327365337	N4(Deamidated)	25.56	2	1831.88	18.907
DVTVIEGEVATIScQVnK	High	71040107	C14(Carbamidomethyl); N17(Deamidated)	25.52	2	1962.97	2.16551
GLLTFVDHLPVTQVVVGDTnR	High	116063560	N20(Deamidated)	25.5	3	2282.23	11.1252
LEQnFFncScDIR	High	33413429	N4(Deamidated); N7(Deamidated); C8(Carbamidomethyl); C10(Carbamidomethyl)	25.47	2	1704.72	14.4441
nTTDVVNTmcGYK	High	110347498	N1(Deamidated); M9(Oxidation); C10(Carbamidomethyl)	25.38	2	1519.64	2.68515
GEGnETNnmVITWKPLR	High	112293279	N4(Deamidated); N8(Deamidated); M9(Oxidation)	25.33	2	1976.96	11.5272
TLSPTGnISSAPK	High	371121280	N7(Deamidated)	25.28	2	1273.67	2.50951
AFInGTGVETVVSADLPnAHGLAVDWVSR	High	124494256	N4(Deamidated); N18(Deamidated)	25.27	3	2997.52	7.2292
EVmNLLQPLnVTK	High	148232950	M3(Oxidation); N10(Deamidated)	25.08	2	1515.81	2.64508
LDLSnNnLTTLPR	High	41351537	N5(Deamidated); N7(Deamidated)	24.93	2	1472.78	17.0113
GDLNInmTSPmGTK	High	6679229	N6(Deamidated); M7(Oxidation); M11(Oxidation)	24.85	2	1511.67	1.43445
TLEnGVnVTVSQINTVLSGR	High	124248484	N4(Deamidated); N7(Deamidated)	24.66	2	2103.1	4.37691
AEGDVGPPPSTLInQnETFAK	High	27369644	N14(Deamidated); N16(Deamidated)	24.54	2	2187.07	9.67531
FYHITVSSSQPnSSNDnIQSITSGDWDVTK	High	312032384	N12(Deamidated); N17(Deamidated)	24.52	3	3330.55	17.0404
FVPNSNmnFTGQAYSGR	High	85719313	M7(Oxidation); N8(Deamidated)	24.44	2	1906.85	3.7783
VSHnASVDmcDLKK	High	312032400	N4(Deamidated); M9(Oxidation); C10(Carbamidomethyl)	24.43	3	1620.74	3.04703
DHGSPTLSAnVSmR	High	18087737	N10(Deamidated); M13(Oxidation)	24.42	2	1488.67	-0.29442
GYVnnSLSFFDLSELGmGK	High	189409057	N4(Deamidated); N5(Deamidated); M17(Oxidation)	24.39	2	2095.98	14.1964
KnASSVVPSSVHnSANQR	High	281182810	N2(Deamidated); N13(Deamidated)	24.28	3	1883.95	14.6894
EFILAPNDHFNnLPVnISLSDVQVPTNmYNK	High	6753236	N12(Deamidated); N16(Deamidated); M28(Oxidation)	23.89	3	3561.75	6.96577
IQDFnYTDHTLGR	High	124487263	N5(Deamidated)	23.88	3	1581.74	14.7583
YSIYKDPAGWLSInPInGTVDTTAVLDR	High	110625609	N14(Deamidated); N17(Deamidated)	23.85	3	3081.57	8.66091
DSGAPAHLESnATVR	High	260763908	N11(Deamidated)	23.72	2	1525.73	2.30148
IWnVTR	High	12963613	N3(Deamidated)	23.7	2	789.427	1.86103
LnLTTDPK	High	6677905	N2(Deamidated)	23.69	2	902.485	2.00725
EPSnATQLDGPAR	High	6753150	N4(Deamidated)	23.65	2	1356.64	3.16284
QnGSANSATNPAGLDK	High	16506279	N2(Deamidated)	23.61	2	1545.71	-0.309711
YSVQHmYFTYnLSDTEHFPNAISK	High	113195678	M6(Oxidation); N11(Deamidated)	23.6	3	2909.32	4.78245
VIYnLTEK	High	33469043	N4(Deamidated)	23.58	1	980.532	2.29287
GAAHSAEPGRDTIPGDPSSnATSR	High	6681281	N20(Deamidated)	23.44	3	2352.09	2.37143
IcTLVHTAmDSPmDLIATnITPTEALLQWK	High	226958549	C2(Carbamidomethyl); M9(Oxidation); M13(Oxidation); N19(Deamidated)	23.33	3	3417.7	11.0388
IcNQnSSNPYQR	High	117647249	C2(Carbamidomethyl); N5(Deamidated)	23.22	2	1481.65	1.43106
VDHESLnATPQVAmQVLEIHYTPSVK	High	225543375	N7(Deamidated); M14(Oxidation)	23.21	3	2924.46	10.0799
mYVTnDTEVAENNYEALKDFFR	High	84042523	M1(Oxidation); N5(Deamidated)	23.2	3	2686.21	3.75161
nLSFSEDGYQmHPK	High	117168299	N1(Deamidated); M11(Oxidation)	23.14	2	1669.72	2.79841
LQNnISYQmADIHHLK	High	158711675	N4(Deamidated); M9(Oxidation)	23.09	3	1941.95	2.28527
YSVQHmYFTYnLSDTEHFPnAISK	High	113195678	M6(Oxidation); N11(Deamidated); N20(Deamidated)	23.08	3	2910.32	9.18245
GNPKPALQWFYnGAILnESK	High	6679150	N12(Deamidated); N17(Deamidated)	23.02	3	2249.13	3.58662
TmnFTYEVHLVADGK	High	294997259	M2(Oxidation); N3(Deamidated)	22.86	3	1741.82	2.79325
AAEQIAGSFVYSIPFSTGTVnK	High	6753236	N21(Deamidated)	22.82	2	2288.16	5.32681
GVnVTmPSQPGVPPLSSTQLQIDPALQEFQLVDLSR	High	183979966	N3(Deamidated); M6(Oxidation)	22.75	3	3882.01	18.4739
GTEVnATVIGESDPIDEVQGFLFGK	High	236466498	N5(Deamidated)	22.62	2	2624.28	7.34907
VTnLSDPVVLTFQHQPQPK	High	312032400	N3(Deamidated)	22.62	3	2149.13	2.10255
VnGTLTQVLLVGAPTHDDVSK	High	111378397	N2(Deamidated)	22.51	3	2165.15	2.16799
NPNnNTIHPNLR	High	225637487	N4(Deamidated)	22.51	3	1404.7	1.61681
AmYVnLTLTGEPIR	High	124301217	M2(Oxidation); N5(Deamidated)	22.37	2	1594.82	3.15733
SPLPAAFTAnGTHLQHLAR	High	225690610	N10(Deamidated)	22.29	3	2003.05	2.19053
QPNmnLTQLK	High	34303979	M4(Oxidation); N5(Deamidated)	22.24	2	1203.61	1.88965
VIDLWDLAQSAnFTEK	High	63999380	N12(Deamidated)	21.89	2	1851.92	12.3247
SInLTLDR	High	165377150	N3(Deamidated)	21.85	2	932.507	2.38959
GNPAAYGITVTNHPmnK	High	110225379	M15(Oxidation); N16(Deamidated)	21.72	2	1801.86	1.95082
WNRGnESLPER	High	23346547	N5(Deamidated)	21.63	3	1358.65	1.97092
VNRFnSTEYQVVTR	High	124494256	N5(Deamidated)	21.59	2	1713.86	2.05915
NIYTEFPQLYnNSmVcSFLPEVIYK	High	9625018	N11(Deamidated); M14(Oxidation); C16(Carbamidomethyl)	21.54	3	3086.47	5.04413
ELAAAAnESAVK	High	117168301	N7(Deamidated)	21.52	2	1174.6	2.5479
AnASEGTFPncTGHcTHPR	High	116063560	N2(Deamidated); N10(Deamidated); C11(Carbamidomethyl); C15(Carbamidomethyl)	21.48	3	2115.87	2.23141
LLnTTDVYLLPSLnPDGFER	High	150378501	N3(Deamidated); N14(Deamidated)	21.44	2	2279.18	14.3851
GVFITnETGQPLIGK	High	226693369	N6(Deamidated)	21.32	2	1574.85	2.58941
INSDPTLLPnITLGcEIR	High	126116570	N10(Deamidated); C15(Carbamidomethyl)	21.29	2	2027.05	0.500444
VSmGQNGDLYFAnVLTSDnHSDYIcNAHFPGTR	High	112293279	M3(Oxidation); N13(Deamidated); N19(Deamidated); C25(Carbamidomethyl)	21.09	4	3718.63	4.43699
YPnQVYYRPVDQYSNQNnFVHDcVnITIK	High	506326231	N3(Deamidated); N18(Deamidated); C23(Carbamidomethyl); N25(Deamidated)	21.09	3	3591.7	14.0509
LEPnSVDPEnITEILIANQK	High	6679150	N4(Deamidated); N10(Deamidated)	21.06	2	2239.14	4.13321
NLADQGnQTAAIK	High	58037339	N7(Deamidated)	20.96	2	1344.68	1.37311
LTVnSSNSIK	High	110347545	N4(Deamidated)	20.88	2	1063.56	1.39477
SAFDPPnFPIcLLGnR	High	158711686	N7(Deamidated); C11(Carbamidomethyl); N15(Deamidated)	20.76	2	1819.9	15.1021
TcNPETFPLRnESLQcPTAR	High	312596932	C2(Carbamidomethyl); N11(Deamidated); C16(Carbamidomethyl)	20.74	3	2392.11	3.66567
YLnETQQLTQK	High	31982171	N3(Deamidated)	20.61	2	1367.69	18.2511
EYEGAVYPDnTTDFQR	High	110347564	N10(Deamidated)	20.59	2	1905.82	2.03968
FLEQQNQVLQTKWELLQQVnTSTR	High	51092293	N20(Deamidated)	20.59	3	2933.53	9.49714
VQPIVAVADEGWYILQnK	High	271397963	N17(Deamidated)	20.59	3	2044.08	1.39804
nnEGGVIAQLPSDVTSFnQTGLKPGEEYIVnVVALK	High	226958549	N1(Deamidated); N2(Deamidated); N18(Deamidated); N31(Deamidated)	20.46	3	3805.96	17.4051
nSmTPGnLSPGIYLcnATNR	High	159110562	N1(Deamidated); M3(Oxidation); N7(Deamidated); C15(Carbamidomethyl); N16(Deamidated)	20.45	3	2198.99	11.3454
TnIEGQVPFIPAnFTAHITPYK	High	84370361	N2(Deamidated); N13(Deamidated)	20.32	3	2461.27	17.9094
YVPFnGTK	High	237858632;35215309	N5(Deamidated)	20.31	1	926.464	2.38865
VILRPYLTPNNQGLYIFQGnSTVR	High	225637487	N20(Deamidated)	20.27	3	2765.5	13.8413
ITNWmPDSmnFSDVK	High	28565287	M5(Oxidation); M9(Oxidation); N10(Deamidated)	20.14	2	1817.78	4.62535
NVNFnGSAGTPVmFNK	High	60460877	N5(Deamidated); M13(Oxidation)	20.04	2	1713.8	5.71365
IISEnKTDEEPGYIKK	High	117168299	N5(Deamidated)	19.87	3	1864.96	1.06085
ESGLnmTLPEENQPVVFNHIYNIK	High	126722834	N5(Deamidated); M6(Oxidation)	19.84	3	2803.37	2.01791
nTSGSnQQAFLLENVPcNnAScEEVHR	High	268839462	N1(Deamidated); N6(Deamidated); C17(Carbamidomethyl); N19(Deamidated); C22(Carbamidomethyl)	19.84	3	3080.34	18.9821
ETWnnVTVWGSR	High	237858632;35215309	N4(Deamidated); N5(Deamidated)	19.82	2	1450.67	8.95019
VAGTAVSIScnVSDYEGPAQQDFEWFmYRPEAPATSLGIVSTK	High	32189434	C10(Carbamidomethyl); N11(Deamidated); M27(Oxidation)	19.81	4	4697.18	3.12757
IVnGSHYEYK	High	161086986	N3(Deamidated)	19.78	2	1210.58	2.22075
nLSFATIYDVLSTKPVLNK	High	9790019	N1(Deamidated)	19.62	3	2124.16	-0.369164
NVITNQTLNnDTVASSFLK	High	30911107	N10(Deamidated)	19.61	2	2081.04	1.31894
FANEYPnITR	High	150378501	N7(Deamidated)	19.26	2	1225.59	1.15205
FLEPYnDSIQAQK	High	7242138	N6(Deamidated)	19.13	3	1554.76	15.8532
InVSYTGERPSSNmVIVDVK	High	110347469	N2(Deamidated); M14(Oxidation)	19	3	2225.12	2.21703
RAnASTFAVPSPVSnSADTR	High	31982223	N3(Deamidated); N15(Deamidated)	18.99	2	2050.01	15.2471
ANQIVIPHnTTFQTEPTK	High	153791389	N9(Deamidated)	18.92	3	2040.05	3.04664
VQPmTASnWTLVmEGEWmLK	High	112817607	M4(Oxidation); N8(Deamidated); M13(Oxidation); M18(Oxidation)	18.91	2	2401.11	12.121
LEQNFFncScDIR	High	33413429	N7(Deamidated); C8(Carbamidomethyl); C10(Carbamidomethyl)	18.75	2	1703.72	2.49144
nSTFGSVEVFSLDPnK	High	31542362	N1(Deamidated); N15(Deamidated)	18.73	2	1742.84	15.0852
mALLQYGSQNQQQVAFPLTYnVTTIHEALER	High	22203747	M1(Oxidation); N21(Deamidated)	18.71	3	3582.8	17.4976
VELVPLPSWQPVGEnFTLScR	High	159110562	N15(Deamidated); C20(Carbamidomethyl)	18.5	3	2430.24	16.2479
nTTLYIDR	High	226958327	N1(Deamidated)	18.49	2	996.503	3.31157
TNIEGQVPFIPAnFTAHITPYK	High	84370361	N13(Deamidated)	18.46	3	2460.27	11.7423
VINFYAGAnQSmnVTcVGKR	High	7242138	N9(Deamidated); M12(Oxidation); N13(Deamidated); C16(Carbamidomethyl)	18.4	3	2248.06	9.56102
EnVSDPSLTITFGR	High	113195678	N2(Deamidated)	18.39	2	1536.76	3.87833
DVmQVAnTTmSSR	High	112983656	M3(Oxidation); N7(Deamidated); M10(Oxidation)	18.33	2	1473.64	15.1679
mIEnGSLSFLPTLR	High	20137008	M1(Oxidation); N4(Deamidated)	18.3	2	1594.83	8.4324
VDDEmPQHAVLSGPNLFINNLnK	High	71040107	M5(Oxidation); N22(Deamidated)	18.3	3	2583.26	9.35243
SFnATAERGEEmTLTcK	High	6754920	N3(Deamidated); M12(Oxidation); C16(Carbamidomethyl)	18.17	2	1961.87	4.63677
SYNPnDTcPAScAK	High	13384722	N5(Deamidated); C8(Carbamidomethyl); C12(Carbamidomethyl)	17.95	2	1585.63	0.304613
nLSDSLAR	High	224994186	N1(Deamidated)	17.92	1	876.444	2.46296
VFVYTPTTnYTLR	High	19527008	N9(Deamidated)	17.9	2	1575.81	2.07769
nETHSIcSAcDEScK	High	21313278	N1(Deamidated); C7(Carbamidomethyl); C10(Carbamidomethyl); C14(Carbamidomethyl)	17.8	2	1798.67	-0.0495712
LEPnSVDPEnITEILIAnQK	High	6679150	N4(Deamidated); N10(Deamidated); N18(Deamidated)	17.68	2	2240.14	10.3948
InTTSDEKDPTNPFR	High	150378458	N2(Deamidated)	17.65	2	1735.82	4.56807
SGQVEVnITEFPYTPTPEHGR	High	40254534	N7(Deamidated)	17.43	3	2359.13	4.13274
SILTVTnVTQEHFGnYTcVAANK	High	28893343	N7(Deamidated); N15(Deamidated); C18(Carbamidomethyl)	17.3	3	2569.23	4.08405
EDNPDKNPEAPLnVSR	High	6755466	N13(Deamidated)	17.29	2	1795.85	1.13518
ESLLPVTLQcnLTSSSHTLmYSYWTR	High	153945724	C10(Carbamidomethyl); N11(Deamidated); M20(Oxidation)	17.18	3	3105.49	12.1425
AnYSLQIYPDESHYFHSVALK	High	312032384	N2(Deamidated)	17.04	3	2483.2	5.04761
SnVSVEENVILEKPSHVELK	High	226437629	N2(Deamidated)	16.98	3	2251.19	2.52968
DLIPPHVnFSHLTTK	High	26986569	N8(Deamidated)	16.97	3	1719.91	2.03499
FYHITVSSSQPnSSNDNIQSITSGDWDVTK	High	312032384	N12(Deamidated)	16.84	3	3329.54	10.7784
VQPIVAVADEGWYILQnK	High	271397963	N17(Deamidated)	16.82	3	2045.09	13.2124
KGFcEADnSTVSEnNPEDWPVNTEGcmEK	High	407228369	C4(Carbamidomethyl); N8(Deamidated); N14(Deamidated); C26(Carbamidomethyl); M27(Oxidation)	16.57	3	3362.38	12.1005
NAIQAFGnGTDVNmSPK	High	84662783	N8(Deamidated); M14(Oxidation)	16.43	2	1780.82	3.38912
VVncSDPGSVEnAVR	High	124248566	N3(Deamidated); C4(Carbamidomethyl); N12(Deamidated)	16.42	2	1604.75	14.4893
LnTESnASTLLLDnSTFVTFK	High	238776842	N2(Deamidated); N6(Deamidated); N14(Deamidated)	16.4	2	2318.15	9.28533
VLTLAnFTTKDEGDYFcELQVSGANPmSSnK	High	6678347	N6(Deamidated); C17(Carbamidomethyl); M27(Oxidation); N30(Deamidated)	16.31	3	3455.59	10.0602
IFnIDSGnGSIFTSK	High	110347562	N3(Deamidated); N8(Deamidated)	16.1	2	1601.78	9.24843
nLTScPDGAPFIQHGPDYR	High	6680744	N1(Deamidated); C5(Carbamidomethyl)	16.09	3	2145.97	3.38652
TnLTTFNPSILEK	High	50053988	N2(Deamidated)	16.07	2	1478.78	3.94333
QGPQAGGTTLTInGTHLDTGSK	High	226958476	N13(Deamidated)	16.03	3	2156.07	9.11152
AncSVYEScVDcVLAR	High	254553358	N2(Deamidated); C3(Carbamidomethyl); C9(Carbamidomethyl); C12(Carbamidomethyl)	15.95	2	1903.81	3.53608
VEFDDKGnVITSYGNPILLnSSIPEDATIK	High	6754900	N8(Deamidated); N20(Deamidated)	15.93	3	3251.66	11.5618
nGVTHnFAVTSVGGLPVnETTLAEVLR	High	261244940	N1(Deamidated); N6(Deamidated); N18(Deamidated)	15.8	3	2798.45	8.70278
DnTTcYEFK	High	124494256	N2(Deamidated); C5(Carbamidomethyl)	15.68	2	1178.47	1.7841
TLFIFPQmnLSGTAESLNTVPITEYK	High	124486807	M8(Oxidation); N9(Deamidated)	15.66	3	2931.48	5.15578
TFDVSNFQnSSIK	High	33468873	N9(Deamidated)	15.56	2	1487.7	1.65735
VKGSQGQFPLTQnVTVVEGGTAILTcR	High	225543375	N13(Deamidated); C26(Carbamidomethyl)	15.45	3	2861.49	4.2869
LTFYGnWSEK	High	21704174	N6(Deamidated)	15.45	2	1245.58	4.79696
IVnISSPVAVnEGGnVNLLcLAVGRPEPTVTWR	High	257096063	N3(Deamidated); N11(Deamidated); N15(Deamidated); C20(Carbamidomethyl)	15.22	3	3534.87	12.3956
LHVAQPEnDSHVALLK	High	254028203	N8(Deamidated)	15.18	3	1771.94	2.45336
ESHnTSKGPEATWNLNK	High	82546885	N4(Deamidated)	15.17	3	1913.91	4.03469
LYWTDGDnISmAnmDGSnHTLLFSGQK	High	124494256	N8(Deamidated); M11(Oxidation); N13(Deamidated); M14(Oxidation); N18(Deamidated)	15.03	3	3050.34	13.1846
TLFPNYFnGSEIVIAGK	High	27369644	N8(Deamidated)	14.93	2	1870.96	2.96191
VKGSQGQFPLTQnVTVVEGGTAILTcR	High	225543375	N13(Deamidated); C26(Carbamidomethyl)	14.72	3	2863.51	19.114
FQISPQLQFSPEEVLGmVLnYSR	High	157951706	M17(Oxidation); N20(Deamidated)	14.4	3	2701.35	14.4832
YQAQnFTLVcIVSGGKPAPmVYFK	High	38348466	N5(Deamidated); C10(Carbamidomethyl); M20(Oxidation)	14.35	3	2735.37	5.55843
LLEFDSTnASEGAQPPGKPYPPYSLAK	High	9910458	N8(Deamidated)	14.32	3	2878.42	1.90793
VLTLAnFTTKDEGDYFcELQVSGAnPmSSnK	High	6678347	N6(Deamidated); C17(Carbamidomethyl); N25(Deamidated); M27(Oxidation); N30(Deamidated)	14.26	3	3456.58	13.5515
GmPNnFSEmPR	High	226874869	M2(Oxidation); N5(Deamidated); M9(Oxidation)	14.14	2	1312.53	2.21943
QVALQTFGnQTSIIPAGGAGYK	High	29244210	N9(Deamidated)	14.09	2	2223.16	11.9317
nIYTEFPQLYnNSmVcSFLPEVIYK	High	9625018	N1(Deamidated); N11(Deamidated); M14(Oxidation); C16(Carbamidomethyl)	13.99	3	3087.47	10.8521
SALDSFTLImQTYnR	High	254553485	M10(Oxidation); N14(Deamidated)	13.99	2	1777.86	13.5196
VSmGQnGDLYFAnVLTSDnHSDYIcnAHFPGTR	High	112293279	M3(Oxidation); N6(Deamidated); N13(Deamidated); N19(Deamidated); C25(Carbamidomethyl); N26(Deamidated)	13.82	4	3721.64	19.4172
AATcInPLnGSVcERPAnHSAK	High	87299635	C4(Carbamidomethyl); N6(Deamidated); N9(Deamidated); C13(Carbamidomethyl); N18(Deamidated)	13.78	3	2370.1	9.38082
SLEEIGIQnYSTTSScQAR	High	172088121	N9(Deamidated); C16(Carbamidomethyl)	13.61	2	2145.93	-14.4675
VSLQELPGSEHIEmLAnATTLAYLK	High	19527008	M14(Oxidation); N17(Deamidated)	13.53	3	2745.41	2.29103
GSALHEDIYVLHDnGTLEIPVAQK	High	225637535	N14(Deamidated)	13.43	3	2621.33	9.65449
FGTVPnGSTER	High	117168299;41680705	N6(Deamidated)	13.34	2	1165.55	2.25275
LVAnESVPFETScR	High	31981299	N4(Deamidated); C13(Carbamidomethyl)	13.28	2	1609.76	3.49561
VLTnQESPYQnHTGR	High	124286805	N4(Deamidated); N11(Deamidated)	13.25	3	1745.83	13.2327
LEDGFHPDAVAWAnLTNAIR	High	31560090	N14(Deamidated)	13.2	3	2211.09	2.93719
NGQGSNLDGGNYHVYEnGSLEIK	High	237858632;35215309	N17(Deamidated)	13.05	3	2467.1	1.15503
NVLGQPPDnTTLLK	High	124358961	N9(Deamidated)	13.01	2	1510.81	2.01169
RGDLNInmTSPmGTK	High	6679229	N7(Deamidated); M8(Oxidation); M12(Oxidation)	12.78	3	1667.77	0.825516
FYPEDLQLIWLEnGnVSR	High	294997315	N13(Deamidated); N15(Deamidated)	12.62	2	2196.08	13.3309
FDEVYDALAGAHPnLTVYK	High	271397963	N14(Deamidated)	12.32	3	2124.04	3.2133
KPGSFAnVTIDmcAIIDR	High	165377150	N7(Deamidated); M12(Oxidation); C13(Carbamidomethyl)	12.25	3	2024.98	2.94157
GAAAPSAPHWnETAEK	High	6752968	N11(Deamidated)	12.23	2	1637.76	3.22543
mASTFIGnSTAIQELFK	High		M1(Oxidation); N8(Deamidated)	12.22	2	1874.96	18.906
QGPQAGGTTLTInGTHLDTGSK	High	226958476	N13(Deamidated)	12.18	3	2155.06	0.962439
NLnFSTR	High	225637535	N3(Deamidated)	12.11	2	852.422	1.53978
YnAQPVGnWSDcILPEGK	High	259013354	N2(Deamidated); N8(Deamidated); C12(Carbamidomethyl)	12.04	2	2049.94	11.0025
ISTLTFFnVSEKDYGnYTcVATnK	High	51092272	N8(Deamidated); N16(Deamidated); C19(Carbamidomethyl); N23(Deamidated)	11.98	3	2775.3	12.1216
ILSQAPSTPSPnmFTInnETGDIITVAAGLDR	High	161760627	N12(Deamidated); M13(Oxidation); N17(Deamidated); N18(Deamidated)	11.84	3	3362.67	10.5216
KKEnGVFEEISnSSGR	High	153945724	N4(Deamidated); N12(Deamidated)	11.8	3	1782.85	0.596433
KDDEPLETTGDFnTTK	High	226437629	N13(Deamidated)	11.72	3	1811.82	2.18035
RAnASTFAVPSPVSNSADTR	High	31982223	N3(Deamidated)	11.64	2	2049.01	4.23672
NIYTEFPQLYnnSmVcSFLPEVIYK	High	9625018	N11(Deamidated); N12(Deamidated); M14(Oxidation); C16(Carbamidomethyl)	11.58	3	3088.47	16.8935
nGTEVVScHPQGSTAGVVYR	High	9055376	N1(Deamidated); C8(Carbamidomethyl)	11.56	3	2118.99	1.85693
mSATFIGnSTAIQELFK	High	33859488	M1(Oxidation); N8(Deamidated)	11.55	2	1874.96	18.906
mALLQYGSQNQQQVAFPLTYnVTTIHEALER	High	22203747	M1(Oxidation); N21(Deamidated)	11.51	3	3581.77	3.19064
FLnVTPnVEVNVEcR	High	7242138	N3(Deamidated); N7(Deamidated); C14(Carbamidomethyl)	11.43	3	1791.88	14.3698
GTnESEASSTQFTTEIDAPK	High	226958549	N3(Deamidated)	11.38	2	2114.95	11.298
QAALDPFVLQNLLPnSTDK	High	124486807	N15(Deamidated)	11.38	2	2085.09	3.8025
VmSWWDYGYQIAGmAnR	High	61651673	M2(Oxidation); M14(Oxidation); N16(Deamidated)	11.28	2	2081.9	11.1767
GPDLSncTSHWVNQLAQK	High	124486821	N6(Deamidated); C7(Carbamidomethyl)	11.13	3	2056.96	8.75724
ALVTLEGIPAAVPGQPAELQLnVTK	High	159110562	N22(Deamidated)	11.08	2	2531.43	13.3831
LEnITTGTYTIHAQK	High	227908803	N3(Deamidated)	10.94	2	1691.87	14.4167
GLnGSLQERPmGSR	High	153792501	N3(Deamidated); M11(Oxidation)	10.94	3	1518.74	2.43338
AnIQFGEnGTTISAVTNK	High	6680878	N2(Deamidated); N8(Deamidated)	10.91	2	1867.92	15.9221
LQAQDSGFYEcYTPSTDTQYLGnYSAK	High	32189434	C11(Carbamidomethyl); N23(Deamidated)	10.86	3	3110.37	18.6227
KTcNPETFPLRnESLQcPTAR	High	312596932	C3(Carbamidomethyl); N12(Deamidated); C17(Carbamidomethyl)	10.85	3	2520.21	4.32727
TcPLDEFQcnNTLcKPLAWK	High	124494256	C2(Carbamidomethyl); C9(Carbamidomethyl); N10(Deamidated); C14(Carbamidomethyl)	10.76	3	2496.14	2.61474
DEDAEnLGHFVmFPAnGSIDLmYFPYYGKK	High	7242138	N6(Deamidated); M12(Oxidation); N16(Deamidated); M22(Oxidation)	10.52	3	3502.59	12.1981
VTSEVLESnGSSSMASAcGGSLALmDAGVAVGLVTK	High	407261876	N9(Deamidated); C18(Carbamidomethyl); M25(Oxidation)	10.47	3	3472.69	10.7595
ITYVEnQTAmELEEQVTLTcEASGDPIPSITWR	High	124517683	N6(Deamidated); M10(Oxidation); C20(Carbamidomethyl)	10.46	3	3799.8	11.2878
ELPVLnVSLGPFSTSQVVAR	High	40254491	N6(Deamidated)	10.19	2	2114.15	1.46349

## Sheet: Test 2
N-glycopeptides identified from mouse brain after poly-(AA-co-hydrazide) enrichment
N-glycopeptide Sequence	Peptide Confidence	Protein Group Accessions	Modifications	IonScore	Charge	MH+ [Da]	ΔM [ppm]
LEDFNYNnQTITDQIYR	High	131888529	N8(Deamidated)	140.7	2	2148	3.99085
LLAnSSmLGEGQVLR	High	357588422	N4(Deamidated); M7(Oxidation)	130.61	2	1604.83	2.14483
TVVAPSTEGGLnLTSTFLR	High	119226208	N12(Deamidated)	130.11	2	1964.04	2.81196
GKAnSTGTLVITNPTR	High	227497226	N4(Deamidated)	128.58	2	1630.88	0.346527
GSQGQFPLTQnVTVVEGGTAILTcR	High	225543375	N11(Deamidated); C24(Carbamidomethyl)	125.36	2	2634.35	10.0364
YTcTAQTIVDnSSASADLVVR	High	227497226	C3(Carbamidomethyl); N11(Deamidated)	125.18	2	2272.08	2.99466
LDWLGncSGLNDDSYGYR	High	6753138	N6(Deamidated); C7(Carbamidomethyl)	124.8	2	2105.89	3.37589
GcmESINYnGVnITDLAR	High	165377150	C2(Carbamidomethyl); M3(Oxidation); N9(Deamidated); N12(Deamidated)	120.39	2	2044.9	2.53991
SPQSnGTSGVEQIcVDVR	High	295789082	N5(Deamidated); C14(Carbamidomethyl)	118.77	2	1933.9	4.82625
ALPGGTDnASAASAAGGSGPQR	High	36054013	N8(Deamidated)	112.48	2	1913.9	0.986895
DAmVGnYTcEVTELSR	High	6754382	M3(Oxidation); N6(Deamidated); C9(Carbamidomethyl)	108.62	2	1861.8	4.1429
GTnESEASSTQFTTEIDAPK	High	226958549	N3(Deamidated)	108.07	2	2113.95	4.20413
VSLTnVSISDEGR	High	71040107	N5(Deamidated)	107.72	2	1377.69	3.30687
ISnVTPADAGIYYcVK	High	294997315	N3(Deamidated); C14(Carbamidomethyl)	107.37	2	1771.86	3.40629
VINFYAGANQSmnVTcVGK	High	7242138	M12(Oxidation); N13(Deamidated); C16(Carbamidomethyl)	105.96	2	2089.97	2.72647
LTGALAGGGSAAGTSAnATK	High	223633888	N17(Deamidated)	105.51	2	1676.85	2.2275
IGPGEPLELLcnVSGALPPPGR	High	32189434	C11(Carbamidomethyl); N12(Deamidated)	105.08	2	2244.18	3.40359
ncTLLLSTLSPELGGK	High	6754614	N1(Deamidated); C2(Carbamidomethyl)	103.88	2	1703.89	2.42646
YTcTAQTIVDnSSASADLVVR	High	227497226	C3(Carbamidomethyl); N11(Deamidated)	102.73	2	2273.09	11.6363
TSDTGEEEAITnSTEAnGK	High	116014342	N12(Deamidated); N17(Deamidated)	102.14	2	1955.83	3.01255
VINFYAGAnQSmnVTcVGK	High	7242138	N9(Deamidated); M12(Oxidation); N13(Deamidated); C16(Carbamidomethyl)	100.78	2	2090.96	3.7142
LEPNSVDPEnITEILIANQK	High	6679150	N10(Deamidated)	99.13	2	2238.17	6.70163
VcTGnESLEENYVQDSK	High	166999785	C2(Carbamidomethyl); N5(Deamidated)	98.5	2	1972.85	2.5635
VGVNKnQTVTATFGYPFR	High	41282044	N6(Deamidated)	97.77	2	2000.03	4.05423
DADEGDTLAnSSDLLK	High	50950119	N10(Deamidated)	97.1	2	1664.75	2.85141
NSmTPGNLSPGIYLcnATNR	High	159110562	M3(Oxidation); C15(Carbamidomethyl); N16(Deamidated)	96.9	2	2197.01	4.86761
FAnYSImNLQNR	High	294997259	N3(Deamidated); M7(Oxidation)	96.49	2	1487.7	1.61246
LFnGQQGIIIQnFSTR	High	28893343	N3(Deamidated); N12(Deamidated)	96.46	2	1837.95	4.46091
AQnVSILTLcDATTGVcTK	High	312032384	N3(Deamidated); C10(Carbamidomethyl); C17(Carbamidomethyl)	96.34	2	2053	4.67822
GSQGQFPLTQnVTVVEGGTAILTcR	High	225543375	N11(Deamidated); C24(Carbamidomethyl)	95.77	2	2635.33	11.0027
NmANGQPHSVnITR	High	165377150	M2(Oxidation); N11(Deamidated)	95.55	2	1556.71	1.46259
ESGAnVTGFQLVnYTDTIPAR	High	356991208	N5(Deamidated); N13(Deamidated)	94.32	2	2255.09	4.91079
VIEEFYnQTWNHR	High	165377226	N7(Deamidated)	93.62	2	1736.81	3.5987
ISPGKnATGmEVGWYR	High	113199771	N6(Deamidated); M10(Oxidation)	93.38	2	1782.85	2.28066
IYAGmVSLmDEAVGnVTK	High	125656171	M5(Oxidation); M9(Oxidation); N15(Deamidated)	92.87	2	1930.92	2.52698
DEGDYFcELQVSGANPmSSnK	High	6678347	C7(Carbamidomethyl); M17(Oxidation); N20(Deamidated)	92.36	2	2364.97	4.61751
SnGSENNVLESQAGIQK	High	6680091	N2(Deamidated)	91.5	2	1775.84	1.40775
SISEnATATTEPK	High	254692970	N5(Deamidated)	91.29	2	1349.65	2.33434
FLnVTPNVEVNVEcR	High	7242138	N3(Deamidated); C14(Carbamidomethyl)	90.51	2	1790.88	1.67715
LLnATcDEYFTR	High	158711686	N3(Deamidated); C6(Carbamidomethyl)	90.5	2	1503.68	1.00283
VDQNDnTSLQWSNPAQQTLYFDDKK	High	225543375	N6(Deamidated)	89.85	3	2956.37	3.74221
TLAGEnQTALEIEELNR	High	153791270	N6(Deamidated)	88.68	2	1901.95	4.08063
THnLTNLNPDLQYR	High	112293279	N3(Deamidated)	88.62	2	1699.85	3.82021
SGGnATLQVDSWPVIER	High	226958327	N4(Deamidated)	88.42	2	1829.91	4.92129
FLEPYnDSIQAQK	High	7242138	N6(Deamidated)	87.7	2	1553.75	1.85289
AVISmLnETmNEAPEETK	High	7106409	M5(Oxidation); N7(Deamidated); M10(Oxidation)	87.3	2	2039.92	3.45371
VTQQSPTSmNQVnLTcR	High	294997315	M9(Oxidation); N13(Deamidated); C16(Carbamidomethyl)	87.14	2	1980.91	1.29321
YPGIFnSTTSDAFLQSK	High	31543926	N6(Deamidated)	86.98	2	1876.91	4.68946
FEnQTcFPLPDSR	High	197333685	N3(Deamidated); C6(Carbamidomethyl)	86.82	2	1611.71	1.37059
AFNISPnDTSSGScGINLVTLK	High	113195678	N7(Deamidated); C14(Carbamidomethyl)	86.68	2	2296.12	4.12287
VQnmSQSIEVLDR	High	84370353	N3(Deamidated); M4(Oxidation)	86.65	2	1535.74	3.44125
TnTSALLYDSLR	High	359807089	N2(Deamidated)	86.4	2	1354.69	3.28588
TQLTcSLnSSGVDIVGHR	High	116014342	C5(Carbamidomethyl); N8(Deamidated)	85.87	2	1944.95	4.04987
AGFEYAFDQLQNSnITR	High	291290989	N14(Deamidated)	85.79	2	1974.93	3.137
NNmEITWTPmnATSAFGPNLR	High	237858632;35215309	M3(Oxidation); M10(Oxidation); N11(Deamidated)	85.72	2	2398.1	6.12611
QTVEEEGGASSYnTSSK	High	226958549	N13(Deamidated)	85.53	2	1774.76	1.5723
NPEAGVATTDLYGncTLR	High	6679229	N14(Deamidated); C15(Carbamidomethyl)	85.51	2	1952.91	1.871
VLVAPPSEEAnTTK	High	7106409	N11(Deamidated)	85.46	2	1456.75	0.126395
FVPFSDQQISnDSSSSEnR	High	163792196	N11(Deamidated); N18(Deamidated)	85.22	2	2145.93	3.48425
IDSTGnVTNELR	High	87299635	N6(Deamidated)	84.97	2	1319.65	1.69469
GETASLLcnISVR	High	32189434	C8(Carbamidomethyl); N9(Deamidated)	84.82	2	1420.71	3.09973
EnGVFEEISnSSGR	High	153945724	N2(Deamidated); N10(Deamidated)	84.63	2	1526.67	3.423
NLINDYVSnQTQGmIK	High	309267120	N9(Deamidated); M14(Oxidation)	84.21	2	1854.9	4.49344
SSPDTQDLYcLnESSK	High	6679150	C10(Carbamidomethyl); N12(Deamidated)	84.16	2	1844.79	3.2026
LAVTnTTmTGTVLK	High	31981983	N5(Deamidated); M8(Oxidation)	83.99	2	1466.78	5.2464
SLEVLnLSSNK	High	226874869	N6(Deamidated)	83.86	2	1204.64	2.43869
AEFAVAnDTGFVDIPQQEK	High	6753558	N7(Deamidated)	82.83	2	2079.99	2.72889
ALAGLVYnSSGTEPcYDIYR	High	31981425	N8(Deamidated); C15(Carbamidomethyl)	82.81	2	2250.05	3.35759
DATIQAYLSSGnFSK	High	113195678	N12(Deamidated)	82.28	2	1602.77	3.38154
SDVPNTSPnSTSQHVAEFETER	High	124486807	N9(Deamidated)	81.65	2	2433.1	7.41229
VAFVLYNNLGPYLSTEnASmK	High	58037543	N17(Deamidated); M20(Oxidation)	81.57	2	2348.15	1.57427
AGPnGTLFVVDAYK	High	21313668	N4(Deamidated)	81.16	2	1452.74	2.18388
VLTNNPYnDSSLR	High	237858632	N8(Deamidated)	81.12	2	1493.73	1.69123
ASPIYELVTNnQTQR	High	46488926	N11(Deamidated)	80.86	2	1734.87	3.59597
YnLSEVLQGK	High	295390633	N2(Deamidated)	80.7	2	1151.6	2.94074
HEnNTKDNSIQHEFSLTR	High	6678347	N3(Deamidated)	80.62	2	2171.02	4.84049
EASnHSSGAGLVQINK	High	14916479	N4(Deamidated)	80.54	2	1612.8	2.67566
VIcTGPnDTSPGSPR	High	294997259	C3(Carbamidomethyl); N7(Deamidated)	80.46	2	1558.72	0.424359
IIISPEEnVTLTcTAENQLER	High	31791059	N8(Deamidated); C13(Carbamidomethyl)	80.43	2	2431.21	4.31586
LmNAPLYLAEWQnITK	High	238637279	M2(Oxidation); N13(Deamidated)	80.1	2	1921.98	3.01408
TILVDNNTWnNTHISR	High	148747128	N10(Deamidated)	80.09	2	1898.95	5.40883
ENGVFEEISnSSGR	High	153945724	N10(Deamidated)	79.79	2	1525.68	1.98975
GIAnLSNFIR	High	294997315	N4(Deamidated)	79.44	2	1105.6	2.15022
AAEDWTENPEPFnASFYR	High	291290989	N13(Deamidated)	79.08	2	2144.93	3.20942
VGmDGTnQSVVIETK	High	153792247	M3(Oxidation); N7(Deamidated)	79.07	2	1594.77	2.23531
TSDTGEEEAITnSTEAnGKYVVVSTPEK	High	116014342	N12(Deamidated); N17(Deamidated)	78.95	3	2958.37	5.12484
VQnVSQSmEVLELR	High	148747133	N3(Deamidated); M8(Oxidation)	78.15	2	1648.83	3.74558
LEnLSSTESGYTATLTR	High	226693369	N3(Deamidated)	78.12	2	1843.9	5.61529
KVLVAPPSEEAnTTK	High	7106409	N12(Deamidated)	77.64	2	1584.85	0.0395998
GVLmVGnETTYEDGHGAR	High	312596932	M4(Oxidation); N7(Deamidated)	76.68	2	1922.86	4.6633
FHVnYTQPLVAVK	High	7242138	N4(Deamidated)	76.64	2	1516.82	1.17829
KFHVnYTQPLVAVK	High	7242138	N5(Deamidated)	76.42	2	1644.91	2.20012
AEPPLnASAGDQEEK	High	157951706	N6(Deamidated)	76.35	2	1556.71	0.241562
nVETNnSTVLIEGK	High	312032384	N1(Deamidated); N6(Deamidated)	75.91	2	1519.75	-1.26442
ETWNnVTVWGSR	High	237858632;35215309	N5(Deamidated)	75.52	2	1449.68	1.55125
SYDnITGQSIVGcK	High	21450363	N4(Deamidated); C13(Carbamidomethyl)	75.51	2	1542.72	2.92479
DYGnYTcVATNK	High	51092272	N4(Deamidated); C7(Carbamidomethyl)	75.49	2	1406.59	3.28337
LEPnSVDPEnITEILIANQK	High	6679150	N4(Deamidated); N10(Deamidated)	74.87	2	2239.17	15.4725
TAADATGLQPILNQFTPAnVSR	High	154240716	N19(Deamidated)	74.79	2	2286.18	5.38222
nSTKEEILAALEK	High	225735655	N1(Deamidated)	74.52	2	1446.77	3.48495
FQLLnFSSSELK	High	71040107	N5(Deamidated)	74.41	2	1413.73	1.49938
LAWEGnETVTTR	High	158711686	N6(Deamidated)	74.29	2	1377.67	1.7206
FVSQTnGnLYIANVESSDRGnYScFVSSPSITK	High	227497226	N6(Deamidated); N8(Deamidated); N21(Deamidated); C24(Carbamidomethyl)	73.98	3	3644.69	6.481
LnGTDPIVAADSK	High	124494256	N2(Deamidated)	73.58	2	1301.66	3.34958
KEnGVFEEISnSSGR	High	153945724	N3(Deamidated); N11(Deamidated)	73.17	2	1654.75	-0.972623
LSDTAnYTcVAK	High	6678505	N6(Deamidated); C9(Carbamidomethyl)	73.16	2	1343.62	2.81075
FVSQTNGNLYIAnVESSDRGnYScFVSSPSITK	High	227497226	N13(Deamidated); N21(Deamidated); C24(Carbamidomethyl)	73.13	3	3643.7	2.86656
SDVPnTSPnSTSQHVAEFETER	High	124486807	N5(Deamidated); N9(Deamidated)	72.82	2	2434.1	15.2798
IAnISmEVGR	High	117168301	N3(Deamidated); M6(Oxidation)	72.68	2	1106.55	1.40762
FGTcSQLcnNTK	High	124494256	C4(Carbamidomethyl); C8(Carbamidomethyl); N9(Deamidated)	72.54	2	1430.61	2.30674
EALNQAVnTTR	High	124487155	N8(Deamidated)	72.28	2	1217.61	2.10602
FVSQTNGnLYIAnVESSDRGnYScFVSSPSITK	High	227497226	N8(Deamidated); N13(Deamidated); N21(Deamidated); C24(Carbamidomethyl)	72.04	3	3645.72	17.9285
LDWLGncSGLnDDSYGYR	High	6753138	N6(Deamidated); C7(Carbamidomethyl); N11(Deamidated)	71.62	2	2106.9	12.4672
ANELcAAESncSSR	High	84662783	C5(Carbamidomethyl); N10(Deamidated); C11(Carbamidomethyl)	71.36	2	1569.63	1.48614
GTEWLVnSSR	High	227497226	N7(Deamidated)	71.34	2	1149.56	1.79399
NVETnNSTVLIEGK	High	312032384	N5(Deamidated)	71.25	2	1518.77	1.55262
AVQLnETLGNQDK	High	117647249	N5(Deamidated)	71.15	2	1430.72	2.03268
ITnVSEEDSGEYFcLASNK	High	237858632;35215309	N3(Deamidated); C14(Carbamidomethyl)	70.69	2	2163.95	7.00279
ELLSnQSEVmLR	High	58037273	N5(Deamidated); M10(Oxidation)	70.64	2	1435.72	3.80665
LEDFnYNnQTITDQIYR	High	131888529	N5(Deamidated); N8(Deamidated)	70.2	2	2149	13.5854
AnSTGTLVITNPTR	High	227497226	N2(Deamidated)	70	2	1445.76	0.211601
AnATLLLGPLR	High	40789268	N2(Deamidated)	69.94	2	1139.68	2.2888
KENGVFEEISnSSGR	High	153945724	N11(Deamidated)	69.94	2	1653.78	3.38613
IQDFnYTDHTLGR	High	124487263	N5(Deamidated)	69.78	2	1580.74	3.35167
AVISmLnETMNEAPEETK	High	7106409	M5(Oxidation); N7(Deamidated)	69.67	2	2023.93	5.25082
AFnISPnDTSSGScGINLVTLK	High	113195678	N3(Deamidated); N7(Deamidated); C14(Carbamidomethyl)	69.27	2	2297.13	13.4175
IVSPEPGGAAGPnLTcR	High	357588422	N13(Deamidated); C16(Carbamidomethyl)	69.08	2	1696.84	2.47764
LTWSNAnGTASYR	High	208609941	N7(Deamidated)	68.76	2	1441.68	3.91199
FQDSSVFnETLR	High	514961954	N8(Deamidated)	68.52	2	1443.68	4.0511
VAGnQTSAVLR	High	117938277	N4(Deamidated)	68.33	2	1116.6	1.36595
WELLQQVnTSTR	High	51092293	N8(Deamidated)	67.81	2	1475.75	1.49682
SVLEnTTSYEEAK	High	9790019	N5(Deamidated)	67.76	2	1471.68	1.95664
VInFYAGAnQSmnVTcVGK	High	7242138	N3(Deamidated); N9(Deamidated); M12(Oxidation); N13(Deamidated); C16(Carbamidomethyl)	67.65	2	2091.96	11.4698
DGQLLPSSnYSNIK	High	124517683	N9(Deamidated)	67.63	2	1536.76	0.793439
ILIWEDGSLEINnITR	High	227497226	N13(Deamidated)	67.62	2	1886.99	3.93559
DGLALnLTLR	High	31982223	N6(Deamidated)	67.37	2	1086.62	2.80549
YSGVnmTGFR	High	163659879	N5(Deamidated); M6(Oxidation)	67.17	2	1148.51	2.60806
GnYScFVSSPSITK	High	227497226	N2(Deamidated); C5(Carbamidomethyl)	66.83	2	1547.71	1.78571
HLYTTTGGETDFTnVTSLR	High	34610211	N14(Deamidated)	66.83	2	2114.01	5.19331
LnGTDPIVAADSKR	High	124494256	N2(Deamidated)	66.57	2	1457.76	1.95464
LVDnGTLLYTmR	High	247269171	N4(Deamidated); M11(Oxidation)	66.53	2	1412.71	3.52835
ncSSITLQnITR	High	451898112	N1(Deamidated); C2(Carbamidomethyl); N9(Deamidated)	66.5	2	1408.68	2.62549
VELVAmnETDPK	High	117168299	M6(Oxidation); N7(Deamidated)	66.38	2	1362.65	2.59589
SLDNDNYVFTAPYFnK	High	161086902	N15(Deamidated)	65.87	2	1908.87	4.06682
TFAFISNQPGEGEAnSTR	High	30841016	N15(Deamidated)	65.83	2	1926.89	6.12572
FnSTEYQVVTR	High	124494256	N2(Deamidated)	65.59	2	1344.65	3.67347
LTScATnASmcGDEAR	High	124494256	C4(Carbamidomethyl); N7(Deamidated); M10(Oxidation); C11(Carbamidomethyl)	65.39	2	1760.69	-0.541096
EEnATIATYPEFGVLDLK	High	6680744	N3(Deamidated)	65.36	2	2011	3.97192
TAnETSAEAYNLLLR	High	153791270	N3(Deamidated)	65.3	2	1666.84	4.01434
AVISmLnETmnEAPEETK	High	7106409	M5(Oxidation); N7(Deamidated); M10(Oxidation); N11(Deamidated)	65.25	2	2040.9	1.95322
TnYTIDVYEmK	High	163792196	N2(Deamidated); M10(Oxidation)	65.03	2	1393.62	2.69808
ScVAITDAFPQnmSR	High	226958476	C2(Carbamidomethyl); N12(Deamidated); M13(Oxidation)	64.99	2	1713.77	6.1744
GnETIVNLIHSTR	High	22203763	N2(Deamidated)	64.69	2	1454.76	1.82949
NSAEnQTHQTFLTVEK	High	9055168	N5(Deamidated)	64.35	2	1847.88	2.54571
GYnVTYWWK	High	112293279	N3(Deamidated)	64.23	2	1217.57	2.45741
LAYATInDSR	High	312032384	N7(Deamidated)	64.16	2	1124.56	2.61215
IQFGGAnVSGFQIVDYDDSLVSK	High	85861220	N7(Deamidated)	64.01	2	2460.21	5.41789
GEnFTETDVK	High	506326231	N3(Deamidated)	63.71	2	1140.51	1.68047
TQLTcSLnSSGVDIVGHR	High	116014342	C5(Carbamidomethyl); N8(Deamidated)	63.68	2	1945.94	8.05886
KLNLDGSnYTLLK	High	124494256	N8(Deamidated)	63.52	2	1479.81	2.61142
SLWnmSAANNNIK	High	226874869	N4(Deamidated); M5(Oxidation)	63.45	2	1479.69	2.82015
DVmQVAnTTmSSR	High	112983656	M3(Oxidation); N7(Deamidated); M10(Oxidation)	63.4	2	1472.64	2.91509
NTNDNIQEcFnTTK	High	156105683	C9(Carbamidomethyl); N11(Deamidated)	63.36	2	1699.73	3.06734
LFNGQQGIIIQnFSTR	High	28893343	N12(Deamidated)	63.28	2	1836.97	4.73304
VFGSQnLTTVK	High	157951706	N6(Deamidated)	63.24	2	1194.64	2.14155
IAPASnVSHTVVLRPLK	High	13384850	N6(Deamidated)	63.19	2	1803.05	1.67944
FYHITVSSSQPnSSNDNIQSITSGDWDVTK	High	312032384	N12(Deamidated)	63.11	3	3328.53	3.19235
AYNTAGTGPSSLPVnVTTK	High	31980846	N15(Deamidated)	63.08	2	1878.95	3.55523
KnASSVVPSSVHNSANQR	High	281182810	N2(Deamidated)	63.06	3	1882.94	2.4483
IISEnKTDEEPGYIK	High	117168299	N5(Deamidated)	63.05	2	1736.87	3.99284
FNPIVnKTEIENVR	High	6680522	N6(Deamidated)	63	2	1673.89	2.91853
SFSGLLDcGncSR	High	161086902	C8(Carbamidomethyl); N10(Deamidated); C11(Carbamidomethyl)	62.85	2	1473.61	2.25935
VLTLAnFTTK	High	6678347	N6(Deamidated)	62.78	2	1108.63	1.78721
TcVSncTASQFVcK	High	124494256	C2(Carbamidomethyl); N5(Deamidated); C6(Carbamidomethyl); C13(Carbamidomethyl)	62.63	2	1662.69	0.566228
DGEAFEmnGTEDGR	High	110347545	M7(Oxidation); N8(Deamidated)	62.54	2	1544.58	2.03002
LQAQDSGFYEcYTPSTDTQYLGnYSAK	High	32189434	C11(Carbamidomethyl); N23(Deamidated)	62.53	3	3108.35	3.67692
APDSnSSSLLITTR	High	31560063	N5(Deamidated)	62.17	2	1462.74	2.346
QmVENFSPnQTK	High	237858632;35215309	M2(Oxidation); N9(Deamidated)	62.17	2	1439.65	0.480984
EQLFFnLSDPELR	High	112293279	N6(Deamidated)	62.05	2	1608.79	1.9514
VmHGGAnITGFQIVNNENPmVQQFIQR	High	163792196	M2(Oxidation); N7(Deamidated); M20(Oxidation)	62.03	3	3075.49	3.64736
KKEnGVFEEISnSSGR	High	153945724	N4(Deamidated); N12(Deamidated)	61.98	2	1782.85	1.97336
mTQESALIFPFLnK	High	16716503	M1(Oxidation); N13(Deamidated)	61.62	2	1655.84	2.43656
GQcAnGTcLcQEGYAGEDcSQR	High	226958549	C3(Carbamidomethyl); N5(Deamidated); C8(Carbamidomethyl); C10(Carbamidomethyl); C19(Carbamidomethyl)	61.59	2	2522.97	16.2127
mnGTEmNLEPGSR	High	54607084	M1(Oxidation); N2(Deamidated); M6(Oxidation)	61.44	2	1468.6	0.0411383
ALVTLEGIPAAVPGQPAELQLnVTK	High	159110562	N22(Deamidated)	61.37	2	2530.43	5.62445
LSGnLTLLR	High	6679389	N4(Deamidated)	61.3	2	987.586	2.4653
VTQQSPTSmNQVnLTcR	High	294997315	M9(Oxidation); N13(Deamidated); C16(Carbamidomethyl)	61.28	2	1982.91	15.6899
nLSFSEDGYQmHPK	High	117168299	N1(Deamidated); M11(Oxidation)	60.87	2	1669.72	3.23706
SISnmTSQEFVEK	High	131888529	N4(Deamidated); M5(Oxidation)	60.77	2	1516.69	1.21324
NPnGTVTVISR	High	40254534	N3(Deamidated)	60.58	2	1158.61	1.05223
IETILLnGTDR	High	124494256	N7(Deamidated)	60.55	2	1245.67	2.98755
GGnVTLPcK	High	162138936	N3(Deamidated); C8(Carbamidomethyl)	60.38	2	946.469	2.64805
YnYTEDPTILR	High	6679389	N2(Deamidated)	60.25	2	1385.66	1.94206
NELmLnSSLmR	High	344217723	M4(Oxidation); N6(Deamidated); M10(Oxidation)	60.22	2	1340.62	2.21558
QnITYLLK	High	226874869	N2(Deamidated)	60.21	2	993.564	2.11253
FAEInGSALcSYNIKPSEYTLTSK	High	227499988	N5(Deamidated); C10(Carbamidomethyl)	60.17	3	2694.31	4.47638
LTnVTFPTGQVSSFR	High	124248484	N3(Deamidated)	60.03	2	1654.85	3.08373
SEmmYGnETELK	High	124486807	M3(Oxidation); M4(Oxidation); N7(Deamidated)	60.01	2	1464.59	0.503065
LVVnISDLGYPK	High	422744224	N4(Deamidated)	59.92	2	1318.73	2.06839
DSYPDGnITWYR	High	31791059	N7(Deamidated)	59.92	2	1487.65	2.74759
KFHVnYTQPLVAVK	High	7242138	N5(Deamidated)	59.81	2	1645.92	14.8025
FFPYAnGTLSIR	High	112293279	N6(Deamidated)	59.59	2	1386.71	2.17944
VQnmSQSIEVLDR	High	84370353	N3(Deamidated); M4(Oxidation)	59.56	2	1536.72	-1.01403
AmYVnLTLTGEPIR	High	124301217	M2(Oxidation); N5(Deamidated)	59.4	2	1594.82	3.99929
LNLDGSnYTLLK	High	124494256	N7(Deamidated)	59.05	2	1351.72	3.85175
TVYLHAnQTGYPDPSSR	High	116875858	N7(Deamidated)	58.98	2	1906.9	2.99016
HmQnLTEEQPIEVK	High	117647249	M2(Oxidation); N4(Deamidated)	58.66	2	1712.82	1.37474
FVPFSDQQISnDSSSSEnR	High	163792196	N11(Deamidated); N18(Deamidated)	58.5	2	2146.92	9.10824
SLWnmSAANnNIK	High	226874869	N4(Deamidated); M5(Oxidation); N10(Deamidated)	58.43	2	1480.68	2.15387
ncTIESTTFYNTDLYK	High	157909825	N1(Deamidated); C2(Carbamidomethyl)	58.38	2	1970.88	4.44968
FInSTFLEQK	High	157909825	N3(Deamidated)	58.29	2	1227.63	2.11312
ISTLTFFnVSEK	High	51092272	N8(Deamidated)	57.93	2	1386.72	2.08253
WTGHnVTVVQR	High	124494256	N5(Deamidated)	57.9	2	1297.67	2.2848
DEGDYFcELQVSGANPmSSnK	High	6678347	C7(Carbamidomethyl); M17(Oxidation); N20(Deamidated)	57.8	2	2365.98	14.3638
LNnITNIGPLDmK	High	188035856	N3(Deamidated); M12(Oxidation)	57.68	2	1459.75	1.47718
GPDLSncTSPWVNQVAQK	High	157739867	N6(Deamidated); C7(Carbamidomethyl)	57.56	2	2001.94	5.41086
mVVTLTELPSGnDTSGLEnK	High	85861220	M1(Oxidation); N12(Deamidated); N19(Deamidated)	57.54	2	2123.02	5.76059
KDDEPLETTGDFnTTK	High	226437629	N13(Deamidated)	57.28	2	1811.82	-0.439828
NSmTPGnLSPGIYLcnATNR	High	159110562	M3(Oxidation); N7(Deamidated); C15(Carbamidomethyl); N16(Deamidated)	57.25	2	2198.02	16.3581
LnASIADLQSK	High	124487155	N2(Deamidated)	56.96	2	1160.62	2.39577
AGVnYTLQVYPDEGYHISDK	High	238776842	N4(Deamidated)	56.87	3	2270.07	4.66249
nnVTEIQGIPGAASGLIK	High	158711686	N1(Deamidated); N2(Deamidated)	56.8	2	1783.95	4.41289
nVSYnISSTVR	High	294997315	N1(Deamidated); N5(Deamidated)	56.69	2	1241.6	2.7725
GIAnLSnFIR	High	294997315	N4(Deamidated); N7(Deamidated)	56.54	2	1106.59	3.02429
VInDTWAWK	High	157951706	N3(Deamidated)	56.54	2	1133.57	3.04379
InYTINImELK	High	85861220	N2(Deamidated); M8(Oxidation)	56.43	2	1368.71	2.63982
GVTHLnISGLK	High	124494256	N6(Deamidated)	56.4	2	1139.64	2.09487
LTnVTRPTGVVTSLHR	High	154090989	N3(Deamidated)	56.15	3	1751.98	2.62723
VNASTTDPnSTVEQSALTR	High	114326497	N9(Deamidated)	56.06	2	1991.95	0.924474
YTSDPnVTSVGPSK	High	225690610	N6(Deamidated)	55.89	2	1452.69	2.28468
ASVDVFGnR	High	110347502	N8(Deamidated)	55.8	2	965.471	2.3383
YIInGSHAnETR	High	226437629	N4(Deamidated); N9(Deamidated)	55.78	2	1376.65	0.951618
LLnLTSPEATAK	High	161484610	N3(Deamidated)	55.75	2	1258.69	3.23626
LnYSLPTGQSmEVQLPK	High	126722834	N2(Deamidated); M11(Oxidation)	55.64	2	1921.96	2.76068
AEAVGETLTLPGLVSADnGTYTcEAANK	High	23346547	N18(Deamidated); C23(Carbamidomethyl)	55.62	2	2853.37	8.89971
DFLnYTLEER	High	261862282	N4(Deamidated)	55.48	2	1300.61	3.30121
WInDTVVVYK	High	238776842	N3(Deamidated)	55.46	2	1237.65	3.49458
nYTVVmSTR	High	282165729	N1(Deamidated); M6(Oxidation)	55.39	2	1087.51	1.53869
GGNVLLncSAESDR	High	117168295	N7(Deamidated); C8(Carbamidomethyl)	55.38	2	1492.67	2.86499
NcnLTQIGGLIDSK	High	163659879;124487364	C2(Carbamidomethyl); N3(Deamidated)	55.28	2	1533.76	3.1423
EnGTDAVQEEEESPAEGSK	High	157951706	N2(Deamidated)	54.69	2	2006.84	4.18856
LSnLTEGmLR	High	62990174	N3(Deamidated); M8(Oxidation)	54.65	2	1150.58	1.80866
LSLSEnYTLSIANAK	High	31791059	N6(Deamidated)	54.49	2	1624.85	3.10841
TVVTEAGNLLKDnATQEEILHYLEK	High	225735655	N13(Deamidated)	54.47	3	2829.46	2.1133
DEDAENLGHFVmFPAnGSIDLmYFPYYGK	High	7242138	M12(Oxidation); N16(Deamidated); M22(Oxidation)	54.27	3	3373.48	4.05478
TAnHSAPSLENSVQPGK	High	224994186	N3(Deamidated)	54.23	2	1737.85	3.63549
KmLSAFnATSGK	High	31560063	M2(Oxidation); N7(Deamidated)	54.12	2	1271.63	1.51247
GcKDnATDSVPLR	High	124494256	C2(Carbamidomethyl); N5(Deamidated)	53.9	2	1433.67	1.2783
VPPGDTPPGnGSGPR	High	12667794	N10(Deamidated)	53.88	2	1405.67	2.76796
YSGVnLTGFR	High	124487364	N5(Deamidated)	53.86	2	1114.55	1.09046
QSnGSIAVISSLAGK	High	113680741	N3(Deamidated)	53.7	2	1432.77	1.74762
mLSAFnATSGK	High	31560063	M1(Oxidation); N6(Deamidated)	53.59	2	1143.54	2.00152
VQnmSQSIEVLNLR	High	23618873	N3(Deamidated); M4(Oxidation)	53.35	2	1647.84	0.421069
DIILHSTGHnISR	High	27370240	N10(Deamidated)	53.24	2	1463.76	1.25921
InGSAVIDSScVPVNK	High	203099104	N2(Deamidated); C11(Carbamidomethyl)	53.18	2	1660.83	4.23361
VWDTAAALnR	High	254588052	N9(Deamidated)	53.04	2	1117.57	2.34839
IYnASELPVR	High	41351529	N3(Deamidated)	52.99	2	1162.61	2.17894
GnITEYQcHQYITK	High	6677905	N2(Deamidated); C8(Carbamidomethyl)	52.8	2	1755.8	2.09453
IKTPEKnDTAAAGQGER	High	154240716	N7(Deamidated)	52.78	2	1786.89	0.703684
VPYNVGPGFAGnFSTQK	High	228008367	N12(Deamidated)	52.6	2	1783.88	6.9061
DLGPALAnSSHDVK	High	116734815	N8(Deamidated)	52.58	2	1424.7	1.8277
AVISmLnETmNEAPEETKIVIK	High	7106409	M5(Oxidation); N7(Deamidated); M10(Oxidation)	52.56	3	2493.25	2.43387
GELnSTLFSSRPK	High	13385294	N4(Deamidated)	52.47	2	1436.74	4.01931
FINYnQTVSR	High	85861260	N5(Deamidated)	52.32	2	1242.61	1.2919
NGQGSNLDGGNYHVYEnGSLEIK	High	237858632;35215309	N17(Deamidated)	52.19	3	2467.11	4.79174
IGTWDPSSGLnmTESQK	High	163659879	N11(Deamidated); M12(Oxidation)	52.07	2	1867.85	4.1258
VDnSSLTGESEPQTR	High	21450321;30409956	N3(Deamidated)	51.94	2	1620.76	13.7654
KVIcTGPnDTSPGSPR	High	294997259	C4(Carbamidomethyl); N8(Deamidated)	51.92	2	1686.82	2.20173
GSQGFLnGSEVSDLLR	High	257467657	N7(Deamidated)	51.88	2	1679.84	6.94436
ENScmVYnDTTmVcR	High	6679389	C4(Carbamidomethyl); M5(Oxidation); N8(Deamidated); M12(Oxidation); C14(Carbamidomethyl)	51.83	2	1912.73	4.27065
mHLnGSNVQVLHR	High	124494256	M1(Oxidation); N4(Deamidated)	51.81	2	1521.76	1.6507
LAYSGIPLnLTLDNR	High	6679911	N9(Deamidated)	51.71	2	1660.9	3.90931
IYNTPSASYLEVTPDSENDFGNYncTAVNR	High	124517683	N24(Deamidated); C25(Carbamidomethyl)	51.66	3	3412.5	3.88171
FAVLANNNLQILNInK	High	6754920	N15(Deamidated)	51.64	2	1800.01	3.47261
IHVAGGTHSVnQTVnK	High	208609941	N11(Deamidated); N15(Deamidated)	51.6	2	1663.84	1.47217
SAEGTFFInK	High	67514549	N9(Deamidated)	51.52	2	1114.54	2.61442
TDcDSSTASLcSFPVAnVSLAK	High	236465189	C3(Carbamidomethyl); C11(Carbamidomethyl); N17(Deamidated)	51.42	2	2331.06	6.13375
AYnSAGTGPSSATVnVTTR	High	157909807	N3(Deamidated); N15(Deamidated)	51.05	2	1855.86	-2.44685
VDQnDnTSLQWSNPAQQTLYFDDKK	High	225543375	N4(Deamidated); N6(Deamidated)	50.96	3	2957.37	8.87745
FnPIVnKTEIENVR	High	6680522	N2(Deamidated); N6(Deamidated)	50.72	2	1674.9	15.4482
InFTAPFNPNK	High	32469489	N2(Deamidated)	50.63	2	1263.64	2.23856
SVDFnRGTDnITVR	High	30425330	N5(Deamidated); N10(Deamidated)	50.62	2	1595.77	1.97355
LSQALGnITVVQK	High	298676452	N7(Deamidated)	50.55	2	1371.79	3.61927
DYYPInESLASLPLR	High	103472025	N6(Deamidated)	50.39	2	1751.89	2.90373
nATGmEVGWYR	High	113199771	N1(Deamidated); M5(Oxidation)	49.71	2	1300.57	2.96303
WSYnNSETSR	High	61656194	N4(Deamidated)	49.7	2	1244.52	1.09708
STEGQSSLTVTnVTEEHYGNYTcVAAnK	High	30425330	N12(Deamidated); C23(Carbamidomethyl); N27(Deamidated)	49.62	3	3063.38	13.8737
SLTQGSLIVGNLAPVnGTSQGK	High	183979966	N16(Deamidated)	49.38	2	2142.15	3.98756
EAIPQFSAAQKPLLSLEETLnVTER	High	157952224	N21(Deamidated)	49.37	3	2785.47	3.92257
AnQTALcGGGVQTR	High	259013354	N2(Deamidated); C7(Carbamidomethyl)	49.24	2	1433.68	0.682608
AGVnYTLQVYPDEGYHISDK	High	238776842	N4(Deamidated)	48.95	3	2271.07	11.0267
SDLnPAnGSYPFQALHQR	High	31560090	N4(Deamidated); N7(Deamidated)	48.91	2	2016.97	14.2952
LVnSTFLHNK	High	11528518	N3(Deamidated)	48.9	2	1173.63	2.48008
QTLFFnGTR	High	23346547	N6(Deamidated)	48.74	2	1084.54	1.96564
NmANGQPHSVnITR	High	165377150	M2(Oxidation); N11(Deamidated)	48.56	2	1555.73	2.09587
SDLNPAnGSYPFQALHQR	High	31560090	N7(Deamidated)	48.45	2	2015.96	1.52945
AHNELGTnSTSLR	High	238859616	N8(Deamidated)	48.27	2	1400.68	1.52724
ANIQFGEnGTTISAVTNK	High	6680878	N8(Deamidated)	48.11	2	1865.93	4.10568
NALGTAnQTInGHFLK	High	33413429	N7(Deamidated); N11(Deamidated)	47.68	2	1700.86	0.995246
VNTLEEGKGGPKnDTEER	High	6679120	N13(Deamidated)	47.5	2	1973.95	3.18043
LDnYSTQELGR	High	6754900	N3(Deamidated)	47.49	2	1296.61	3.71776
QGnASDVILR	High	58037273	N3(Deamidated)	47.37	2	1073.56	1.9554
IVSNncTDGLR	High	23956144	N5(Deamidated); C6(Carbamidomethyl)	47.25	2	1249.59	2.12734
VPAELnGSmYR	High	38348466	N6(Deamidated); M9(Oxidation)	47.19	2	1253.59	3.74434
DVnYTQIVVDR	High	49274623	N3(Deamidated)	47.18	2	1322.66	2.60057
LnYTLVGEPLR	High	132626295	N2(Deamidated)	47.01	2	1275.7	3.354
WNRGnESLPER	High	23346547	N5(Deamidated)	46.88	3	1358.65	2.17308
VnYTmDVFELK	High	164419755	N2(Deamidated); M5(Oxidation)	46.72	2	1375.65	2.14046
nPEAGVATTDLYGncTLR	High	6679229	N1(Deamidated); N14(Deamidated); C15(Carbamidomethyl)	46.72	2	1953.91	13.2368
LFNGQQGIIIQnFSTR	High	28893343	N12(Deamidated)	46.4	2	1838.95	13.6814
SInVTGQGFSLIQK	High	226958476	N3(Deamidated)	46.28	2	1492.8	2.32947
NFPDAFENNnVTK	High	189458849	N10(Deamidated)	46.25	2	1510.68	2.2814
FLEPYnDSIQAQKnDVcRPGR	High	7242138	N6(Deamidated); N14(Deamidated); C17(Carbamidomethyl)	46.23	3	2509.18	2.25829
INSDPTLLPnITLGcEIR	High	126116570	N10(Deamidated); C15(Carbamidomethyl)	46.22	2	2027.06	5.07719
VDVmnSTLVK	High	110347545	M4(Oxidation); N5(Deamidated)	46.03	2	1122.57	1.02526
STEGQSSLTVTNVTEEHYGnYTcVAAnK	High	30425330	N20(Deamidated); C23(Carbamidomethyl); N27(Deamidated)	46	3	3062.38	7.24374
nVTYGTYLDDPDPDDGFNYK	High	41282022	N1(Deamidated)	45.95	2	2309.99	8.37898
TVNSLnVSAISIPEHDEADDISDENR	High	31791059	N6(Deamidated)	45.79	3	2841.31	2.92565
nSTIQAANLAGLK	High	30089677	N1(Deamidated)	45.7	2	1301.71	4.09769
TVnSLnVSAISIPEHDEADDISDENR	High	31791059	N3(Deamidated); N6(Deamidated)	45.7	3	2842.32	10.9747
nNSNNFDLNR	High	150378501	N1(Deamidated)	45.64	2	1208.53	2.12366
LIASnITETmR	High	89242146	N5(Deamidated); M10(Oxidation)	45.64	2	1265.64	2.72452
RTnYTIDVYEmK	High	163792196	N3(Deamidated); M11(Oxidation)	45.63	2	1549.73	3.89337
ITEGVnVTQK	High	110347545	N6(Deamidated)	45.55	2	1089.58	1.44138
EETLLYDnATSSVADR	High	27370240	N8(Deamidated)	45.48	2	1784.83	4.02498
nGGnATLQVDNWPVNEHYPTGNTDNER	High	355390246	N1(Deamidated); N4(Deamidated)	45.19	3	3014.33	3.75596
NPcTSEQncTSPFSYK	High	45504394	C3(Carbamidomethyl); N8(Deamidated); C9(Carbamidomethyl)	45.02	2	1920.79	7.02619
DLDTDFTSnASQPETK	High	150378501	N9(Deamidated)	44.75	2	1769.78	3.18445
QTFPVPQnISQR	High	6680091	N8(Deamidated)	44.66	2	1415.73	4.15536
nETHSIcSAcDEScK	High	21313278	N1(Deamidated); C7(Carbamidomethyl); C10(Carbamidomethyl); C14(Carbamidomethyl)	44.61	2	1798.67	1.51137
LLNnLTSIK	High	153791270	N4(Deamidated)	44.61	2	1016.6	2.10441
AFmnSSFTIDPK	High	27734847	M3(Oxidation); N4(Deamidated)	44.59	2	1374.63	3.56598
AmEnESEVTGYK	High	117938277	M2(Oxidation); N4(Deamidated)	44.57	2	1374.57	1.08993
LSPYVnYSFR	High	225637535	N6(Deamidated)	44.45	2	1246.61	2.04816
ANYNLPImVTDSGKPPmTnITDLR	High	110625609	M8(Oxidation); M17(Oxidation); N19(Deamidated)	44.31	3	2694.32	4.0695
DLNLmnVTWK	High	226437629	M5(Oxidation); N6(Deamidated)	44.26	2	1250.61	2.20966
EATIVGEnETYPR	High	46309573	N8(Deamidated)	44.23	2	1479.7	0.644627
ETWnnVTVWGSR	High	237858632;35215309	N4(Deamidated); N5(Deamidated)	44.08	2	1450.66	2.30256
LHVAQPEnDSHVALLK	High	254028203	N8(Deamidated)	44.02	3	1771.94	1.83334
KLVQVGIYnGTHVIPNDR	High	294997259	N9(Deamidated)	44.01	3	2024.1	2.66053
LQNnISYQmADIHHLK	High	158711675	N4(Deamidated); M9(Oxidation)	43.95	3	1941.95	2.66243
ENSKQnGSANSATNPAGLDK	High	16506279	N6(Deamidated)	43.83	2	2003.94	4.50971
SLQDAATQLNTnLSSVR	High	254675312	N12(Deamidated)	43.76	2	1818.93	7.63402
nSmTPGnLSPGIYLcNATnR	High	159110562	N1(Deamidated); M3(Oxidation); N7(Deamidated); C15(Carbamidomethyl); N19(Deamidated)	43.76	2	2198.98	6.96614
AnSTGILSVR	High	54607084	N2(Deamidated)	43.51	2	1018.55	1.60288
NnmEITWTPmnATSAFGPNLR	High	237858632;35215309	N2(Deamidated); M3(Oxidation); M10(Oxidation); N11(Deamidated)	43.49	2	2399.1	14.4143
FWLVEGnSSR	High	40254254	N7(Deamidated)	43.48	2	1195.58	1.22442
nETIWYVR	High	19526978	N1(Deamidated)	43.46	2	1081.53	2.46487
VGVNKnQTVTATFGYPFR	High	41282044	N6(Deamidated)	43.37	2	2001.03	11.8571
ALSPnSTISSAPK	High	168693641	N5(Deamidated)	43.28	2	1273.67	1.64693
SGGnATLQVDSWPVNER	High	327365337	N4(Deamidated)	43.22	2	1830.87	5.72005
DIYTmmGQnVTLEcFALGNPVPDIR	High	227497226	M5(Oxidation); M6(Oxidation); N9(Deamidated); C14(Carbamidomethyl)	43.18	3	2887.35	4.85834
EIcSGnSSQcAPNVHK	High	56790900	C3(Carbamidomethyl); N6(Deamidated); C10(Carbamidomethyl)	42.98	2	1788.77	1.5351
IVDVnLTSEGK	High	19111162	N5(Deamidated)	42.75	2	1175.62	1.91906
LAAPnLTVEEGK	High	6679150	N5(Deamidated)	42.42	2	1242.66	2.13141
IVASDSGKPSLnQTALVR	High	422744224	N12(Deamidated)	42.32	2	1857.02	4.61797
QVALQTFGnQTSIIPAGGAGYK	High	29244210	N9(Deamidated)	42.3	2	2223.16	12.92
YYHGELSYLnVTR	High	6753556	N10(Deamidated)	42.29	2	1615.78	2.54063
nESLETYPLmmK	High	6753138	N1(Deamidated); M10(Oxidation); M11(Oxidation)	42.25	2	1488.66	1.79612
NSYQLcNnGTLR	High	154090989	C6(Carbamidomethyl); N8(Deamidated)	42.19	2	1440.65	-0.105035
LTEFTHnSTmDYK	High	109627652	N7(Deamidated); M10(Oxidation)	42.12	2	1603.7	2.50772
DITNLInnTFIR	High	34610211	N7(Deamidated); N8(Deamidated)	42.08	2	1435.77	17.7207
LIPLGVFTGLSnLTK	High	30841016	N12(Deamidated)	42.02	2	1573.92	2.35485
YLnETQQLTQK	High	31982171	N3(Deamidated)	41.88	2	1366.69	3.26435
EmLPFWmnSTGK	High	28893409	M2(Oxidation); M7(Oxidation); N8(Deamidated)	41.71	2	1473.64	1.50212
VnSSLHSQISR	High	153791270	N2(Deamidated)	41.67	2	1228.63	2.1044
TnETQTYWGGSLPVHQK	High	31982591	N2(Deamidated)	41.46	2	1946.93	3.02326
NYAIIKPIGFnETTK	High	124249086	N11(Deamidated)	41.31	2	1709.92	4.14584
LNKFLEPYnDSIQAQK	High	7242138	N9(Deamidated)	41.26	3	1908.98	5.37753
LYWISSGnHTINR	High	124494256	N8(Deamidated)	41.09	2	1561.78	3.51541
LnFTGPGEPDSLR	High	111607447	N2(Deamidated)	41.02	2	1403.68	2.0986
VIEEFYnQTWNHR	High	165377226	N7(Deamidated)	41	2	1737.81	16.0256
GnISSAPAPAmPTALHSK	High	36054013	N2(Deamidated); M11(Oxidation)	40.9	2	1766.88	1.48644
SnISILR	High	161760627	N2(Deamidated)	40.8	2	803.463	1.55478
SnLTVLR	High		N2(Deamidated)	40.8	2	803.463	1.55478
YnGSLTTPNcDETVIWTVYK	High	6671678	N2(Deamidated); C10(Carbamidomethyl)	40.76	2	2362.1	2.08689
SPQSnGTSGVEQIcVDVR	High	295789082	N5(Deamidated); C14(Carbamidomethyl)	40.71	2	1934.9	14.2202
LnQASFHTPPnVSVcDVNWEK	High	41282044	N2(Deamidated); N11(Deamidated); C15(Carbamidomethyl)	40.69	3	2444.15	12.5405
LVGcPPGGAGGnDTELIAcLR	High	13928664	C4(Carbamidomethyl); N12(Deamidated); C19(Carbamidomethyl)	40.65	2	2128.03	6.60035
VYInDSVELSR	High	9845246	N4(Deamidated)	40.59	2	1295.65	3.05923
nVTALLmEAR	High	294997259	N1(Deamidated); M7(Oxidation)	40.5	2	1134.59	2.51226
AnTTQPGIVEGGQVLK	High	154240716	N2(Deamidated)	40.44	2	1612.86	3.49163
LNQASFHTPPnVSVcDVNWEK	High	41282044	N11(Deamidated); C15(Carbamidomethyl)	40.44	3	2443.14	3.03041
LSSSPnVTIScK	High	111378397	N6(Deamidated); C11(Carbamidomethyl)	40.44	2	1293.64	2.92858
nQSVGDPNVDLIR	High	6680878	N1(Deamidated)	40.38	2	1427.72	1.71331
InYTcNQGYR	High	52426750	N2(Deamidated); C5(Carbamidomethyl)	40.38	2	1289.56	1.7812
nVTDTFKR	High	169790905	N1(Deamidated)	40.36	2	981.502	2.13499
WYSAGLASnSSWFR	High	119226208	N9(Deamidated)	40.33	2	1632.75	3.96304
TLFLFPnQTGFPSK	High	157951690	N7(Deamidated)	40.26	2	1597.83	3.33652
ELGVVmYncScLAR	High	7242181	M6(Oxidation); N8(Deamidated); C9(Carbamidomethyl); C11(Carbamidomethyl)	40.2	2	1688.75	1.32358
FAEInGSALcSYnIKPSEYTLTSK	High	227499988	N5(Deamidated); C10(Carbamidomethyl); N13(Deamidated)	40.14	3	2695.3	5.35522
nSTLcDLcIGPLK	High	20330802	N1(Deamidated); C5(Carbamidomethyl); C8(Carbamidomethyl)	40.04	2	1491.72	3.23435
InGTDVDIGmDFR	High	157909807	N2(Deamidated); M10(Oxidation)	40	2	1469.66	1.2392
IIAAnNSGTFK	High	110347545	N5(Deamidated)	39.99	2	1136.6	2.24201
YADTIYnISmK	High	228008367	N7(Deamidated); M10(Oxidation)	39.99	2	1335.62	3.62796
VLKDAVnnITAK	High	161086902	N7(Deamidated); N8(Deamidated)	39.84	2	1287.72	1.97394
DDLDPERnESEPGSQR	High	161086902	N8(Deamidated)	39.8	3	1844.79	1.78905
LnVTSPDLFR	High	124487155	N2(Deamidated)	39.59	2	1162.61	2.38033
EQLQGInASSAAWAR	High	124487155	N7(Deamidated)	39.44	2	1603.77	-3.56963
LTcEcEHnTTGPDcGK	High	254039711	C3(Carbamidomethyl); C5(Carbamidomethyl); N8(Deamidated); C14(Carbamidomethyl)	39.43	2	1879.73	3.20029
AREPSnATQLDGPAR	High	6753150	N6(Deamidated)	39.36	3	1583.78	1.27778
DALQnmSSSLK	High	254675312	N5(Deamidated); M6(Oxidation)	39.28	2	1210.56	2.4259
DITNLInNTFIR	High	34610211	N7(Deamidated)	39.1	2	1434.76	2.25347
NPcnSSVLQDGR	High	150378487	C3(Carbamidomethyl); N4(Deamidated)	38.9	2	1347.6	2.03847
AIIAnLTcK	High	168480136	N5(Deamidated); C8(Carbamidomethyl)	38.72	2	1004.55	1.70217
YEQLQnETR	High	29150253	N6(Deamidated)	38.72	2	1181.55	2.10459
SDFSQTmLFQAnTTR	High	153791843	M7(Oxidation); N12(Deamidated)	38.57	2	1764.8	11.6928
TPAGDLAFNQcPLnATGTTSR	High	169790905	C11(Carbamidomethyl); N14(Deamidated)	38.23	2	2193.03	1.57964
IDVnSWIEnFTK	High	161086902	N4(Deamidated); N9(Deamidated)	38.12	2	1467.7	3.06343
GScVnNSEEKDVPK	High	34328113	C3(Carbamidomethyl); N5(Deamidated)	38.1	2	1563.7	2.65609
SmVDFmNTDnFTSHR	High	84370353	M2(Oxidation); M6(Oxidation); N10(Deamidated)	38.04	3	1834.74	2.95985
DLDmFInASK	High	87299635	M4(Oxidation); N7(Deamidated)	37.97	2	1170.54	3.28013
ncSEPYcPLGcSSR	High	226958549	N1(Deamidated); C2(Carbamidomethyl); C7(Carbamidomethyl); C11(Carbamidomethyl)	37.92	2	1687.66	3.09081
SSPDTQDLYcLnESSK	High	6679150	C10(Carbamidomethyl); N12(Deamidated)	37.83	2	1845.8	18.1432
IKLDnYSTQELGR	High	6754900	N5(Deamidated)	37.79	2	1537.79	2.44442
LEQNFFncScDIR	High	33413429	N7(Deamidated); C8(Carbamidomethyl); C10(Carbamidomethyl)	37.79	2	1704.72	14.1577
mVnHSLHPTEPVK	High	86990446	M1(Oxidation); N3(Deamidated)	37.74	3	1505.75	2.58166
nHSLAFVGTK	High	171543899	N1(Deamidated)	37.67	2	1074.56	3.43744
AQnVSILTLcDATTGVcTK	High	312032384	N3(Deamidated); C10(Carbamidomethyl); C17(Carbamidomethyl)	37.62	2	2054.01	14.003
VAWLnR	High	51092272;30425330	N5(Deamidated)	37.62	2	759.416	1.37318
GKPAnITDSLSnR	High	163659879	N5(Deamidated); N12(Deamidated)	37.39	2	1374.68	-1.45906
YLInVTFEGR	High	117168299	N4(Deamidated)	37.39	2	1212.63	4.88709
FGnLTDLnLTK	High	62990174	N3(Deamidated); N8(Deamidated)	37.19	2	1237.64	3.97583
nVScLWcNENK	High	22122339	N1(Deamidated); C4(Carbamidomethyl); C7(Carbamidomethyl)	37.09	2	1424.6	2.53133
IDnLTGELSTSER	High	170295851	N3(Deamidated)	37.09	2	1435.69	1.82204
LLnQTLR	High	13385294	N3(Deamidated)	37.07	2	858.505	1.07084
nSTTTDQnFTSAK	High	6754382	N1(Deamidated); N8(Deamidated)	36.97	2	1416.61	1.40917
VKDLmVInR	High	326937503	M5(Oxidation); N8(Deamidated)	36.86	2	1104.61	1.8602
SPGAQDnVSVSQGmR	High	148540116	N7(Deamidated); M14(Oxidation)	36.8	2	1549.7	3.5559
AnHSGAVVLLK	High	31982236	N2(Deamidated)	36.77	2	1109.63	2.20736
ALVnFTR	High	183979966	N4(Deamidated)	36.77	2	821.454	2.41346
VGVDAnITR	High	7657413	N6(Deamidated)	36.72	2	945.502	1.94749
SInLTLDR	High	165377150	N3(Deamidated)	36.52	2	932.506	1.60416
ISVLnDGTLnFSR	High	124339785	N5(Deamidated); N10(Deamidated)	36.5	2	1437.74	15.1339
GVFITnETGQPLIGK	High	226693369	N6(Deamidated)	36.45	2	1574.85	2.89945
TnYTLHVIEmK	High	356991208	N2(Deamidated); M10(Oxidation)	36.36	2	1365.67	1.60914
nTTDVVNTmcGYK	High	110347498	N1(Deamidated); M9(Oxidation); C10(Carbamidomethyl)	36.34	2	1519.64	1.07859
NAIQAFGnGTDVNmSPK	High	84662783	N8(Deamidated); M14(Oxidation)	36.27	2	1780.82	2.01818
HEnnTKDnSIQHEFSLTR	High	6678347	N3(Deamidated); N4(Deamidated); N8(Deamidated)	36.17	2	2173.01	14.0422
nGQGSNLDGGNYHVYEnGSLEIK	High	237858632;35215309	N1(Deamidated); N17(Deamidated)	36.05	2	2468.12	12.8047
SSSHLPPSSYFnASGR	High	6753448	N12(Deamidated)	35.97	2	1694.78	2.50075
YAVYWnSSNPR	High	6753724	N6(Deamidated)	35.97	2	1357.62	4.81542
RAnQTALcGGGVQTR	High	259013354	N3(Deamidated); C8(Carbamidomethyl)	35.91	3	1589.78	1.61491
IFPSGnVTNILEmR	High	124248484	N6(Deamidated); M13(Oxidation)	35.9	2	1607.82	4.86514
YQLGTSPYVYQLTTRPVTDGQPHSVnITR	High	116063560	N26(Deamidated)	35.87	3	3293.67	7.9649
ELAAAAnESAVK	High	117168301	N7(Deamidated)	35.84	2	1174.6	1.61258
ILDQAcGTDnQTYASScHLFATK	High	227330561	C6(Carbamidomethyl); N10(Deamidated); C17(Carbamidomethyl)	35.79	3	2602.16	2.70741
QnVSLSILK	High	294997259	N2(Deamidated)	35.69	2	1002.59	1.97613
VQnmSQSIEVLNLR	High	23618873	N3(Deamidated); M4(Oxidation)	35.59	2	1648.85	15.2232
nYSIFLADINQER	High	121674797	N1(Deamidated)	35.41	2	1583.78	4.54734
nVTVVLR	High	113195678	N1(Deamidated)	35.37	2	801.484	1.95429
IIncTDPGHQENSVR	High	377837159	N3(Deamidated); C4(Carbamidomethyl)	35.33	2	1740.8	2.24587
GTVLcGPPPAVEnASLVGVR	High	40789268	C5(Carbamidomethyl); N13(Deamidated)	35.28	2	1994.04	0.119404
DnTTcYEFKK	High	124494256	N2(Deamidated); C5(Carbamidomethyl)	35.2	2	1306.57	2.63744
ESHnTSKGPEATWNLNK	High	82546885	N4(Deamidated)	35.19	2	1913.9	2.16019
GcmESInYnGVnITDLAR	High	165377150	C2(Carbamidomethyl); M3(Oxidation); N7(Deamidated); N9(Deamidated); N12(Deamidated)	35	2	2045.91	15.4229
APPGALnLGLSSnnSTLSVAGAmGSHGGEYEcAATnAHGR	High	159110562	N7(Deamidated); N13(Deamidated); N14(Deamidated); M23(Oxidation); C32(Carbamidomethyl); N36(Deamidated)	34.92	4	3916.8	17.8196
LVAnESVPFETScR	High	31981299	N4(Deamidated); C13(Carbamidomethyl)	34.91	2	1609.76	3.7231
VnSSQALPVDGGEVK	High	226958327	N2(Deamidated)	34.77	2	1500.76	1.0365
GmPNnFSEmPR	High	226874869	M2(Oxidation); N5(Deamidated); M9(Oxidation)	34.62	2	1312.53	1.94042
TYcANEPLSncSQVnR	High	8393787	C3(Carbamidomethyl); N10(Deamidated); C11(Carbamidomethyl); N15(Deamidated)	34.56	2	1914.8	2.67263
nYTWVPIR	High	291290989	N1(Deamidated)	34.44	2	1049.54	1.80579
VQEEQnVTSELIAK	High	117168301	N6(Deamidated)	34.4	2	1588.81	3.55869
TcPAGImGEnNTLVWK	High	6681283	C2(Carbamidomethyl); M7(Oxidation); N10(Deamidated)	34.35	2	1807.84	2.73992
nGGnATLQVDNWPVNEHYPTGNTDNER	High	355390246	N1(Deamidated); N4(Deamidated)	34.32	3	3015.31	3.81307
SVDFNRGTDnITVR	High	30425330	N10(Deamidated)	33.78	2	1594.78	1.44349
SPAnGSLGPmLnLSSGESR	High	110225379	N4(Deamidated); M10(Oxidation); N12(Deamidated)	33.77	2	1891.87	2.0587
EYEGAVYPDnTTDFQR	High	110347564	N10(Deamidated)	33.76	2	1905.82	3.83311
YQTLncSVNVR	High	31982236	N5(Deamidated); C6(Carbamidomethyl)	33.69	2	1354.64	1.44481
GHnATFFGNVnDSAVVR	High	116063560	N3(Deamidated); N11(Deamidated)	33.64	3	1806.85	3.73685
FLYnFTR	High	228008367	N4(Deamidated)	33.49	2	961.48	1.85498
VGGPAPSPSVLnVTGVTQR	High	68989243	N12(Deamidated)	33.34	2	1836.99	3.65243
VSHnASVDmcDLKK	High	312032400	N4(Deamidated); M9(Oxidation); C10(Carbamidomethyl)	33.32	2	1620.74	4.48635
SLDnDNYVFTAPYFnK	High	161086902	N4(Deamidated); N15(Deamidated)	33.3	2	1909.88	17.2274
nLTIVDSGLK	High	6679150	N1(Deamidated)	33.19	1	1060.59	5.39414
IISEnKTDEEPGYIKK	High	117168299	N5(Deamidated)	33.07	2	1864.96	2.01715
VLKDAVNnITAK	High	161086902	N8(Deamidated)	32.85	2	1286.74	2.92973
SLDnDnYVFTAPYFnK	High	161086902	N4(Deamidated); N6(Deamidated); N15(Deamidated)	32.72	2	1910.85	11.3377
TTLVDNNTWnNSHIALVGK	High	61651673	N10(Deamidated)	32.58	2	2098.06	0.00323305
FLEPYnDSIQAQK	High	7242138	N6(Deamidated)	32.57	3	1554.76	16.3242
YSGnYTIDPDGSGPLKPFVVYcDIR	High	116063560	N4(Deamidated); C22(Carbamidomethyl)	32.47	3	2834.34	2.23651
VNRFnSTEYQVVTR	High	124494256	N5(Deamidated)	32.47	2	1713.86	1.84547
ncTGPVSPHQIK	High	29244160	N1(Deamidated); C2(Carbamidomethyl)	32.39	2	1338.65	1.57339
GGSLWLncSTncPRPER	High	159110562	N7(Deamidated); C8(Carbamidomethyl); N11(Deamidated); C12(Carbamidomethyl)	32.35	3	2005.91	13.9822
VLnSTAISLQWNR	High	237858632	N3(Deamidated)	32.29	2	1502.8	0.950042
KNNmEITWTPmnATSAFGPNLR	High	237858632;35215309	M4(Oxidation); M11(Oxidation); N12(Deamidated)	32.24	3	2526.18	2.57287
IGSYnGTAGDSLSYHQGRPFSTEDR	High	226958549	N5(Deamidated)	32.22	3	2717.23	8.76372
FANEYPnITR	High	150378501	N7(Deamidated)	32.16	2	1225.59	2.94488
nVTLQDYGR	High	29244530	N1(Deamidated)	32.15	2	1066.52	0.121696
STEGQSSLTVTnVTEEHYGnYTcVAAnK	High	30425330	N12(Deamidated); N20(Deamidated); C23(Carbamidomethyl); N27(Deamidated)	32.13	3	3064.38	18.8264
InFTAPFNPnK	High	32469489	N2(Deamidated); N10(Deamidated)	31.97	2	1264.62	2.42417
RAnASTFAVPSPVSNSADTR	High	31982223	N3(Deamidated)	31.89	2	2049.01	4.35587
YLYLASnHSNK	High	6753066	N7(Deamidated)	31.54	2	1310.64	1.8181
NQKDEInETDLK	High	238637279	N7(Deamidated)	31.52	2	1447.69	1.55397
VLGFKPKPPKnESLETYPLmmK	High	6753138	N11(Deamidated); M20(Oxidation); M21(Oxidation)	31.49	3	2580.35	2.97369
VInFYAGAnQSmnVTcVGKR	High	7242138	N3(Deamidated); N9(Deamidated); M12(Oxidation); N13(Deamidated); C16(Carbamidomethyl)	31.4	3	2248.06	12.0045
VINFYAGANQSmnVTcVGKR	High	7242138	M12(Oxidation); N13(Deamidated); C16(Carbamidomethyl)	31.33	3	2247.06	2.07171
KnGTFLTLR	High	170172540	N2(Deamidated)	31.31	2	1050.6	3.15485
WTGQnVSVIQK	High	153792247	N5(Deamidated)	31.24	2	1260.66	2.74734
LTVnSSNSIK	High	110347545	N4(Deamidated)	30.99	2	1063.57	1.96864
IYnNTLTYGEVR	High	169790937	N3(Deamidated)	30.99	2	1443.72	2.5408
ILYGLEnTTQELK	High	117647249	N7(Deamidated)	30.93	2	1522.81	4.65399
EDNPDKNPEAPLnVSR	High	6755466	N13(Deamidated)	30.86	3	1795.85	1.77345
VQQVGHYPPAnSSLASR	High	88196788	N11(Deamidated)	30.85	2	1811.91	1.72002
nGQGSNLDGGnYHVYEnGSLEIK	High	237858632;35215309	N1(Deamidated); N11(Deamidated); N17(Deamidated)	30.8	3	2469.09	9.82486
TVnSLnVSAISIPEHDEADDISDEnR	High	31791059	N3(Deamidated); N6(Deamidated); N25(Deamidated)	30.8	3	2843.29	7.94167
QLLQTQVASPAIHPPVSYnDTAPR	High	9055172	N19(Deamidated)	30.72	3	2605.36	12.5431
AnATIEVK	High	153945724	N2(Deamidated)	30.69	2	846.458	1.37755
WGHnVTEFQQR	High	7657067	N4(Deamidated)	30.66	2	1402.65	1.26306
RPASnISASIQR	High	148747408	N5(Deamidated)	30.65	3	1300.7	1.52099
IHETAPDEQSIWnVTVLPnSK	High	35215309	N13(Deamidated); N19(Deamidated)	30.59	3	2380.17	3.43152
ATQLFTnQTDIPNmEDVYAVK	High	9938002	N7(Deamidated); M14(Oxidation)	30.57	2	2416.15	10.5327
LnLTTDPK	High	6677905	N2(Deamidated)	30.53	2	902.484	1.12806
GnGTLITFHSAFQccGK	High	341823657	N2(Deamidated); C14(Carbamidomethyl); C15(Carbamidomethyl)	30.51	2	1898.86	4.1192
nQTVTATFGYPFR	High	41282044	N1(Deamidated)	30.46	2	1503.73	13.1443
VSPDHQPQPQYVSYnQSSYTQWNLQPDTK	High	112293279	N15(Deamidated)	30.41	3	3437.59	10.5512
WAnITWK	High	35215309	N3(Deamidated)	30.41	2	919.469	1.79709
GnETIVnLIHSTR	High	22203763	N2(Deamidated); N7(Deamidated)	30.4	3	1455.77	15.8384
LnLDGSnYTLLK	High	124494256	N2(Deamidated); N7(Deamidated)	30.16	2	1352.72	17.4699
TnQSAELIQPVATnGK	High	27370240	N2(Deamidated); N14(Deamidated)	30.09	2	1673.83	2.34225
AEGDVGPPPSTLINQnETFAK	High	27369644	N16(Deamidated)	30.09	2	2186.07	4.93661
LLLPAKnTTHLK	High	6754920	N7(Deamidated)	30.09	3	1349.82	1.93795
LEQNFFncScDIR	High	33413429	N7(Deamidated); C8(Carbamidomethyl); C10(Carbamidomethyl)	29.91	2	1703.72	5.28575
FYHITVSSSQPnSSnDNIQSITSGDWDVTK	High	312032384	N12(Deamidated); N15(Deamidated)	29.89	3	3330.53	12.2025
NVNFnGSAGTPVmFNK	High	60460877	N5(Deamidated); M13(Oxidation)	29.85	2	1713.79	2.65086
FLSYnVTR	High	27369505	N5(Deamidated)	29.84	2	1000.51	1.55204
YnGSLGLWR	High	356991139	N2(Deamidated)	29.73	2	1066.53	2.75303
LVQVGIYnGTHVIPNDR	High	294997259	N8(Deamidated)	29.62	3	1896	2.96867
IVnGSHYEYK	High	161086986	N3(Deamidated)	29.53	2	1210.58	2.11991
AAnYTSSLNLPDK	High	49274623	N3(Deamidated)	29.51	2	1394.68	2.63284
QLLQTQVASPAIHPPVSYnDTAPR	High	9055172	N19(Deamidated)	29.37	3	2604.36	5.80119
AVISmLnETmnEAPEETKIVIK	High	7106409	M5(Oxidation); N7(Deamidated); M10(Oxidation); N11(Deamidated)	29.29	3	2494.26	11.0191
NLADQGnQTAAIK	High	58037339	N7(Deamidated)	29.19	2	1344.68	1.28233
LTVPSSQnSSFR	High	183979966	N8(Deamidated)	29.08	2	1323.65	-0.268385
VnYSYTAVQIPTDIYK	High	291290989	N2(Deamidated)	28.96	2	1875.94	2.88463
DPDVTnNSIR	High	7549750	N6(Deamidated)	28.92	2	1131.53	2.09415
YFAncTVR	High	21312084	N4(Deamidated); C5(Carbamidomethyl)	28.91	2	1031.46	1.84709
SVAQnYSSITHLHSIGK	High	189458849	N5(Deamidated)	28.9	3	1842.94	2.3102
nnmEITWTPmnATSAFGPNLR	High	237858632;35215309	N1(Deamidated); N2(Deamidated); M3(Oxidation); M10(Oxidation); N11(Deamidated)	28.86	2	2400.08	12.1166
nSSHLVcSAcFGPcAR	High	19527148	N1(Deamidated); C7(Carbamidomethyl); C10(Carbamidomethyl); C14(Carbamidomethyl)	28.76	3	1823.77	3.53752
AYNSAGTGPSSATVnVTTR	High	157909807	N15(Deamidated)	28.72	2	1854.9	7.2298
AmnSSSFEGVSGHVVFDASGSR	High	131888529	M2(Oxidation); N3(Deamidated)	28.72	3	2244.99	4.31737
FVSQTnGnLYIAnVESSDRGnYScFVSSPSITK	High	227497226	N6(Deamidated); N8(Deamidated); N13(Deamidated); N21(Deamidated); C24(Carbamidomethyl)	28.65	3	3646.7	15.9132
HVTDmnSTIHLLR	High	148747408	M5(Oxidation); N6(Deamidated)	28.51	3	1553.78	1.82675
IGSYnGTAGDSLSYHQGRPFSTEDR	High	226958549	N5(Deamidated)	28.5	3	2716.23	2.63515
SFnATAERGEEmTLTcK	High	6754920	N3(Deamidated); M12(Oxidation); C16(Carbamidomethyl)	28.36	2	1961.87	4.20122
VPYnVGPGFAGnFSTQK	High	228008367	N4(Deamidated); N12(Deamidated)	28.26	2	1784.88	14.6948
LKFnSTIK	High	444741657	N4(Deamidated)	28.2	2	951.552	0.785113
AVISmLnETmnEAPEETKIVIKK	High	7106409	M5(Oxidation); N7(Deamidated); M10(Oxidation); N11(Deamidated)	28.19	3	2622.36	11.7845
SPQSnGTSGVEQIcVDVR	High	295789082	N5(Deamidated); C14(Carbamidomethyl)	28.17	2	1935.9	19.2537
AnYnLPImVTDSGKPPmTnITDLR	High	110625609	N2(Deamidated); N4(Deamidated); M8(Oxidation); M17(Oxidation); N19(Deamidated)	28.1	3	2696.33	19.2728
InYTInImELK	High	85861220	N2(Deamidated); N6(Deamidated); M8(Oxidation)	27.97	2	1369.71	15.5552
RnQSLSLLYK	High	6753094	N2(Deamidated)	27.69	2	1222.68	2.25978
EPSnATQLDGPAR	High	6753150	N4(Deamidated)	27.59	2	1356.64	2.443
LVSFEVPQnTSVK	High	23097346	N9(Deamidated)	27.54	2	1448.77	2.2141
RVnYTmDVFELK	High	164419755	N3(Deamidated); M6(Oxidation)	27.47	2	1531.75	1.0955
WPADKEnDTGIVGQHSScDVR	High	161484610	N7(Deamidated); C18(Carbamidomethyl)	27.34	3	2372.06	2.88768
ANQIVIPHnTTFQTEPTK	High	153791389	N9(Deamidated)	27.25	3	2040.05	2.68762
LnmTLPDALVPTFSISnHSLK	High	113195678	N2(Deamidated); M3(Oxidation); N17(Deamidated)	27.2	3	2316.18	2.4313
AAEDWTEnPEPFnASFYR	High	291290989	N8(Deamidated); N13(Deamidated)	27.12	2	2145.94	15.776
EcLGncSEPDDPTK	High	157057178	C2(Carbamidomethyl); N5(Deamidated); C6(Carbamidomethyl)	27.12	2	1622.63	1.62527
VQnmSQSIEVLDRR	High	84370353	N3(Deamidated); M4(Oxidation)	27.08	3	1691.84	2.43936
GEGnETNnmVITWKPLR	High	112293279	N4(Deamidated); N8(Deamidated); M9(Oxidation)	26.99	3	1976.96	12.107
WSYVAYnESDK	High	254028203	N7(Deamidated)	26.85	2	1362.59	2.61209
SRnSTVEYSLSK	High	110625645	N3(Deamidated)	26.62	2	1371.68	1.60854
AQSPPAInASYGPFSVEK	High	298493223	N8(Deamidated)	26.59	2	1864.92	12.2385
TAnETSAEAYnLLLR	High	153791270	N3(Deamidated); N11(Deamidated)	26.51	2	1667.84	15.7913
WSYnnSETSR	High	61656194	N4(Deamidated); N5(Deamidated)	26.4	2	1245.5	2.07051
InSDPTLLPnITLGcEIR	High	126116570	N2(Deamidated); N10(Deamidated); C15(Carbamidomethyl)	26.34	2	2028.06	12.8959
LSYNVIPLnLTLDNR	High	6679909	N9(Deamidated)	26.29	2	1745.95	3.14486
DnATQEEILHYLEK	High	225735655	N2(Deamidated)	26.27	2	1704.82	16.7369
InTTIGSVAAQDPDAAR	High	110347562	N2(Deamidated)	26.23	2	1700.85	3.70912
VVAVSPAnISR	High	225690610	N8(Deamidated)	26.22	2	1113.63	1.06113
RAnASTFAVPSPVSnSADTR	High	31982223	N3(Deamidated); N15(Deamidated)	26.22	2	2050.01	14.6517
AnDSDQGANAEIDYTFHQAPEVVR	High	34328319	N2(Deamidated)	26.05	3	2649.19	7.61229
GTnESEASSTQFTTEIDAPK	High	226958549	N3(Deamidated)	25.98	2	2114.96	14.9919
mALcTNnISDFTVK	High	110625972	M1(Oxidation); C4(Carbamidomethyl); N7(Deamidated)	25.93	2	1630.75	4.02286
RnESHLIDFR	High	224994186	N2(Deamidated)	25.82	3	1287.65	1.68258
ELNILFLnK	High	225543375	N8(Deamidated)	25.64	2	1104.63	2.9322
DLAVGDDYTnR	High	7305189	N10(Deamidated)	25.55	2	1239.55	2.29602
ILFAPDTnFTR	High	15451840	N8(Deamidated)	25.54	2	1295.67	2.01419
IETILLnGTDRK	High	124494256	N7(Deamidated)	25.45	2	1373.77	1.82091
VTnLSDPVVLTFQHQPQPK	High	312032400	N3(Deamidated)	25.39	3	2149.14	2.95455
ETVPSnTTccAR	High	38016190	N6(Deamidated); C9(Carbamidomethyl); C10(Carbamidomethyl)	25.33	2	1396.59	1.99758
VnLTGTPSQR	High	162417988	N2(Deamidated)	25.26	2	1073.56	1.39619
mYSEGSDIVPQSnETALHYFK	High	46309573	M1(Oxidation); N13(Deamidated)	25.09	3	2433.1	4.65089
mnITSIAPLLEK	High	37620157	M1(Oxidation); N2(Deamidated)	25.09	2	1346.73	2.55886
InVSYTGERPSSnmVIVDVK	High	110347469	N2(Deamidated); N13(Deamidated); M14(Oxidation)	25.03	3	2226.12	11.3429
KNnmEITWTPmnATSAFGPNLR	High	237858632;35215309	N3(Deamidated); M4(Oxidation); M11(Oxidation); N12(Deamidated)	24.99	3	2527.17	4.38038
LnKFLEPYnDSIQAQK	High	7242138	N2(Deamidated); N9(Deamidated)	24.86	3	1909.98	14.2866
LFQncSELYK	High	160333208	N4(Deamidated); C5(Carbamidomethyl)	24.84	2	1302.61	2.57777
TAADATGLQPILNQFTPAnVSR	High	154240716	N19(Deamidated)	24.83	2	2287.19	14.6099
SYNPnDTcPAScAK	High	13384722	N5(Deamidated); C8(Carbamidomethyl); C12(Carbamidomethyl)	24.71	2	1585.63	2.15226
GnQSSQWLYEAmAK	High	6755582	N2(Deamidated); M12(Oxidation)	24.63	2	1629.72	0.717594
VFDLHQnmGSVnVSVGcTPAQLIETSR	High	124487155	N7(Deamidated); M8(Oxidation); N12(Deamidated); C17(Carbamidomethyl)	24.47	3	2978.44	17.5726
LDPPcTnTTAPSNYLNNPYVR	High	84042523	C5(Carbamidomethyl); N7(Deamidated)	24.32	2	2408.14	8.38503
VQnVSQSmEVLELR	High	148747133	N3(Deamidated); M8(Oxidation)	24.22	2	1649.83	16.9091
VnGTDLAPDLLnGSQLILR	High	225703147	N2(Deamidated); N12(Deamidated)	24.18	2	2011.08	3.46631
VIYnLTEK	High	33469043	N4(Deamidated)	24.13	1	980.532	2.35512
AAEQIAGSFVYSIPFSTGTVnK	High	6753236	N21(Deamidated)	23.85	2	2288.15	4.04645
FHVnYTQPLVAVK	High	7242138	N4(Deamidated)	23.73	2	1517.8	1.2532
AEFAVAnDTGFVDIPQQEK	High	6753558	N7(Deamidated)	23.7	2	2080.99	10.2912
FnSSSSSLEEK	High	257196264	N2(Deamidated)	23.65	2	1215.54	1.8471
ncTIESTTFYnTDLYK	High	157909825	N1(Deamidated); C2(Carbamidomethyl); N11(Deamidated)	23.46	2	1971.88	11.7486
LVQVGIYnGTHVIPnDR	High	294997259	N8(Deamidated); N15(Deamidated)	23.43	3	1897.01	15.6078
TAnKTDLISESLASR	High	117168301	N3(Deamidated)	23.25	2	1606.83	3.39832
AVcmLSnTTAIAEAWAR	High	6755901;6678467	C3(Carbamidomethyl); M4(Oxidation); N7(Deamidated)	23.14	2	1881.91	12.2724
FnFTNcASLK	High	9055376	N2(Deamidated); C6(Carbamidomethyl)	23	2	1202.55	1.2112
DHGSPTLSAnVSmR	High	18087737	N10(Deamidated); M13(Oxidation)	22.93	2	1488.68	3.14954
VnYTEVSR	High	168693635	N2(Deamidated)	22.91	2	968.469	1.06421
IVASDSGKPSLnQTALVR	High	422744224	N12(Deamidated)	22.87	3	1858.01	12.1926
VmHGGAnITGFQIVnnENPmVQQFIQR	High	163792196	M2(Oxidation); N7(Deamidated); N15(Deamidated); N16(Deamidated); M20(Oxidation)	22.71	3	3078.49	19.934
DYGGNcLIYDADnK	High	31560497	C6(Carbamidomethyl); N13(Deamidated)	22.6	2	1618.67	3.14366
ATQLFTnqTDIPNmEDVYAVK	High	9938002	N7(Deamidated); M14(Oxidation)	22.56	2	2417.14	15.626
VGGPAPSPSVLnVTGVTQR	High	68989243	N12(Deamidated)	22.56	2	1837.93	-17.5404
SQTnLTDcPFHDQPHLmR	High	31981822	N4(Deamidated); C8(Carbamidomethyl); M17(Oxidation)	22.32	3	2213.98	3.37449
FVPNSnmnFTGQAYSGR	High	85719313	N6(Deamidated); M7(Oxidation); N8(Deamidated)	22.26	2	1907.85	14.7136
GAAHSAEPGRDTIPGDPSSnATSR	High	6681281	N20(Deamidated)	22.24	3	2352.09	2.83852
TTLVDnNTWnNSHIALVGK	High	61651673	N6(Deamidated); N10(Deamidated)	22.23	2	2099.05	5.52452
TDDEVVQREEEAIQLDGLnASQIR	High	6755863	N19(Deamidated)	22.08	3	2729.33	4.46763
AnDTREEAGLPAAGEDETSWTER	High	261878591	N2(Deamidated)	22.06	3	2506.11	3.80509
nGTVAVVEPEcEK	High	26986569	N1(Deamidated); C11(Carbamidomethyl)	22.01	2	1432.66	1.28637
LVQVGIYnGTHVIPNDRK	High	294997259	N8(Deamidated)	21.91	3	2024.1	3.29377
SmVDFmnTDnFTSHR	High	84370353	M2(Oxidation); M6(Oxidation); N7(Deamidated); N10(Deamidated)	21.81	3	1835.75	13.5272
SYIFIYDGNKnSTTTDQnFTSAK	High	6754382	N11(Deamidated); N18(Deamidated)	21.79	3	2617.21	4.36963
GNPAAYGITVTNHPmnK	High	110225379	M15(Oxidation); N16(Deamidated)	21.79	2	1801.85	-3.87544
DIYTmmGQnVTLEcFALGnPVPDIR	High	227497226	M5(Oxidation); M6(Oxidation); N9(Deamidated); C14(Carbamidomethyl); N19(Deamidated)	21.65	3	2888.36	13.9829
FGTVPnGSTER	High	117168299	N6(Deamidated)	21.55	2	1165.55	0.995964
YVPFnGTK	High	237858632;35215309	N5(Deamidated)	21.41	1	926.466	4.1674
AQSPPAInASYGPFSVEK	High	298493223	N8(Deamidated)	21.37	2	1863.92	6.55115
NPNnnTIHPNLR	High	225637487	N4(Deamidated); N5(Deamidated)	21.22	2	1405.71	17.7287
LLFPTnSSSR	High	112293279	N6(Deamidated)	21.19	2	1122.58	1.97496
ESGAnVTGFQLVnYTDTIPAR	High	356991208	N5(Deamidated); N13(Deamidated)	21.16	2	2256.09	9.50453
FKDNTPNAnATER	High	166064046	N9(Deamidated)	21.11	2	1478.69	1.80401
KnASSVVPSSVHNSAnQR	High	281182810	N2(Deamidated); N16(Deamidated)	20.8	3	1883.92	1.47125
AEGDVGPPPSTLINQnETFAK	High	27369644	N16(Deamidated)	20.7	2	2187.07	12.3544
NILPTmnGScTFHK	High	84781762	M6(Oxidation); N7(Deamidated); C10(Carbamidomethyl)	20.68	2	1636.75	2.78449
ELLSnQSEVmLR	High	58037273	N5(Deamidated); M10(Oxidation)	20.66	2	1436.72	19.4324
RGPEcSQnYTAPTGVIK	High	244792700	C5(Carbamidomethyl); N8(Deamidated)	20.57	2	1878.91	3.32701
TGTSmTSVNWLTPnGTLmTHGSYR	High	38016190	M5(Oxidation); N14(Deamidated); M18(Oxidation)	20.52	3	2645.21	6.0644
LSYSGIPLnLTLDNR	High	6679907	N9(Deamidated)	20.5	2	1676.89	4.79632
SLWnmSAAnnNIK	High	226874869	N4(Deamidated); M5(Oxidation); N9(Deamidated); N10(Deamidated)	20.47	2	1481.68	18.0481
DnTTcYEFK	High	124494256	N2(Deamidated); C5(Carbamidomethyl)	20.43	2	1178.47	2.4056
nQSVPLSccR	High	254281189	N1(Deamidated); C8(Carbamidomethyl); C9(Carbamidomethyl)	20.32	2	1221.54	2.77064
HAPDIPDDSTDnITIFTR	High	247269171	N12(Deamidated)	19.84	2	2028.96	2.94707
nLSSVGSLmnGPSFTSK	High	110625972	N1(Deamidated); M9(Oxidation); N10(Deamidated)	19.69	2	1743.81	2.14493
FEnQTcFPLPDSR	High	197333685	N3(Deamidated); C6(Carbamidomethyl)	19.65	2	1612.72	16.1252
GIPDQKVnFTcK	High	294997315	N8(Deamidated); C11(Carbamidomethyl)	19.51	2	1407.7	2.27727
VSPDHQPQPQYVSYnQSSYTQWNLQPDTK	High	112293279	N15(Deamidated)	19.34	3	3438.59	15.7646
YTGnASALLILPDQGR	High	309267120	N4(Deamidated)	19.31	2	1689.89	4.02481
VFVYTPTTnYTLR	High	19527008	N9(Deamidated)	19.29	2	1575.81	3.3946
TGTSmTSVnWLTPnGTLmTHGSYR	High	38016190	M5(Oxidation); N9(Deamidated); N14(Deamidated); M18(Oxidation)	19.22	3	2646.21	11.8026
FYHITVSSSQPnSSnDnIQSITSGDWDVTK	High	312032384	N12(Deamidated); N15(Deamidated); N17(Deamidated)	19.17	3	3331.51	10.9876
YQLGTSPYVYQLTTRPVTDGQPHSVnITR	High	116063560	N26(Deamidated)	19.02	3	3294.68	16.6301
TnSSFIQGFVDHVK	High	225735655	N2(Deamidated)	18.93	2	1579.78	2.41867
LKQnLESnLTNLIK	High		N4(Deamidated); N8(Deamidated)	18.9	3	1630.88	-5.75948
LQAQDSGFYEcYTPSTDTQYLGnYSAK	High	32189434	C11(Carbamidomethyl); N23(Deamidated)	18.83	3	3109.35	8.03118
RGDLNInmTSPmGTK	High	6679229	N7(Deamidated); M8(Oxidation); M12(Oxidation)	18.69	2	1667.78	2.59022
LSYnVIPLnLTLDNR	High	6679909	N4(Deamidated); N9(Deamidated)	18.62	2	1746.92	-1.5428
mYSEGSDIVPQSnETALHYFK	High	46309573	M1(Oxidation); N13(Deamidated)	18.58	3	2434.1	10.9649
VnLSFPSAQSLPASDTHLK	High	110347469	N2(Deamidated)	18.53	3	2013.03	2.40295
AnASTFAVPSPVSNSADTR	High	31982223	N2(Deamidated)	18.53	2	1892.9	2.48219
YNQETPmEIcLnGTPALAYLASAPPPLcPSGR	High	7242181	M7(Oxidation); C10(Carbamidomethyl); N12(Deamidated); C28(Carbamidomethyl)	18.39	3	3505.67	6.29734
GKAnSTGTLVITnPTR	High	227497226	N4(Deamidated); N13(Deamidated)	18.35	2	1631.87	7.67267
NLnFSTR	High	225637535	N3(Deamidated)	18.34	2	852.422	1.11017
VDQNDnTSLQWSNPAQQTLYFDDK	High	225543375	N6(Deamidated)	18.3	3	2828.28	4.64518
TcNPETFPLRnESLQcPTAR	High	312596932	C2(Carbamidomethyl); N11(Deamidated); C16(Carbamidomethyl)	18.22	3	2392.11	3.51258
AnASEGTFPncTGHcTHPR	High	116063560	N2(Deamidated); N10(Deamidated); C11(Carbamidomethyl); C15(Carbamidomethyl)	18.15	3	2115.87	2.92372
DcSLGQSYLnSTGYR	High	23956144	C2(Carbamidomethyl); N10(Deamidated)	18.13	2	1721.75	5.95351
QLLQTQVASPAIHPPVSYnDTAPR	High	9055172	N19(Deamidated)	17.84	3	2606.35	16.1887
VnLSFPSAQSLPASDTHLK	High	110347469	N2(Deamidated)	17.84	3	2014.04	13.3988
LVTQTIPcnK	High	31542362	C8(Carbamidomethyl); N9(Deamidated)	17.79	2	1174.62	2.09019
SNPEPSVAFELPSRnVTVnETER	High	6754614	N15(Deamidated); N19(Deamidated)	17.72	3	2574.24	2.36067
VVncSDPGIPANSK	High	161086986	N3(Deamidated); C4(Carbamidomethyl)	17.69	2	1458.69	0.911864
ITNWmPDSmnFSDVK	High	28565287	M5(Oxidation); M9(Oxidation); N10(Deamidated)	17.66	2	1817.78	3.48375
QGPQAGGTTLTInGTHLDTGSK	High	226958476	N13(Deamidated)	17.62	3	2155.07	2.15195
HVYNnLTEEQK	High	31542035	N5(Deamidated)	17.52	2	1375.65	0.787004
ALVTLEGIPAAVPGQPAELQLnVTK	High	159110562	N22(Deamidated)	17.36	2	2531.44	17.2408
DGGLPSLQSnATVR	High	157426851	N10(Deamidated)	17.31	2	1415.72	1.81406
DLQGNPIAnATISVDGIDHDVTSAK	High	22203763	N9(Deamidated)	16.72	3	2553.26	10.3262
ELnISIcPVSQTSER	High	113195690	N3(Deamidated); C7(Carbamidomethyl)	16.64	2	1733.84	1.44311
EAPSPEGQVTnQSR	High	134053935	N11(Deamidated)	16.14	2	1500.69	0.566187
VVnSTTGPGEHLR	High	47059073	N3(Deamidated)	16.08	2	1367.7	3.14325
NSGLLGALnDTmDK	High	117647249	N9(Deamidated); M12(Oxidation)	15.98	2	1465.67	-10.1437
TFASHnASGGSSAGLR	High	158937286	N6(Deamidated)	15.97	3	1520.71	1.41736
WPADKEnDTGIVGQHSScDVR	High	161484610	N7(Deamidated); C18(Carbamidomethyl)	15.84	3	2373.07	11.5253
ADANPPATEYHWTTLnGSLPK	High	40254534	N16(Deamidated)	15.73	3	2284.09	2.81963
NAIQAFGnGTDVNmSPK	High	84662783	N8(Deamidated); M14(Oxidation)	15.7	2	1781.8	1.32792
TVEInLTnDYYLSGGLSEK	High	124486807	N5(Deamidated); N8(Deamidated)	15.59	2	2118.04	13.23
SnPEPSVAFELPSRnVTVnETER	High	6754614	N2(Deamidated); N15(Deamidated); N19(Deamidated)	15.52	3	2575.25	11.458
IIISPEEnVTLTcTAEnQLER	High	31791059	N8(Deamidated); C13(Carbamidomethyl); N17(Deamidated)	15.5	2	2432.2	6.16815
LGTEAmSTnHSVIVNSPVITAAINK	High	58037543	M6(Oxidation); N9(Deamidated)	15.48	3	2584.34	4.022
YGEnDSLSVEGFR	High	156105683	N4(Deamidated)	15.37	2	1473.66	5.17125
nLTScPDGAPFIQHGPDYR	High	6680744	N1(Deamidated); C5(Carbamidomethyl)	15.37	3	2145.97	1.85067
LDPPcTnTTAPSnYLNNPYVR	High	84042523	C5(Carbamidomethyl); N7(Deamidated); N13(Deamidated)	15.35	2	2409.14	16.3337
LEQmTmnInLTGPLPAPYK	High	117647249	M4(Oxidation); M6(Oxidation); N7(Deamidated); N9(Deamidated)	15.33	2	2165.08	11.9582
AnASTFAVPSPVSnSADTR	High	31982223	N2(Deamidated); N14(Deamidated)	15.25	2	1893.91	12.5319
LHVAQPEnDSHVALLK	High	254028203	N8(Deamidated)	15.22	3	1772.94	12.5691
GGSLWLncSTNcPRPER	High	159110562	N7(Deamidated); C8(Carbamidomethyl); C12(Carbamidomethyl)	15.11	3	2004.91	2.4854
WDPVVPLRnESTVTGYK	High	54607084	N9(Deamidated)	14.86	2	1962.01	5.82516
SILTVTnVTQEHFGnYTcVAANK	High	28893343	N7(Deamidated); N15(Deamidated); C18(Carbamidomethyl)	14.78	3	2570.24	10.99
nSTFGSVEVFSLDPNK	High	31542362	N1(Deamidated)	14.6	2	1741.84	4.16536
SVSVAAGDSTVLncTLTSLLPVGPIR	High	294997315	N13(Deamidated); C14(Carbamidomethyl)	14.39	3	2628.4	2.72882
KPPPSQPPGNIIWnSSDSK	High	157909807	N14(Deamidated)	14.39	3	2050.02	0.176054
nSSYFVEWIPNNVK	High	33859488;31981939;12963615	N1(Deamidated)	14.34	2	1697.85	19.2241
GnGTLITFHSAFQccGK	High	341823657	N2(Deamidated); C14(Carbamidomethyl); C15(Carbamidomethyl)	14.12	3	1899.86	13.6476
SAFDPPNFPIcLLGnR	High	158711686	C11(Carbamidomethyl); N15(Deamidated)	13.89	2	1818.89	3.83955
SPLPAAFTAnGTHLQHLAR	High	225690610	N10(Deamidated)	13.63	3	2003.05	2.73901
ALPGGTDnASAASAAGGSGPQR	High	36054013	N8(Deamidated)	13.6	3	1914.9	11.5577
nGTEVVScHPQGSTAGVVYR	High	9055376	N1(Deamidated); C8(Carbamidomethyl)	13.51	3	2118.99	2.54822
QHTVTTTTKGEnFTETDVK	High	506326231	N12(Deamidated)	13.4	3	2138.03	0.72218
GDLNInmTSPmGTK	High	6679229	N6(Deamidated); M7(Oxidation); M11(Oxidation)	13.39	2	1511.68	4.0185
nLINDYVSnQTQGmIK	High	309267120	N1(Deamidated); N9(Deamidated); M14(Oxidation)	13.39	2	1855.9	14.6821
DLQGNPIAnATISVDGIDHDVTSAK	High	22203763	N9(Deamidated)	13.19	3	2552.25	2.36964
nNTIPDSQmSASSSYK	High	113865977	N1(Deamidated); M9(Oxidation)	12.88	2	1746.75	1.44611
EIFVVnGTQGK	High	49457857	N6(Deamidated)	12.78	2	1192.62	3.28365
KDTcAQEcSHFnLTK	High	45504394	C4(Carbamidomethyl); C8(Carbamidomethyl); N12(Deamidated)	12.7	3	1840.81	13.8598
ImQDPIQQAEGLYcnR	High	213385308	M2(Oxidation); C14(Carbamidomethyl); N15(Deamidated)	12.51	2	1952.88	-0.101168
GcmESINYNGVnITDLAR	High	165377150	C2(Carbamidomethyl); M3(Oxidation); N12(Deamidated)	12.27	2	2043.91	-0.322084
LTIVnSSVLDRPR	High	110625645	N5(Deamidated)	12.26	2	1470.83	1.26187
ITnVSEEDSGEYFcLASnK	High	237858632;35215309	N3(Deamidated); C14(Carbamidomethyl); N18(Deamidated)	12.22	2	2164.95	13.0294
VTnLSDPVVLTFQHQPQPK	High	312032400	N3(Deamidated)	12	3	2150.13	7.63364
LGTEAmSTnHSVIVnSPVITAAINK	High	58037543	M6(Oxidation); N9(Deamidated); N15(Deamidated)	11.72	3	2585.29	-7.81018
LEPnSVDPEnITEILIANQK	High	6679150	N4(Deamidated); N10(Deamidated)	11.64	2	2240.14	11.1576
AAPYWIVAPQnLVLSPGEnGTLIcR	High	225637535	N11(Deamidated); N19(Deamidated); C24(Carbamidomethyl)	11.6	3	2741.43	10.281
YDIFQYQTTnTTNPGYR	High	60460877	N10(Deamidated)	11.48	2	2082.93	-5.92012
VINFYAGANQSmnVTcVGKR	High	7242138	M12(Oxidation); N13(Deamidated); C16(Carbamidomethyl)	11.42	3	2246.08	3.05409
TAADATGLQPILnQFTPAnVSR	High	154240716	N13(Deamidated); N19(Deamidated)	11.38	2	2288.17	14.3338
DLnISEDR	High	124339785	N3(Deamidated)	11.35	1	962.445	2.84194
YYnYTLSInGK	High	29789239	N3(Deamidated); N9(Deamidated)	11.33	2	1337.63	4.22844
VPPnSTSNILNR	High	31981754	N4(Deamidated)	11.3	2	1312.69	2.03607
LRPLFnK	High	14916479	N6(Deamidated)	11.3	2	888.532	2.05138
GSALHEDIYVLHDnGTLEIPVAQK	High	225637535	N14(Deamidated)	11.26	3	2621.34	12.0294
WVEnYTNSLLK	High	6678091	N4(Deamidated)	11.25	2	1367.68	-0.495744
ILIWEDGSLEInnITR	High	227497226	N12(Deamidated); N13(Deamidated)	11.07	2	1888	13.6927
TnVSNAGLPSDFR	High	7949098	N2(Deamidated)	10.92	2	1378.66	2.59699
YNAQPVGnWSDcILPEGK	High	259013354	N8(Deamidated); C12(Carbamidomethyl)	10.73	2	2048.94	2.96847
VAFVLYnnLGPYLSTEnASmK	High	58037543	N7(Deamidated); N8(Deamidated); N17(Deamidated); M20(Oxidation)	10.71	2	2350.11	-1.96526
IWnVTR	High	12963613	N3(Deamidated)	10.68	1	789.427	2.34196
KcLAnGSWTDmDTPSR	High	131888529	C2(Carbamidomethyl); N5(Deamidated); M11(Oxidation)	10.58	3	1855.8	2.53285
VPIQSNETLLGAVInnVSEAmETLTR	High	24233554	N15(Deamidated); N16(Deamidated); M21(Oxidation)	10.48	3	2818.41	2.19464
EVTVLGVATAPTQVLSNGIPVSnFTYSPDNK	High	226693369	N23(Deamidated)	10.41	3	3220.65	6.43051
KPGSFAnVTIDmcAIIDR	High	165377150	N7(Deamidated); M12(Oxidation); C13(Carbamidomethyl)	10.36	3	2024.98	2.76073
EAFSLnSSTGELR	High	242397490	N6(Deamidated)	10.28	2	1411.67	0.996703
DGQELHPLETTVNPSGKnVSYnISSTVR	High	294997315	N18(Deamidated); N22(Deamidated)	10.25	3	3044.49	3.80407
LLAnSSmLGEGQVLR	High	357588422	N4(Deamidated); M7(Oxidation)	10.25	2	1605.84	16.5821
nVTYGTYLDDPDPDDGFnYK	High	41282022	N1(Deamidated); N18(Deamidated)	10.13	2	2310.99	16.0314
NTDGTYnYTSLFLVnSSAHR	High	294997315	N7(Deamidated); N15(Deamidated)	10.11	3	2262.03	-2.29543

## Sheet: Test 3
N-glycopeptides identified from mouse brain after poly-(AA-co-hydrazide) enrichment
N-glycopeptide Sequence	Peptide Confidence	Protein Group Accessions	Modifications	IonScore	Charge	MH+ [Da]	ΔM [ppm]
YTcTAQTIVDnSSASADLVVR	High	227497226	C3(Carbamidomethyl); N11(Deamidated)	138.95	2	2272.08	2.13504
KEnGVFEEISnSSGR	High	153945724	N3(Deamidated); N11(Deamidated)	138.64	2	1654.76	1.97815
VSLTnVSISDEGR	High	71040107	N5(Deamidated)	130.29	2	1377.69	3.39548
ALPGGTDnASAASAAGGSGPQR	High	36054013	N8(Deamidated)	130.09	2	1913.9	2.19873
GKAnSTGTLVITNPTR	High	227497226	N4(Deamidated)	128.59	2	1630.88	0.421376
ITnVSEEDSGEYFcLASNK	High	237858632;35215309	N3(Deamidated); C14(Carbamidomethyl)	125.9	2	2163.95	4.29509
GSQGQFPLTQnVTVVEGGTAILTcR	High	225543375	N11(Deamidated); C24(Carbamidomethyl)	125.58	2	2634.34	9.20235
TSDTGEEEAITnSTEAnGK	High	116014342	N12(Deamidated); N17(Deamidated)	122.18	2	1955.83	3.51186
GcmESINYnGVnITDLAR	High	165377150	C2(Carbamidomethyl); M3(Oxidation); N9(Deamidated); N12(Deamidated)	121.88	2	2044.91	6.53944
LDWLGncSGLNDDSYGYR	High	6753138	N6(Deamidated); C7(Carbamidomethyl)	121.51	2	2105.9	4.76707
TSDTGEEEAITnSTEANGK	High	116014342	N12(Deamidated)	121.49	2	1954.84	2.64309
LNTESnASTLLLDnSTFVTFK	High	238776842	N6(Deamidated); N14(Deamidated)	118.35	2	2317.16	4.91989
TVEInLTNDYYLSGGLSEK	High	124486807	N5(Deamidated)	117.99	2	2117.03	1.41918
NSmTPGNLSPGIYLcnATNR	High	159110562	M3(Oxidation); C15(Carbamidomethyl); N16(Deamidated)	117.37	2	2197.01	4.97873
IGPGEPLELLcnVSGALPPPGR	High	32189434	C11(Carbamidomethyl); N12(Deamidated)	117.1	2	2244.18	3.18601
TDcDSSTASLcSFPVAnVSLAK	High	236465189	C3(Carbamidomethyl); C11(Carbamidomethyl); N17(Deamidated)	116.79	2	2331.06	6.55268
ESGAnVTGFQLVnYTDTIPAR	High	356991208	N5(Deamidated); N13(Deamidated)	116.04	2	2255.1	7.9421
LEnLSSTESGYTATLTR	High	226693369	N3(Deamidated)	115.86	2	1843.9	3.62923
GTnESEASSTQFTTEIDAPK	High	226958549	N3(Deamidated)	114.92	2	2113.95	3.62669
VINFYAGAnQSmnVTcVGK	High	7242138	N9(Deamidated); M12(Oxidation); N13(Deamidated); C16(Carbamidomethyl)	114.74	2	2090.96	4.76503
LEDFNYNnQTITDQIYR	High	131888529	N8(Deamidated)	114.47	2	2148	4.33183
SPQSnGTSGVEQIcVDVR	High	295789082	N5(Deamidated); C14(Carbamidomethyl)	113.15	2	1933.9	4.3844
FKLDWLGncSGLNDDSYGYR	High	6753138	N8(Deamidated); C9(Carbamidomethyl)	110.56	2	2381.06	4.29354
LLAnSSmLGEGQVLR	High	357588422	N4(Deamidated); M7(Oxidation)	109.28	2	1604.84	2.44908
HLYTTTGGETDFTnVTSLR	High	34610211	N14(Deamidated)	109.22	2	2114.01	4.26942
VTQQSPTSmNQVnLTcR	High	294997315	M9(Oxidation); N13(Deamidated); C16(Carbamidomethyl)	109.03	2	1980.91	0.43048
IDSTGnVTNELR	High	87299635	N6(Deamidated)	108.35	2	1319.65	2.1572
GSQGQFPLTQnVTVVEGGTAILTcR	High	225543375	N11(Deamidated); C24(Carbamidomethyl)	107.63	2	2635.34	13.0408
QTVEEEGGASSYnTSSK	High	226958549	N13(Deamidated)	106.13	2	1774.76	1.70986
VGVNKnQTVTATFGYPFR	High	41282044	N6(Deamidated)	103.96	2	2000.03	2.89458
GVLmVGnETTYEDGHGAR	High	312596932	M4(Oxidation); N7(Deamidated)	103.83	2	1922.86	3.20319
LmNAPLYLAEWQnITK	High	238637279	M2(Oxidation); N13(Deamidated)	103.66	2	1921.97	0.98167
TILVDNNTWnNTHISR	High	148747128	N10(Deamidated)	102.55	2	1898.94	3.80176
TVVAPSTEGGLnLTSTFLR	High	119226208	N12(Deamidated)	102.43	2	1964.04	3.74425
DAmVGnYTcEVTELSR	High	6754382	M3(Oxidation); N6(Deamidated); C9(Carbamidomethyl)	101.66	2	1861.8	2.11036
VINFYAGANQSmnVTcVGK	High	7242138	M12(Oxidation); N13(Deamidated); C16(Carbamidomethyl)	101.51	2	2089.98	4.01143
IQFGGAnVSGFQIVDYDDSLVSK	High	85861220	N7(Deamidated)	101.46	2	2460.21	5.41789
IYAGmVSLmDEAVGnVTK	High	125656171	M5(Oxidation); M9(Oxidation); N15(Deamidated)	100.05	2	1930.92	5.18216
THnLTNLNPDLQYR	High	112293279	N3(Deamidated)	99.93	2	1699.85	3.03028
DEGDYFcELQVSGANPmSSnK	High	6678347	C7(Carbamidomethyl); M17(Oxidation); N20(Deamidated)	99.67	2	2364.97	3.17227
IVSPEPGGAAGPnLTcR	High	357588422	N13(Deamidated); C16(Carbamidomethyl)	99.27	2	1696.84	3.26898
IYDISNDmTINEGTnVTLTcLATGKPEPVISWR	High	28893343	M8(Oxidation); N15(Deamidated); C20(Carbamidomethyl)	98.89	3	3725.83	5.94677
LFnGQQGIIIQnFSTR	High	28893343	N3(Deamidated); N12(Deamidated)	98.75	2	1837.95	2.46842
FVPFSDQQISnDSSSSEnR	High	163792196	N11(Deamidated); N18(Deamidated)	98.52	2	2145.94	6.78354
IDVNSWIEnFTK	High	161086902	N9(Deamidated)	98.49	2	1466.72	1.15619
TAnETSAEAYNLLLR	High	153791270	N3(Deamidated)	98.28	2	1666.83	2.47641
TQLTcSLnSSGVDIVGHR	High	116014342	C5(Carbamidomethyl); N8(Deamidated)	97.98	2	1944.95	3.42225
VAFVLYNNLGPYLSTEnASmK	High	58037543	N17(Deamidated); M20(Oxidation)	97.9	2	2348.16	5.62913
LDPVSLQILQTWnTSYPK	High	84370353	N13(Deamidated)	97.4	2	2104.11	6.06766
DPAGWLSINPInGTVDTTAVLDR	High	110625609	N12(Deamidated)	96.91	2	2426.23	3.26165
FAnYSImNLQNR	High	294997259	N3(Deamidated); M7(Oxidation)	96.65	2	1487.7	1.53041
GTAGNALmDGASQLVGEnR	High	33859809	M8(Oxidation); N18(Deamidated)	96.53	2	1877.87	4.1603
FLEPYnDSIQAQK	High	7242138	N6(Deamidated)	96.37	2	1553.75	1.46007
VDQNDnTSLQWSNPAQQTLYFDDKK	High	225543375	N6(Deamidated)	95.74	3	2956.37	2.99898
DVGSGTTnNSQAcAQFLEQYFHNSDLTEFmR	High	6753448	N8(Deamidated); C13(Carbamidomethyl); M30(Oxidation)	95.72	3	3585.54	7.45886
DGQLLPSSnYSNIK	High	124517683	N9(Deamidated)	95.71	2	1536.76	1.11117
FLnVTPNVEVNVEcR	High	7242138	N3(Deamidated); C14(Carbamidomethyl)	94.52	2	1790.88	2.63142
GHnATFFGNVnDSAVVR	High	116063560	N3(Deamidated); N11(Deamidated)	94.49	2	1806.85	3.71052
SDVPNTSPnSTSQHVAEFETER	High	124486807	N9(Deamidated)	94.43	2	2433.09	5.80684
ILIWEDGSLEINnITR	High	227497226	N13(Deamidated)	94.42	2	1886.99	2.25364
mTQESALIFPFLnK	High	16716503	M1(Oxidation); N13(Deamidated)	94.03	2	1655.84	2.58401
KVIcTGPnDTSPGSPR	High	294997259	C4(Carbamidomethyl); N8(Deamidated)	94.01	2	1686.82	3.43197
NPEAGVATTDLYGncTLR	High	6679229	N14(Deamidated); C15(Carbamidomethyl)	93.95	2	1952.91	1.99601
AGPnGTLFVVDAYK	High	21313668	N4(Deamidated)	93.84	2	1452.74	3.52831
AGFEYAFDQLQNSnITR	High	291290989	N14(Deamidated)	93.45	2	1974.93	4.86767
LTScATnASmcGDEAR	High	124494256	C4(Carbamidomethyl); N7(Deamidated); M10(Oxidation); C11(Carbamidomethyl)	93.29	2	1760.69	2.50946
AFInGTGLETVISR	High	153792247	N4(Deamidated)	93.25	2	1478.79	3.02207
DLQGNPIAnATISVDGIDHDVTSAK	High	22203763	N9(Deamidated)	93.15	2	2552.27	8.71212
SGGnATLQVDSWPVIER	High	226958327	N4(Deamidated)	92.87	2	1829.91	3.85396
TPAGDLAFNQcPLnATGTTSR	High	169790905	C11(Carbamidomethyl); N14(Deamidated)	92.44	2	2193.03	2.47024
nSmTPGNLSPGIYLcnATNR	High	159110562	N1(Deamidated); M3(Oxidation); C15(Carbamidomethyl); N16(Deamidated)	92.29	2	2198	8.13881
IYDISnDmTInEGTnVTLTcLATGKPEPVISWR	High	28893343	N6(Deamidated); M8(Oxidation); N11(Deamidated); N15(Deamidated); C20(Carbamidomethyl)	91.42	3	3727.81	11.3428
VLVAPPSEEAnTTK	High	7106409	N11(Deamidated)	90.65	2	1456.75	-0.292585
IDnLTGELSTSER	High	170295851	N3(Deamidated)	90.15	2	1435.69	-0.133547
TnTSALLYDSLR	High	359807089	N2(Deamidated)	89.64	2	1354.69	3.10567
FYPEDLQLIWLEnGnVSR	High	294997315	N13(Deamidated); N15(Deamidated)	89.58	2	2195.08	5.72157
TAADATGLQPILNQFTPAnVSR	High	154240716	N19(Deamidated)	89.53	2	2286.19	7.09084
VIEEFYnQTWNHR	High	165377226	N7(Deamidated)	89.02	2	1736.81	5.42608
KKENGVFEEISnSSGR	High	153945724	N12(Deamidated)	88.77	2	1781.87	1.77297
WYSAGLASnSSWFR	High	119226208	N9(Deamidated)	88.35	2	1632.75	3.29017
VDGQLVnLTLVEFR	High	116063560	N7(Deamidated)	88.03	2	1603.87	2.58078
QSnGSIAVISSLAGK	High	113680741	N3(Deamidated)	87.98	2	1432.77	0.980829
GnYScFVSSPSITK	High	227497226	N2(Deamidated); C5(Carbamidomethyl)	87.82	2	1547.71	2.33781
LTGALAGGGSAAGTSAnATK	High	223633888	N17(Deamidated)	87.78	2	1676.85	2.51869
HEnNTKDNSIQHEFSLTR	High	6678347	N3(Deamidated)	87.59	2	2171.02	5.51521
ATQLFTnQTDIPNmEDVYAVK	High	9938002	N7(Deamidated); M14(Oxidation)	86.93	2	2415.15	3.31229
AVnQTGALYQcDYSTSR	High	132626295	N3(Deamidated); C11(Carbamidomethyl)	86.6	2	1934.86	3.33069
SYIFIYDGNKnSTTTDQnFTSAK	High	6754382	N11(Deamidated); N18(Deamidated)	86.45	2	2617.2	2.62572
AEFAVAnDTGFVDIPQQEK	High	6753558	N7(Deamidated)	86.01	2	2079.99	3.1984
LTWSNAnGTASYR	High	208609941	N7(Deamidated)	85.74	2	1441.67	2.89593
GLmVGnGSVLGVVQAVDAETGK	High	172073152	M3(Oxidation); N6(Deamidated)	85.55	2	2118.08	1.91812
VELVAmnETDPK	High	117168299	M6(Oxidation); N7(Deamidated)	85.31	2	1362.65	3.04381
KNNmEITWTPmnATSAFGPNLR	High	237858632;35215309	M4(Oxidation); M11(Oxidation); N12(Deamidated)	84.42	2	2526.2	8.32847
NTNDNIQEcFnTTK	High	156105683	C9(Carbamidomethyl); N11(Deamidated)	84.38	2	1699.73	1.55917
AYNSAGTGPSSATVnVTTR	High	157909807	N15(Deamidated)	84.33	2	1854.89	4.4658
DVGSGTTnNSQAcAQFLEQYFHNSDLTEFmR	High	6753448	N8(Deamidated); C13(Carbamidomethyl); M30(Oxidation)	84.32	3	3584.56	6.84994
TmVFPVmYLnESVLIDK	High	6680878	M2(Oxidation); M7(Oxidation); N10(Deamidated)	84.13	2	2032.01	4.23043
GSQGFLnGSEVSDLLR	High	257467657	N7(Deamidated)	84.08	2	1679.83	3.96498
ANIQFGEnGTTISAVTNK	High	6680878	N8(Deamidated)	84.04	2	1865.93	3.97484
SLEVLnLSSNK	High	226874869	N6(Deamidated)	84	2	1204.65	2.84402
LAWEGnETVTTR	High	158711686	N6(Deamidated)	83.89	2	1377.67	1.36618
LnTESnASTLLLDnSTFVTFK	High	238776842	N2(Deamidated); N6(Deamidated); N14(Deamidated)	83.2	2	2318.16	14.2352
YPGIFnSTTSDAFLQSK	High	31543926	N6(Deamidated)	82.91	2	1876.9	2.08794
AAEDWTENPEPFnASFYR	High	291290989	N13(Deamidated)	82.72	2	2144.93	4.91675
YnGSLTTPNcDETVIWTVYK	High	6671678	N2(Deamidated); C10(Carbamidomethyl)	81.98	2	2362.1	4.77417
DATIQAYLSSGnFSK	High	113195678	N12(Deamidated)	81.93	2	1602.77	3.15305
YTcTAQTIVDnSSASADLVVR	High	227497226	C3(Carbamidomethyl); N11(Deamidated)	81.83	2	2273.09	13.1399
FIDSEFQncSFLHnK	High	226443034	N8(Deamidated); C9(Carbamidomethyl); N14(Deamidated)	81.63	2	1887.83	1.79339
nVTYGTYLDDPDPDDGFNYK	High	41282022	N1(Deamidated)	81.34	2	2309.98	4.5742
mVVTLTELPSGnDTSGLEnK	High	85861220	M1(Oxidation); N12(Deamidated); N19(Deamidated)	81.15	2	2123.01	3.46066
FFPYAnGTLSIR	High	112293279	N6(Deamidated)	81.09	2	1386.71	2.26747
DGEAFEmnGTEDGR	High	110347545	M7(Oxidation); N8(Deamidated)	81.05	2	1544.58	1.63486
LAVTnTTmTGTVLK	High	31981983	N5(Deamidated); M8(Oxidation)	81.01	2	1466.78	5.16318
SSPDTQDLYcLnESSK	High	6679150	C10(Carbamidomethyl); N12(Deamidated)	80.85	2	1844.79	3.2026
VELVPLPSWQPVGEnFTLScR	High	159110562	N15(Deamidated); C20(Carbamidomethyl)	80.84	2	2429.23	5.8362
NKVnYSYTAVQIPTDIYK	High	291290989	N4(Deamidated)	80.52	2	2118.08	4.41772
NmAnGQPHSVnITR	High	165377150	M2(Oxidation); N4(Deamidated); N11(Deamidated)	80.5	2	1556.71	1.69784
LTPLEQYEQKVnASAPR	High	85861186	N12(Deamidated)	80.42	2	1945.01	5.46212
IISEnKTDEEPGYIK	High	117168299	N5(Deamidated)	80.29	2	1736.87	6.24185
AVISmLnETmNEAPEETK	High	7106409	M5(Oxidation); N7(Deamidated); M10(Oxidation)	80.16	2	2039.92	1.41913
IQDFnYTDHTLGR	High	124487263	N5(Deamidated)	79.79	2	1580.74	1.8072
ncTLLLSTLSPELGGK	High	6754614	N1(Deamidated); C2(Carbamidomethyl)	79.61	2	1703.89	1.1369
VGGPAPSPSVLnVTGVTQR	High	68989243	N12(Deamidated)	79.56	2	1836.99	4.18404
ncTIESTTFYNTDLYK	High	157909825	N1(Deamidated); C2(Carbamidomethyl)	79.08	2	1970.88	4.94517
SLSnENYGVYncSIINEAGAGR	High	514961954	N4(Deamidated); N11(Deamidated); C12(Carbamidomethyl)	78.7	2	2390.09	13.632
TLAGEnQTALEIEELNR	High	153791270	N6(Deamidated)	78.2	2	1901.95	4.20899
KDDEPLETTGDFnTTK	High	226437629	N13(Deamidated)	78	2	1811.82	0.503414
ANELcAAESncSSR	High	84662783	C5(Carbamidomethyl); N10(Deamidated); C11(Carbamidomethyl)	77.74	2	1569.63	2.34161
GTVLcGPPPAVEnASLVGVR	High	40789268	C5(Carbamidomethyl); N13(Deamidated)	77.71	2	1994.04	1.09889
GTEWLVnSSR	High	227497226	N7(Deamidated)	77.66	2	1149.55	0.519721
ISPGKnATGmEVGWYR	High	113199771	N6(Deamidated); M10(Oxidation)	77.64	2	1782.85	2.48607
VSmGQNGDLYFAnVLTSDnHSDYIcNAHFPGTR	High	112293279	M3(Oxidation); N13(Deamidated); N19(Deamidated); C25(Carbamidomethyl)	77.3	3	3719.62	6.32451
AAPYWIVAPQNLVLSPGEnGTLIcR	High	225637535	N19(Deamidated); C24(Carbamidomethyl)	77.26	2	2740.44	8.39914
FHVnYTQPLVAVK	High	7242138	N4(Deamidated)	76.82	2	1516.82	0.695423
SDLnPAnGSYPFQALHQR	High	31560090	N4(Deamidated); N7(Deamidated)	76.57	2	2016.97	14.6583
VLnSTAISLQWNR	High	237858632	N3(Deamidated)	76.53	2	1502.8	3.71181
ENGVFEEISnSSGR	High	153945724	N10(Deamidated)	76.52	2	1525.68	2.86987
SmVDFmNTDnFTSHR	High	84370353	M2(Oxidation); M6(Oxidation); N10(Deamidated)	76.44	2	1834.74	2.50145
KLNLDGSnYTLLK	High	124494256	N8(Deamidated)	76.22	2	1479.81	2.69391
AVISmLnETmnEAPEETK	High	7106409	M5(Oxidation); N7(Deamidated); M10(Oxidation); N11(Deamidated)	76.22	2	2040.9	1.65416
AGVnYTLQVYPDEGYHISDK	High	238776842	N4(Deamidated)	75.92	2	2270.06	1.54954
AFYnGSLTAQIVK	High	6679995	N4(Deamidated)	75.88	2	1412.75	3.92773
LLnATcDEYFTR	High	158711686	N3(Deamidated); C6(Carbamidomethyl)	75.87	2	1503.68	3.60062
GcmESINYNGVnITDLAR	High	165377150	C2(Carbamidomethyl); M3(Oxidation); N12(Deamidated)	75.8	2	2043.92	6.00861
DLQGnPIAnATISVDGIDHDVTSAK	High	22203763	N5(Deamidated); N9(Deamidated)	75.3	2	2554.26	15.8683
EQLFFnLSDPELR	High	112293279	N6(Deamidated)	75.16	2	1608.79	2.63429
VIDLWDLAQSAnFTEK	High	63999380	N12(Deamidated)	74.96	2	1850.92	4.09142
ISTLTFFnVSEK	High	51092272	N8(Deamidated)	74.83	2	1386.72	2.78675
NVETNnSTVLIEGK	High	312032384	N6(Deamidated)	74.41	2	1518.77	5.49096
DYGnYTcVATNK	High	51092272	N4(Deamidated); C7(Carbamidomethyl)	74.22	2	1406.6	4.23799
NNmEITWTPmnATSAFGPNLR	High	237858632;35215309	M3(Oxidation); M10(Oxidation); N11(Deamidated)	74.11	2	2398.1	9.68929
GETASLLcnISVR	High	32189434	C8(Carbamidomethyl); N9(Deamidated)	73.94	2	1420.71	2.32644
IYDISNDmTInEGTnVTLTcLATGKPEPVISWR	High	28893343	M8(Oxidation); N11(Deamidated); N15(Deamidated); C20(Carbamidomethyl)	73.92	3	3726.82	9.18594
ISnVTPADAGIYYcVK	High	294997315	N3(Deamidated); C14(Carbamidomethyl)	73.37	2	1771.86	3.95744
LVVnISDLGYPK	High	422744224	N4(Deamidated)	73.33	2	1318.73	2.43865
SYIFIYDGnKnSTTTDQnFTSAK	High	6754382	N9(Deamidated); N11(Deamidated); N18(Deamidated)	73.24	2	2618.21	12.4595
IAnISmEVGR	High	117168301	N3(Deamidated); M6(Oxidation)	73.23	2	1106.55	1.84888
LEPNSVDPEnITEILIANQK	High	6679150	N10(Deamidated)	73.14	2	2238.16	4.30187
FVSQTNGnLYIAnVESSDRGnYScFVSSPSITK	High	227497226	N8(Deamidated); N13(Deamidated); N21(Deamidated); C24(Carbamidomethyl)	73.06	3	3645.72	18.0289
EATIVGEnETYPR	High	46309573	N8(Deamidated)	72.66	2	1479.7	1.3871
LSnLTEGmLR	High	62990174	N3(Deamidated); M8(Oxidation)	72.34	2	1150.58	1.70256
FVSQTnGNLYIANVESSDRGnYScFVSSPSITK	High	227497226	N6(Deamidated); N21(Deamidated); C24(Carbamidomethyl)	72.14	3	3644.7	8.08863
LYWISSGnHTINR	High	124494256	N8(Deamidated)	72.13	2	1561.78	2.42116
EASnHSSGAGLVQINK	High	14916479	N4(Deamidated)	72.11	2	1612.8	2.59997
EALNQAVnTTR	High	124487155	N8(Deamidated)	72.02	2	1217.62	2.60729
DnATQEEILHYLEK	High	225735655	N2(Deamidated)	71.64	2	1703.82	3.56826
FQLLnFSSSELK	High	71040107	N5(Deamidated)	71.57	2	1413.73	2.36284
NLINDYVSnQTQGmIK	High	309267120	N9(Deamidated); M14(Oxidation)	71.53	2	1854.9	4.82248
GIAnLSNFIR	High	294997315	N4(Deamidated)	71.49	2	1105.6	3.0335
HEnNTKDnSIQHEFSLTR	High	6678347	N3(Deamidated); N8(Deamidated)	71.35	2	2172	2.98033
VInDTWAWK	High	157951706	N3(Deamidated)	71.22	2	1133.57	3.36685
EnGTDAVQEEEESPAEGSK	High	157951706	N2(Deamidated)	71.03	2	2006.83	1.93796
VmSWWDYGYQIAGmAnR	High	61651673	M2(Oxidation); M14(Oxidation); N16(Deamidated)	70.97	2	2080.9	3.97004
AnSTGTLVITNPTR	High	227497226	N2(Deamidated)	70.71	2	1445.76	0.633767
TENLDVIVnISDTESWGQHVQK	High	7242138	N9(Deamidated)	70.69	2	2513.24	9.16574
YIInGSHAnETR	High	226437629	N4(Deamidated); N9(Deamidated)	70.67	2	1376.65	1.30631
IAPASnVSHTVVLRPLK	High	13384850	N6(Deamidated)	70.61	2	1803.05	2.96577
YnLSEVLQGK	High	295390633	N2(Deamidated)	70.59	2	1151.6	2.62274
AEPPLnASAGDQEEK	High	157951706	N6(Deamidated)	70.34	2	1556.71	0.0847303
GSALHEDIYVLHDnGTLEIPVAQK	High	225637535	N14(Deamidated)	70.26	2	2620.34	5.2404
VLTNNPYnDSSLR	High	237858632	N8(Deamidated)	70.05	2	1493.73	2.18156
ADANPPATEYHWTTLnGSLPK	High	40254534	N16(Deamidated)	70.05	2	2284.1	5.25719
VSVVnSTLAEVHWDPVPPK	High	225637535	N5(Deamidated)	69.79	2	2075.09	4.93219
TVVTEAGNLLKDnATQEEILHYLEK	High	225735655	N13(Deamidated)	69.64	3	2829.47	4.89599
ELLSnQSEVmLR	High	58037273	N5(Deamidated); M10(Oxidation)	69.56	2	1435.71	2.10617
QGnASDVILR	High	58037273	N3(Deamidated)	69.55	2	1073.56	2.06911
LnGTDPIVAADSKR	High	124494256	N2(Deamidated)	69.42	2	1457.76	1.201
nSTKEEILAALEK	High	225735655	N1(Deamidated)	69.36	2	1446.77	3.90682
SISnmTSQEFVEK	High	131888529	N4(Deamidated); M5(Oxidation)	69.21	2	1516.69	3.70826
LYWTDGDnISmANmDGSNHTLLFSGQK	High	124494256	N8(Deamidated); M11(Oxidation); M14(Oxidation)	69.21	3	3049.34	5.68538
AFNISPnDTSSGScGINLVTLK	High	113195678	N7(Deamidated); C14(Carbamidomethyl)	69.19	2	2296.12	4.2292
SDLNPAnGSYPFQALHQR	High	31560090	N7(Deamidated)	69.06	2	2015.96	2.98269
EQTVSDPFLVVSnTSTFVPYEIK	High	112293279	N13(Deamidated)	68.94	2	2601.31	4.89167
EIcSGnSSQcAPNVHK	High	56790900	C3(Carbamidomethyl); N6(Deamidated); C10(Carbamidomethyl)	68.72	2	1788.76	0.170243
HmQnLTEEQPIEVK	High	117647249	M2(Oxidation); N4(Deamidated)	68.6	2	1712.82	0.66205
FAEInGSALcSYNIKPSEYTLTSK	High	227499988	N5(Deamidated); C10(Carbamidomethyl)	68.41	3	2694.3	2.70942
YQLGTSPYVYQLTTRPVTDGQPHSVnITR	High	116063560	N26(Deamidated)	68.38	3	3292.68	4.74412
GPDLSncTSPWVNQVAQK	High	157739867	N6(Deamidated); C7(Carbamidomethyl)	68.22	2	2001.94	2.60597
SVLEnTTSYEEAK	High	9790019	N5(Deamidated)	68.21	2	1471.68	1.7078
LNQASFHTPPnVSVcDVNWEK	High	41282044	N11(Deamidated); C15(Carbamidomethyl)	68.12	3	2443.14	3.3302
TVYLHAnQTGYPDPSSR	High	116875858	N7(Deamidated)	68.01	2	1906.9	1.06971
DIYTmmGQnVTLEcFALGNPVPDIR	High	227497226	M5(Oxidation); M6(Oxidation); N9(Deamidated); C14(Carbamidomethyl)	67.81	2	2888.36	15.1287
VTQQSPTSmnQVnLTcR	High	294997315	M9(Oxidation); N10(Deamidated); N13(Deamidated); C16(Carbamidomethyl)	67.72	2	1981.91	4.86128
LEnITTGTYTIHAQK	High	227908803	N3(Deamidated)	67.58	2	1690.87	3.45603
FVSQTnGNLYIANVESSDRGnYScFVSSPSITK	High	227497226	N6(Deamidated); N21(Deamidated); C24(Carbamidomethyl)	67.57	3	3643.73	11.3089
YSGVnLTGFR	High	124487364	N5(Deamidated)	67.5	2	1114.55	1.09046
DEDAENLGHFVmFPAnGSIDLmYFPYYGK	High	7242138	M12(Oxidation); N16(Deamidated); M22(Oxidation)	67.49	3	3373.48	2.75212
ALGYEnATQALGR	High	6755144	N6(Deamidated)	67.37	2	1364.69	3.44472
VGmDGTnQSVVIETK	High	153792247	M3(Oxidation); N7(Deamidated)	67.18	2	1594.77	1.46986
SLWnmSAANNNIK	High	226874869	N4(Deamidated); M5(Oxidation)	66.8	2	1479.69	1.25271
NNEGGVIAQLPSDVTSFnQTGLKPGEEYIVNVVALK	High	226958549	N18(Deamidated)	66.65	3	3802.95	3.55785
LnASLPALLLIR	High	9055172	N2(Deamidated)	66.61	2	1294.81	3.9646
SISEnATATTEPK	High	254692970	N5(Deamidated)	66.58	2	1349.64	1.24899
TVEInLTnDYYLSGGLSEK	High	124486807	N5(Deamidated); N8(Deamidated)	66.49	2	2118.04	13.1147
nVITnQTLnNDTVASSFLK	High	30911107	N1(Deamidated); N5(Deamidated); N9(Deamidated)	66.43	2	2082.06	15.4446
IHETAPDEQSIWnVTVLPnSK	High	35215309	N13(Deamidated); N19(Deamidated)	66.31	2	2380.18	3.79617
LEPnSVDPEnITEILIANQK	High	6679150	N4(Deamidated); N10(Deamidated)	66.16	2	2239.16	13.4009
LAYSGIPLnLTLDNR	High	6679911	N9(Deamidated)	66.06	2	1660.9	3.90931
DSYPDGnITWYR	High	31791059	N7(Deamidated)	66.04	2	1487.65	2.74759
InGTDVDIGmDFR	High	157909807	N2(Deamidated); M10(Oxidation)	65.93	2	1469.66	1.6545
LIPLGVFTGLSnLTK	High	30841016	N12(Deamidated)	65.87	2	1573.93	4.52646
GSEVEDEDLELFnTSVQLRPPSTAPGPETAAFIER	High	226342951	N13(Deamidated)	65.81	3	3803.85	9.62171
FNPIVnKTEIENVR	High	6680522	N6(Deamidated)	65.55	2	1673.89	2.91853
APPGALnLGLSSnNSTLSVAGAmGSHGGEYEcAATnAHGR	High	159110562	N7(Deamidated); N13(Deamidated); M23(Oxidation); C32(Carbamidomethyl); N36(Deamidated)	65.47	3	3915.82	17.0345
IIISPEEnVTLTcTAENQLER	High	31791059	N8(Deamidated); C13(Carbamidomethyl)	65.21	2	2431.22	5.32005
VYInDSVELSR	High	9845246	N4(Deamidated)	65.13	2	1295.65	4.37824
VLTLAnFTTK	High	6678347	N6(Deamidated)	65.08	2	1108.62	-0.414976
LDWLGncSGLnDDSYGYR	High	6753138	N6(Deamidated); C7(Carbamidomethyl); N11(Deamidated)	65.07	2	2106.9	13.3942
IFIFnQTGIEAK	High	52693935	N5(Deamidated)	64.96	2	1381.74	2.02931
IVASDSGKPSLnQTALVR	High	422744224	N12(Deamidated)	64.91	2	1857.01	3.69769
VPPGDTPPGnGSGPR	High	12667794	N10(Deamidated)	64.77	2	1405.67	2.42059
AVQLnETLGNQDK	High	117647249	N5(Deamidated)	64.66	2	1430.72	3.56846
AAnYTSSLNLPDK	High	49274623	N3(Deamidated)	64.63	2	1394.68	2.10769
NTDGTYnYTSLFLVnSSAHR	High	294997315	N7(Deamidated); N15(Deamidated)	64.5	2	2262.03	1.32617
DIILHSTGHnISR	High	27370240	N10(Deamidated)	64.45	2	1463.76	2.34335
TLEnGVnVTVSQINTVLSGR	High	124248484	N4(Deamidated); N7(Deamidated)	64.4	2	2103.1	1.59085
KVEVEPLnSTAVHVSWK	High	115648048	N8(Deamidated)	64.39	3	1924.02	2.44989
AVAYGEKnLTFQGPLPK	High	31560532	N8(Deamidated)	64.32	2	1833.98	3.82102
GGNVLLncSAESDR	High	117168295	N7(Deamidated); C8(Carbamidomethyl)	64.28	2	1492.67	1.31118
SmLLFAnVSAR	High	257096063	M2(Oxidation); N7(Deamidated)	64.07	2	1225.63	3.94885
VIcTGPnDTSPGSPR	High	294997259	C3(Carbamidomethyl); N7(Deamidated)	64.05	2	1558.72	0.346044
AVISmLnETMNEAPEETK	High	7106409	M5(Oxidation); N7(Deamidated)	64.01	2	2023.93	6.21583
VWDTAAALnR	High	254588052	N9(Deamidated)	63.98	2	1117.57	1.69302
AFnLTWISTDFK	High	170172540	N3(Deamidated)	63.92	2	1443.72	2.10301
LAYATInDSR	High	312032384	N7(Deamidated)	63.8	2	1124.56	1.96086
GQcAnGTcLcQEGYAGEDcSQR	High	226958549	C3(Carbamidomethyl); N5(Deamidated); C8(Carbamidomethyl); C10(Carbamidomethyl); C19(Carbamidomethyl)	63.56	2	2521.97	9.1068
LnGTDPIVAADSK	High	124494256	N2(Deamidated)	63.48	2	1301.66	4.09982
ASVDVFGnR	High	110347502	N8(Deamidated)	63.48	2	965.47	1.70612
FDEFFSQGcAPGYEKnSTLcDLcIGPLK	High	20330802	C9(Carbamidomethyl); N16(Deamidated); C20(Carbamidomethyl); C23(Carbamidomethyl)	63.36	3	3254.47	7.33073
IQFGGAnVSGFQIVDYDDSLVSK	High	85861220	N7(Deamidated)	63.31	2	2461.2	10.9181
KENGVFEEISnSSGR	High	153945724	N11(Deamidated)	63.24	2	1653.78	4.41951
mASTFIGnSTAIQELFK	High		M1(Oxidation); N8(Deamidated)	63.11	2	1874.94	11.8096
IGYWNEDDKFVPAATDAQAGGDNSSVQnR	High	356991208	N28(Deamidated)	62.8	3	3126.41	1.48126
GcKDnATDSVPLR	High	124494256	C2(Carbamidomethyl); N5(Deamidated)	62.68	2	1433.67	0.852577
KFHVnYTQPLVAVK	High	7242138	N5(Deamidated)	62.46	2	1644.91	2.49696
LNnITNIGPLDmK	High	188035856	N3(Deamidated); M12(Oxidation)	62.24	2	1459.75	2.56429
ETWNnVTVWGSR	High	237858632;35215309	N5(Deamidated)	62.18	2	1449.68	3.31955
SInVTGQGFSLIQK	High	226958476	N3(Deamidated)	62.08	2	1492.81	3.22897
FnSTEYQVVTR	High	124494256	N2(Deamidated)	62.05	2	1344.65	3.12877
SLWnmSAANnNIK	High	226874869	N4(Deamidated); M5(Oxidation); N10(Deamidated)	61.92	2	1480.68	0.999677
InYTINImELK	High	85861220	N2(Deamidated); M8(Oxidation)	61.91	2	1368.71	1.65877
DITNLInNTFIR	High	34610211	N7(Deamidated)	61.72	2	1434.77	4.38047
FINYnQTVSR	High	85861260	N5(Deamidated)	61.69	2	1242.61	2.0778
TnQSAELIQPVATnGK	High	27370240	N2(Deamidated); N14(Deamidated)	61.68	2	1672.84	0.158788
GYnVTYWWK	High	112293279	N3(Deamidated)	61.64	2	1217.57	2.85844
AnATLLLGPLR	High	40789268	N2(Deamidated)	61.57	2	1139.68	1.96747
NELmLnSSLmR	High	344217723	M4(Oxidation); N6(Deamidated); M10(Oxidation)	61.54	2	1340.62	1.76031
VQnmSQSIEVLDR	High	84370353	N3(Deamidated); M4(Oxidation)	61.54	2	1535.74	2.72587
LnASIADLQSK	High	124487155	N2(Deamidated)	61.43	2	1160.62	3.65789
LFNGQQGIIIQnFSTR	High	28893343	N12(Deamidated)	61.36	2	1836.97	5.464
LDnYSTQELGR	High	6754900	N3(Deamidated)	61.31	2	1296.61	2.77631
TcVSncTASQFVcK	High	124494256	C2(Carbamidomethyl); N5(Deamidated); C6(Carbamidomethyl); C13(Carbamidomethyl)	61.29	2	1662.7	3.86999
LEQNFFncScDIR	High	33413429	N7(Deamidated); C8(Carbamidomethyl); C10(Carbamidomethyl)	61.28	2	1703.72	2.49144
GYLLTLnFTK	High	113195678	N7(Deamidated)	61.13	2	1170.64	3.66096
AYNTAGTGPSSLPVnVTTK	High	31980846	N15(Deamidated)	61.1	2	1878.95	3.10046
GnETIVNLIHSTR	High	22203763	N2(Deamidated)	60.9	2	1454.77	3.92725
LSDTAnYTcVAK	High	6678505	N6(Deamidated); C9(Carbamidomethyl)	60.84	2	1343.62	2.62904
FGTcSQLcnNTK	High	124494256	C4(Carbamidomethyl); C8(Carbamidomethyl); N9(Deamidated)	60.73	2	1430.61	0.941495
TFAFISNQPGEGEAnSTR	High	30841016	N15(Deamidated)	60.55	2	1926.89	4.54196
VLTNQESPYQnHTGR	High	124286805	N11(Deamidated)	60.54	2	1744.83	1.35876
WTGHnVTVVQR	High	124494256	N5(Deamidated)	60.52	2	1297.67	1.90852
FKLDWLGncSGLnDDSYGYR	High	6753138	N8(Deamidated); C9(Carbamidomethyl); N13(Deamidated)	60.46	3	2382.07	15.3008
LLnTTDVYLLPSLNPDGFER	High	150378501	N3(Deamidated)	60.43	2	2278.17	5.55351
SEmmYGnETELK	High	124486807	M3(Oxidation); M4(Oxidation); N7(Deamidated)	60.29	2	1464.59	0.169674
LnnITNIGPLDmK	High	188035856	N2(Deamidated); N3(Deamidated); M12(Oxidation)	60.14	2	1460.74	4.14541
VFGSQnLTTVK	High	157951706	N6(Deamidated)	60.09	2	1194.64	3.16337
FEnQTcFPLPDSR	High	197333685	N3(Deamidated); C6(Carbamidomethyl)	59.95	2	1611.72	3.49129
DLNLmnVTWK	High	226437629	M5(Oxidation); N6(Deamidated)	59.87	2	1250.61	3.47856
KVLVAPPSEEAnTTK	High	7106409	N12(Deamidated)	59.87	2	1584.85	-0.114447
YSGVnmTGFR	High	163659879	N5(Deamidated); M6(Oxidation)	59.61	2	1148.51	1.97035
DVmQVAnTTmSSR	High	112983656	M3(Oxidation); N7(Deamidated); M10(Oxidation)	59.52	2	1472.64	1.7546
LAFLmInDSLVPNmIIPR	High	238776842	M5(Oxidation); N7(Deamidated); M14(Oxidation)	59.5	2	2090.11	5.14879
IKTPEKnDTAAAGQGER	High	154240716	N7(Deamidated)	59.27	2	1786.9	1.59177
LSYNVIPLnLTLDNR	High	6679909	N9(Deamidated)	59.26	2	1745.95	4.12369
FInSTFLEQK	High	157909825	N3(Deamidated)	59.23	2	1227.63	2.51086
LVDnGTLLYTmR	High	247269171	N4(Deamidated); M11(Oxidation)	59.21	2	1412.71	3.87399
LNLDGSnYTLLK	High	124494256	N7(Deamidated)	59.14	2	1351.72	3.67114
RAnASTFAVPSPVSNSADTR	High	31982223	N3(Deamidated)	59.02	2	2049.01	4.59417
FVSNQTmYYSWEGnPInIScDVTANPPASIHWR	High	6754920	M7(Oxidation); N14(Deamidated); N17(Deamidated); C20(Carbamidomethyl)	58.93	3	3873.75	9.3145
LTnVTRPTGVVTSLHR	High	154090989	N3(Deamidated)	58.88	3	1751.98	3.46333
nGQGSNLDGGNYHVYEnGSLEIK	High	237858632;35215309	N1(Deamidated); N17(Deamidated)	58.88	2	2467.12	7.22164
LSGnLTLLR	High	6679389	N4(Deamidated)	58.85	2	987.587	3.39233
SLWnmSAAnnNIK	High	226874869	N4(Deamidated); M5(Oxidation); N9(Deamidated); N10(Deamidated)	58.83	2	1481.67	9.80953
FVSnQTmYYSWEGnPInIScDVTANPPASIHWR	High	6754920	N4(Deamidated); M7(Oxidation); N14(Deamidated); N17(Deamidated); C20(Carbamidomethyl)	58.6	3	3874.77	16.8711
EEnATIATYPEFGVLDLK	High	6680744	N3(Deamidated)	58.55	2	2011	5.12524
QnITYLLK	High	226874869	N2(Deamidated)	58.43	2	993.563	1.74395
DVGSGTTnnSQAcAQFLEQYFHnSDLTEFmR	High	6753448	N8(Deamidated); N9(Deamidated); C13(Carbamidomethyl); N23(Deamidated); M30(Oxidation)	58.27	3	3586.54	11.539
GEnFTETDVK	High	506326231	N3(Deamidated)	58.23	2	1140.51	1.46641
AnDSDQGAnAEIDYTFHQAPEVVR	High	34328319	N2(Deamidated); N9(Deamidated)	58.21	3	2649.2	10.4461
LSLSEnYTLSIANAK	High	31791059	N6(Deamidated)	58.18	2	1624.84	-0.572829
LGTEAmSTnHSVIVNSPVITAAINK	High	58037543	M6(Oxidation); N9(Deamidated)	58.16	2	2584.33	0.697165
SAFDPPNFPIcLLGnR	High	158711686	C11(Carbamidomethyl); N15(Deamidated)	58.14	2	1818.89	5.45024
LVnSTFLHNK	High	11528518	N3(Deamidated)	57.89	2	1173.63	2.27205
VIEEFYnQTWNHR	High	165377226	N7(Deamidated)	57.79	2	1737.82	17.7114
APDSnSSSLLITTR	High	31560063	N5(Deamidated)	57.76	2	1462.74	2.01219
KKEnGVFEEISnSSGR	High	153945724	N4(Deamidated); N12(Deamidated)	57.63	2	1782.86	5.32832
KmLSAFnATSGK	High	31560063	M2(Oxidation); N7(Deamidated)	57.54	2	1271.63	1.51247
DVnYTQIVVDR	High	49274623	N3(Deamidated)	57.46	2	1322.66	0.939325
LSYnVIPLnLTLDNR	High	6679909	N4(Deamidated); N9(Deamidated)	57.44	2	1746.93	3.83773
YYnYTLSInGK	High	29789239	N3(Deamidated); N9(Deamidated)	57.37	2	1337.63	1.30817
LNKFLEPYnDSIQAQK	High	7242138	N9(Deamidated)	57.2	2	1908.98	5.64035
VKDLmVInR	High	326937503	M5(Oxidation); N8(Deamidated)	57.15	2	1104.61	2.19172
IHVAGGTHSVnQTVnK	High	208609941	N11(Deamidated); N15(Deamidated)	57	2	1663.84	2.4993
AnSTGILSVR	High	54607084	N2(Deamidated)	56.81	2	1018.55	1.30327
LVQVGIYnGTHVIPNDR	High	294997259	N8(Deamidated)	56.59	2	1896.01	6.32366
FQDSSVFnETLR	High	514961954	N8(Deamidated)	56.43	2	1443.68	2.95189
LSPYVnYSFR	High	225637535	N6(Deamidated)	56.37	2	1246.61	2.53777
YSGnYTIDPDGSGPLKPFVVYcDIR	High	116063560	N4(Deamidated); C22(Carbamidomethyl)	56.09	3	2834.35	3.98077
YLInVTFEGR	High	117168299	N4(Deamidated)	56.05	2	1212.63	3.37711
YAQVQDnGTYLcIAANAGGnDSmPAHLHVR	High	30841016	N7(Deamidated); C12(Carbamidomethyl); N20(Deamidated); M23(Oxidation)	55.81	3	3263.49	16.6576
NmANGQPHSVnITR	High	165377150	M2(Oxidation); N11(Deamidated)	55.8	2	1555.73	1.23276
LmnAPLYLAEWQnITK	High	238637279	M2(Oxidation); N3(Deamidated); N13(Deamidated)	55.6	2	1922.98	11.7055
DFLnYTLEER	High	261862282	N4(Deamidated)	55.55	2	1300.61	3.30121
TEnLDVIVnISDTESWGQHVQK	High	7242138	N3(Deamidated); N9(Deamidated)	55.45	2	2514.23	12.8006
ENScmVYnDTTmVcR	High	6679389	C4(Carbamidomethyl); M5(Oxidation); N8(Deamidated); M12(Oxidation); C14(Carbamidomethyl)	55.18	2	1912.72	2.41987
nNmEITWTPmnATSAFGPNLR	High	237858632;35215309	N1(Deamidated); M3(Oxidation); M10(Oxidation); N11(Deamidated)	54.9	2	2399.06	-0.239676
FVSNQTmYYSWEGNPInIScDVTANPPASIHWR	High	6754920	M7(Oxidation); N17(Deamidated); C20(Carbamidomethyl)	54.85	3	3872.77	8.56226
GIAnLSnFIR	High	294997315	N4(Deamidated); N7(Deamidated)	54.77	2	1106.59	3.1346
LnmTLPDALVPTFSISnHSLK	High	113195678	N2(Deamidated); M3(Oxidation); N17(Deamidated)	54.49	2	2316.19	5.99455
AnNSWFQSILK	High	224809376	N2(Deamidated)	54.46	2	1308.66	3.11296
AnATIEVK	High	153945724	N2(Deamidated)	54.37	2	846.458	1.37755
YTGnASALLILPDQGR	High	309267120	N4(Deamidated)	54.26	2	1689.88	2.29115
GKAnSTGTLVITnPTR	High	227497226	N4(Deamidated); N13(Deamidated)	54.24	2	1631.89	17.1726
AmnSSSFEGVSGHVVFDASGSR	High	131888529	M2(Oxidation); N3(Deamidated)	54.17	3	2244.99	1.7074
EPSnATQLDGPAR	High	6753150	N4(Deamidated)	53.98	2	1356.64	2.443
QnGSANSATNPAGLDK	High	16506279	N2(Deamidated)	53.98	2	1545.72	1.90154
NFPDAFENNnVTK	High	189458849	N10(Deamidated)	53.96	2	1510.68	2.52381
AGVnYTLQVYPDEGYHISDK	High	238776842	N4(Deamidated)	53.96	3	2271.07	10.6235
LEQmTmNInLTGPLPAPYK	High	117647249	M4(Oxidation); M6(Oxidation); N9(Deamidated)	53.93	2	2164.08	4.01354
LDPPcTnTTAPSNYLNNPYVR	High	84042523	C5(Carbamidomethyl); N7(Deamidated)	53.92	2	2408.12	1.08557
ALAGLVYnSSGTEPcYDIYR	High	31981425	N8(Deamidated); C15(Carbamidomethyl)	53.82	2	2250.04	2.59806
VVLGEnLTSNcPEVIYEIK	High	9055376	N6(Deamidated); C11(Carbamidomethyl)	53.57	2	2178.11	2.77917
AHNELGTnSTSLR	High	238859616	N8(Deamidated)	53.5	2	1400.68	1.61439
VnYTmDVFELK	High	164419755	N2(Deamidated); M5(Oxidation)	53.44	2	1375.65	2.58414
YEQAKnISQDLEK	High	153791270	N6(Deamidated)	53.44	2	1566.77	2.29056
InYTcNQGYR	High	52426750	N2(Deamidated); C5(Carbamidomethyl)	53.35	2	1289.56	1.87586
VInFYAGAnQSmnVTcVGK	High	7242138	N3(Deamidated); N9(Deamidated); M12(Oxidation); N13(Deamidated); C16(Carbamidomethyl)	53.2	2	2091.97	14.0373
GEGnETNNmVITWKPLR	High	112293279	N4(Deamidated); M9(Oxidation)	53.15	2	1975.95	0.107833
nVSYnISSTVR	High	294997315	N1(Deamidated); N5(Deamidated)	53.09	2	1241.6	1.39607
YYHGELSYLnVTR	High	6753556	N10(Deamidated)	52.96	2	1615.78	2.08734
GnITEYQcHQYITK	High	6677905	N2(Deamidated); C8(Carbamidomethyl)	52.95	2	1755.8	2.37263
nSTLcDLcIGPLK	High	20330802	N1(Deamidated); C5(Carbamidomethyl); C8(Carbamidomethyl)	52.6	2	1491.72	2.00688
LTEFTHnSTmDYK	High	109627652	N7(Deamidated); M10(Oxidation)	52.32	2	1603.7	1.82266
NNEGGVIAQLPSDVTSFnQTGLKPGEEYIVNVVALK	High	226958549	N18(Deamidated)	52.24	3	3801.98	6.06501
AEGDVGPPPSTLINQnETFAK	High	27369644	N16(Deamidated)	52.14	2	2186.08	6.6118
GDEKEnITAEALDLSLK	High	159110717	N6(Deamidated)	52.12	2	1846.93	2.1924
YDIFQYQTTnTTNPGYR	High	60460877	N10(Deamidated)	52.07	2	2082.96	8.96545
VnGTDLAPDLLnGSQLILR	High	225703147	N2(Deamidated); N12(Deamidated)	52.03	2	2011.08	3.8912
LQNnISYQmADIHHLK	High	158711675	N4(Deamidated); M9(Oxidation)	51.93	3	1941.95	2.75672
nALGTAnQTInGHFLK	High	33413429	N1(Deamidated); N7(Deamidated); N11(Deamidated)	51.83	2	1701.87	17.129
VnSSQALPVDGGEVK	High	226958327	N2(Deamidated)	51.8	2	1500.76	3.06997
VSmGQnGDLYFANVLTSDnHSDYIcnAHFPGTR	High	112293279	M3(Oxidation); N6(Deamidated); N19(Deamidated); C25(Carbamidomethyl); N26(Deamidated)	51.8	3	3720.64	14.3919
VmHGGAnITGFQIVNNENPmVQQFIQR	High	163792196	M2(Oxidation); N7(Deamidated); M20(Oxidation)	51.79	3	3075.49	2.93292
YLnETQQLTQK	High	31982171	N3(Deamidated)	51.77	2	1366.69	3.80026
RGcKDnATDSVPLR	High	124494256	C3(Carbamidomethyl); N6(Deamidated)	51.66	3	1589.77	1.30749
nVTALLmEAR	High	294997259	N1(Deamidated); M7(Oxidation)	51.61	2	1134.59	2.40467
FYPEDLQLIWLEnGnVSR	High	294997315	N13(Deamidated); N15(Deamidated)	51.6	2	2196.06	5.21545
EnGVFEEISnSSGR	High	153945724	N2(Deamidated); N10(Deamidated)	51.55	2	1526.66	2.06371
IYnASELPVR	High	41351529	N3(Deamidated)	51.51	2	1162.61	1.96895
InFTAPFNPNK	High	32469489	N2(Deamidated)	51.42	2	1263.64	2.62497
IISEnKTDEEPGYIKK	High	117168299	N5(Deamidated)	51.32	2	1864.96	2.47533
nATGmEVGWYR	High	113199771	N1(Deamidated); M5(Oxidation)	51.31	2	1300.57	2.68145
DSYPDGnITWYRnGK	High	31791059	N7(Deamidated); N13(Deamidated)	51.31	2	1787.79	1.08335
IETILLnGTDR	High	124494256	N7(Deamidated)	51.18	2	1245.67	4.16349
GGSLWLncSTncPRPER	High	159110562	N7(Deamidated); C8(Carbamidomethyl); N11(Deamidated); C12(Carbamidomethyl)	51.12	3	2005.92	16.4468
AFmnSSFTIDPK	High	27734847	M3(Oxidation); N4(Deamidated)	51.08	2	1374.63	2.50035
VPGADTQYFVYSnDSIHPYTPFEVK	High	54607084	N13(Deamidated)	50.96	3	2875.36	3.61842
YAVYWnSSNPR	High	6753724	N6(Deamidated)	50.84	2	1357.62	3.37679
NSYQLcNnGTLR	High	154090989	C6(Carbamidomethyl); N8(Deamidated)	50.8	2	1440.66	2.09801
TLFLFPnQTGFPSK	High	157951690	N7(Deamidated)	50.78	2	1597.83	3.26012
IVSNncTDGLR	High	23956144	N5(Deamidated); C6(Carbamidomethyl)	50.7	2	1249.59	2.32271
NnVTEIQGIPGAASGLIK	High	158711686	N2(Deamidated)	50.52	2	1782.97	3.66626
LSALDNLLnHSSIFLK	High	157951706	N9(Deamidated)	50.44	2	1785.98	1.81049
NALGTAnQTInGHFLK	High	33413429	N7(Deamidated); N11(Deamidated)	50.31	2	1700.87	4.51194
HVTDmnSTIHLLR	High	148747408	M5(Oxidation); N6(Deamidated)	50.18	3	1553.78	1.59106
GELnSTLFSSRPK	High	13385294	N4(Deamidated)	50.14	2	1436.74	4.01931
TSLDWWTTDTcNmInGTDGDSFHPLISK	High	6680878	C11(Carbamidomethyl); M13(Oxidation); N15(Deamidated)	50.01	3	3229.43	6.05546
ANYNLPImVTDSGKPPmTnITDLR	High	110625609	M8(Oxidation); M17(Oxidation); N19(Deamidated)	50	3	2694.32	2.77827
WInDTVVVYK	High	238776842	N3(Deamidated)	49.96	2	1237.65	2.70553
IKLDnYSTQELGR	High	6754900	N5(Deamidated)	49.94	2	1537.79	2.84132
QTLFFnGTR	High	23346547	N6(Deamidated)	49.78	2	1084.54	2.07819
LLLPAKnTTHLK	High	6754920	N7(Deamidated)	49.73	2	1349.82	3.30442
nLSFSEDGYQmHPK	High	117168299	N1(Deamidated); M11(Oxidation)	49.65	2	1669.72	2.28665
SFnATAERGEEmTLTcK	High	6754920	N3(Deamidated); M12(Oxidation); C16(Carbamidomethyl)	49.59	2	1961.86	2.21014
VDQnDnTSLQWSNPAQQTLYFDDK	High	225543375	N4(Deamidated); N6(Deamidated)	49.59	2	2829.3	16.5322
TnYTIDVYEmK	High	163792196	N2(Deamidated); M10(Oxidation)	49.35	2	1393.62	3.04845
IGSYnGTAGDSLSYHQGRPFSTEDR	High	226958549	N5(Deamidated)	49.18	3	2716.23	2.97221
VYmKnVTVVLR	High	113195678	M3(Oxidation); N5(Deamidated)	48.97	2	1338.75	2.73578
DYYPInESLASLPLR	High	103472025	N6(Deamidated)	48.95	2	1751.9	5.89992
TEAGVFEYVADPTFEnFTGGVK	High	226958476	N16(Deamidated)	48.92	2	2379.12	6.78267
LnYTLVGEPLR	High	132626295	N2(Deamidated)	48.9	2	1275.7	2.58849
VQnVSQSmEVLELR	High	148747133	N3(Deamidated); M8(Oxidation)	48.87	2	1648.83	2.9312
TYcANEPLSncSQVnR	High	8393787	C3(Carbamidomethyl); N10(Deamidated); C11(Carbamidomethyl); N15(Deamidated)	48.84	2	1914.8	3.37388
KnNmEITWTPmnATSAFGPNLR	High	237858632;35215309	N2(Deamidated); M4(Oxidation); M11(Oxidation); N12(Deamidated)	48.83	2	2527.2	14.4568
VLKDAVNnITAK	High	161086902	N8(Deamidated)	48.74	2	1286.73	2.55026
GPcSHLcLINYnR	High	124494256	C3(Carbamidomethyl); C7(Carbamidomethyl); N12(Deamidated)	48.65	2	1604.74	5.18965
FDEVYDALAGAHPnLTVYK	High	271397963	N14(Deamidated)	48.4	3	2124.04	3.2133
EcLGncSEPDDPTK	High	157057178	C2(Carbamidomethyl); N5(Deamidated); C6(Carbamidomethyl)	48.38	2	1622.63	1.39958
HNEQnLSLADVTQQAGLVK	High	116089339	N5(Deamidated)	48.38	3	2066.06	2.63282
nESLETYPLmmK	High	6753138	N1(Deamidated); M10(Oxidation); M11(Oxidation)	48.28	2	1488.66	1.96012
LGcWNPVTGLnGSLTDK	High	6680091	C3(Carbamidomethyl); N11(Deamidated)	48.28	2	1832.89	5.52883
IDVnSWIEnFTK	High	161086902	N4(Deamidated); N9(Deamidated)	48.25	2	1467.71	3.56245
TFASHnASGGSSAGLR	High	158937286	N6(Deamidated)	48.23	2	1520.71	-0.540465
IQATSLSGnGSWTDPVFFYVPAK	High	112983656	N9(Deamidated)	48.22	2	2487.24	14.0856
LDLSNNnLTTLPR	High	41351537	N7(Deamidated)	48.06	2	1471.78	3.17674
IETILLnGTDRK	High	124494256	N7(Deamidated)	47.95	2	1373.77	2.79835
NPcTSEQncTSPFSYK	High	45504394	C3(Carbamidomethyl); N8(Deamidated); C9(Carbamidomethyl)	47.85	2	1920.78	4.67477
YQLGTSPYVYQLTTRPVTDGQPHSVnITR	High	116063560	N26(Deamidated)	47.84	3	3293.69	12.6347
VPAELnGSmYR	High	38348466	N6(Deamidated); M9(Oxidation)	47.83	2	1253.59	3.93909
LIASnITETmR	High	89242146	N5(Deamidated); M10(Oxidation)	47.72	2	1265.64	2.43517
SAEGTFFInK	High	67514549	N9(Deamidated)	47.67	2	1114.54	2.72395
LDAPTNLQFVnETDR	High	449083347	N11(Deamidated)	47.57	2	1733.85	6.76271
DSGAPAHLESnATVR	High	260763908	N11(Deamidated)	47.55	2	1525.73	1.90144
VSPDHQPQPQYVSYnQSSYTQWNLQPDTK	High	112293279	N15(Deamidated)	47.29	3	3438.58	12.3566
NGQGSNLDGGnYHVYEnGSLEIK	High	237858632;35215309	N11(Deamidated); N17(Deamidated)	47.22	2	2468.12	13.9917
DLGPALAnSSHDVK	High	116734815	N8(Deamidated)	47.17	2	1424.71	2.42747
WSYVAYnESDK	High	254028203	N7(Deamidated)	46.95	2	1362.59	2.61209
SLDNDNYVFTAPYFnK	High	161086902	N15(Deamidated)	46.95	2	1908.87	3.87497
WSYnNSETSR	High	61656194	N4(Deamidated)	46.87	2	1244.52	2.47029
VQQVGHYPPAnSSLASR	High	88196788	N11(Deamidated)	46.83	2	1811.91	1.65265
GnGTLITFHSAFQccGK	High	341823657	N2(Deamidated); C14(Carbamidomethyl); C15(Carbamidomethyl)	46.76	2	1898.86	3.92635
NPnGTVTVISR	High	40254534	N3(Deamidated)	46.63	2	1158.61	2.73797
NAIQAFGnGTDVNmSPK	High	84662783	N8(Deamidated); M14(Oxidation)	46.2	2	1780.82	3.45766
AYnSAGTGPSSATVnVTTR	High	157909807	N3(Deamidated); N15(Deamidated)	46.17	2	1855.87	3.86758
YnYTEDPTILR	High	6679389	N2(Deamidated)	46.08	2	1385.66	2.64682
NTDGTYnYTSLFLVNSSAHR	High	294997315	N7(Deamidated)	46.08	2	2261.06	7.10665
ALVTLEGIPAAVPGQPAELQLnVTK	High	159110562	N22(Deamidated)	45.99	2	2530.42	4.75611
DGLALnLTLR	High	31982223	N6(Deamidated)	45.82	2	1086.62	2.80549
SSSHLPPSSYFnASGR	High	6753448	N12(Deamidated)	45.77	2	1694.78	4.01332
VnGTLTQVLLVGAPTHDDVSK	High	111378397	N2(Deamidated)	45.72	3	2166.15	9.09516
nnmEITWTPmnATSAFGPNLR	High	237858632;35215309	N1(Deamidated); N2(Deamidated); M3(Oxidation); M10(Oxidation); N11(Deamidated)	45.72	2	2400.08	15.0665
HInLTTLSVAGGFR	High	254028203	N3(Deamidated)	45.64	2	1486.81	3.85869
ETLVTLFDnR	High	164698432	N9(Deamidated)	45.6	2	1208.62	3.31062
TnSSFIQGFVDHVK	High	225735655	N2(Deamidated)	45.56	2	1579.78	1.25961
nETHSIcSAcDEScK	High	21313278	N1(Deamidated); C7(Carbamidomethyl); C10(Carbamidomethyl); C14(Carbamidomethyl)	45.52	2	1798.67	0.696966
ncTGPVSPHQIK	High	29244160	N1(Deamidated); C2(Carbamidomethyl)	45.37	2	1338.65	1.93815
SDVPnTSPnSTSQHVAEFETER	High	124486807	N5(Deamidated); N9(Deamidated)	45.36	2	2435.08	11.4107
YTSDPnVTSVGPSK	High	225690610	N6(Deamidated)	45.33	2	1452.69	2.36871
SFSGLLDcGncSR	High	161086902	C8(Carbamidomethyl); N10(Deamidated); C11(Carbamidomethyl)	45.29	2	1473.61	3.00488
AnQTALcGGGVQTR	High	259013354	N2(Deamidated); C7(Carbamidomethyl)	45.22	2	1433.68	2.55579
TAnHSAPSLENSVQPGK	High	224994186	N3(Deamidated)	45.2	2	1737.85	3.00331
VDVmnSTLVK	High	110347545	M4(Oxidation); N5(Deamidated)	45.07	2	1122.57	1.46022
ASPIYELVTNnQTQR	High	46488926	N11(Deamidated)	45.02	2	1734.87	4.01814
HVYNnLTEEQK	High	31542035	N5(Deamidated)	44.96	2	1375.65	2.38426
VTnLSDPVVLTFQHQPQPK	High	312032400	N3(Deamidated)	44.91	2	2149.14	6.51077
mHLnGSNVQVLHR	High	124494256	M1(Oxidation); N4(Deamidated)	44.84	2	1521.76	1.73092
AVISmLnETmNEAPEETKIVIKK	High	7106409	M5(Oxidation); N7(Deamidated); M10(Oxidation)	44.84	3	2621.35	2.50148
SLGQNPTEAELQDmINEVDADGnGTIDFPEFLTmmAR	High	6680832	M14(Oxidation); N23(Deamidated); M34(Oxidation); M35(Oxidation)	44.8	3	4120.86	18.7574
nSSHLVcSAcFGPcAR	High	19527148	N1(Deamidated); C7(Carbamidomethyl); C10(Carbamidomethyl); C14(Carbamidomethyl)	44.78	2	1823.77	4.41501
NPcnSSVLQDGR	High	150378487	C3(Carbamidomethyl); N4(Deamidated)	44.72	2	1347.6	1.22322
VLQFDPGTKnVTALLmEAR	High	294997259	N10(Deamidated); M16(Oxidation)	44.67	2	2120.11	2.5467
IIAAnNSGTFK	High	110347545	N5(Deamidated)	44.64	2	1136.6	2.13461
HnLTIFFDVK	High	9625018	N2(Deamidated)	44.58	2	1234.65	2.83221
WVEnYTNSLLK	High	6678091	N4(Deamidated)	44.53	2	1367.69	2.80662
KnGTFLTLR	High	170172540	N2(Deamidated)	44.47	2	1050.6	1.52817
VLTLAnFTTKDEGDYFcELQVSGANPmSSnK	High	6678347	N6(Deamidated); C17(Carbamidomethyl); M27(Oxidation); N30(Deamidated)	44.41	3	3455.57	6.98695
KnASSVVPSSVHNSANQR	High	281182810	N2(Deamidated)	44.38	3	1882.94	3.22625
SRnSTVEYSLSK	High	110625645	N3(Deamidated)	44.37	2	1371.68	1.96451
LVQVGIYnGTHVIPNDRK	High	294997259	N8(Deamidated)	44.23	3	2024.1	3.65562
TVNSLnVSAISIPEHDEADDISDENR	High	31791059	N6(Deamidated)	44.23	3	2841.31	3.37676
DIYTmmGQnVTLEcFALGNPVPDIR	High	227497226	M5(Oxidation); M6(Oxidation); N9(Deamidated); C14(Carbamidomethyl)	44.22	3	2887.34	4.60467
STEGQSSLTVTnVTEEHYGnYTcVAANK	High	30425330	N12(Deamidated); N20(Deamidated); C23(Carbamidomethyl)	44.21	3	3062.36	2.69957
RTnYTIDVYEmK	High	163792196	N3(Deamidated); M11(Oxidation)	44.2	2	1549.73	5.62628
LSQALGnITVVQK	High	298676452	N7(Deamidated)	44.04	2	1371.79	3.79724
VDHESLnATPQVAmQVLEIHYTPSVK	High	225543375	N7(Deamidated); M14(Oxidation)	43.89	3	2923.47	5.70146
ALVnFTR	High	183979966	N4(Deamidated)	43.82	2	821.453	2.04195
EYEGAVYPDnTTDFQR	High	110347564	N10(Deamidated)	43.79	2	1905.82	1.14296
INNDPDLLPnITLGAR	High	62945392	N10(Deamidated)	43.78	2	1736.93	4.88785
DPAGWLSInPInGTVDTTAVLDR	High	110625609	N9(Deamidated); N12(Deamidated)	43.76	2	2427.22	7.43159
YmALALnR	High	133778924	M2(Oxidation); N7(Deamidated)	43.75	2	968.488	0.655829
LLFPTnSSSR	High	112293279	N6(Deamidated)	43.7	2	1122.58	1.21378
GnISSAPAPAmPTALHSK	High	36054013	N2(Deamidated); M11(Oxidation)	43.64	2	1766.88	1.27917
WNRGnESLPER	High	23346547	N5(Deamidated)	43.62	2	1358.65	3.14883
LQVTLYncSFGR	High	226958476	N7(Deamidated); C8(Carbamidomethyl)	43.59	2	1458.71	1.51738
ENSKQnGSANSATNPAGLDK	High	16506279	N6(Deamidated)	43.51	2	2004.94	14.7325
KLVQVGIYnGTHVIPNDRK	High	294997259	N9(Deamidated)	43.35	3	2152.2	3.92048
VAFVLYnnLGPYLSTEnASmK	High	58037543	N7(Deamidated); N8(Deamidated); N17(Deamidated); M20(Oxidation)	43.34	2	2350.15	13.6172
ELNILFLnK	High	225543375	N8(Deamidated)	43.27	2	1104.63	2.8217
HAPDIPDDSTDnITIFTR	High	247269171	N12(Deamidated)	43.07	2	2028.96	4.63166
nSTIQAANLAGLK	High	30089677	N1(Deamidated)	43.04	2	1301.71	3.72258
RAnQTALcGGGVQTR	High	259013354	N3(Deamidated); C8(Carbamidomethyl)	42.98	2	1589.78	0.740354
FLEPYnDSIQAQK	High	7242138	N6(Deamidated)	42.96	3	1554.76	17.6197
WGHnVTEFQQR	High	7657067	N4(Deamidated)	42.85	2	1402.65	1.87225
RnESHLIDFR	High	224994186	N2(Deamidated)	42.84	3	1287.65	1.32708
LVAIAVIDEKnTSLEHTR	High	117606385	N11(Deamidated)	42.83	3	2010.09	3.04478
mnITSIAPLLEK	High	37620157	M1(Oxidation); N2(Deamidated)	42.75	2	1346.73	6.09388
HEnnTKDnSIQHEFSLTR	High	6678347	N3(Deamidated); N4(Deamidated); N8(Deamidated)	42.68	3	2173.01	12.2665
RNPEAGVATTDLYGncTLR	High	6679229	N15(Deamidated); C16(Carbamidomethyl)	42.65	3	2109.01	2.63051
WTGQnVSVIQK	High	153792247	N5(Deamidated)	42.6	2	1260.66	1.9727
WPADKEnDTGIVGQHSScDVR	High	161484610	N7(Deamidated); C18(Carbamidomethyl)	42.42	3	2372.05	-1.20352
SPAnGSLGPmLnLSSGESR	High	110225379	N4(Deamidated); M10(Oxidation); N12(Deamidated)	42.36	2	1891.88	6.38175
SSPDTQDLYcLnESSK	High	6679150	C10(Carbamidomethyl); N12(Deamidated)	42.23	2	1845.8	14.9027
VSPDHQPQPQYVSYnQSSYTQWNLQPDTK	High	112293279	N15(Deamidated)	42.2	3	3436.59	6.08079
SVAQnYSSITHLHSIGK	High	189458849	N5(Deamidated)	41.98	2	1843.94	12.9044
SLGQNPTEAELQDmINEVDADGnGTIDFPEFLTmmAR	High	6680832	M14(Oxidation); N23(Deamidated); M34(Oxidation); M35(Oxidation)	41.98	3	4119.86	13.5193
mVnHSLHPTEPVK	High	86990446	M1(Oxidation); N3(Deamidated)	41.89	3	1505.75	2.58166
VnLTGTPSQR	High	162417988	N2(Deamidated)	41.88	2	1073.56	2.07842
LLnLTSPEATAK	High	161484610	N3(Deamidated)	41.87	2	1258.69	2.36343
DTAVEGEEIEVncTAmASKPATTIR	High	71040107	N12(Deamidated); C13(Carbamidomethyl); M16(Oxidation)	41.81	3	2710.26	1.50425
QEnISVGSVLLTVnATDPDSLQHQTIR	High	110625609	N3(Deamidated); N14(Deamidated)	41.71	3	2938.49	9.5843
LFQncSELYK	High	160333208	N4(Deamidated); C5(Carbamidomethyl)	41.65	2	1302.61	2.57777
VnSSLHSQISR	High	153791270	N2(Deamidated)	41.58	2	1228.63	2.70053
GSSVILncSAYSEPSPNIEWK	High	112363084	N7(Deamidated); C8(Carbamidomethyl)	41.55	2	2339.1	4.3383
nETIWYVR	High	19526978	N1(Deamidated)	41.52	2	1081.53	2.23914
YADTIYnISmK	High	228008369	N7(Deamidated); M10(Oxidation)	41.44	2	1335.62	3.90215
LSYSGIPLnLTLDNR	High	6679907	N9(Deamidated)	41.43	2	1676.89	4.28675
WEnQTLSLR	High	41680705	N3(Deamidated)	41.38	2	1147.58	2.34807
VNTLEEGKGGPKnDTEER	High	6679120	N13(Deamidated)	41.23	2	1973.95	3.24227
QTFPVPQnISQR	High	6680091	N8(Deamidated)	41.21	2	1415.73	3.63801
IPFnLSEWQK	High	158533990	N4(Deamidated)	41.16	2	1262.65	3.31229
FYPEDLQLIWLENGnVSR	High	294997315	N15(Deamidated)	41.1	2	2194.08	0.664565
NQKDEInETDLK	High	238637279	N7(Deamidated)	41.09	2	1447.69	1.80693
YDIFQYQTTnTTNPGYR	High	60460877	N10(Deamidated)	41.08	2	2083.95	12.9995
LLFFDNYEHnTSVVK	High	6755408	N10(Deamidated)	40.99	2	1826.9	4.16812
LEQmTmNInLTGPLPAPYK	High	117647249	M4(Oxidation); M6(Oxidation); N9(Deamidated)	40.77	2	2165.08	15.4538
GmPNnFSEmPR	High	226874869	M2(Oxidation); N5(Deamidated); M9(Oxidation)	40.75	2	1312.53	1.94042
GIPDQKVnFTcK	High	294997315	N8(Deamidated); C11(Carbamidomethyl)	40.69	2	1407.7	0.976531
VnYSYTAVQIPTDIYK	High	291290989	N2(Deamidated)	40.61	2	1875.95	4.64155
YnGSLGLWR	High	356991139	N2(Deamidated)	40.6	2	1066.53	2.86748
ISTnITLVcKPGDLESAPVLR	High	133778978	N4(Deamidated); C9(Carbamidomethyl)	40.59	3	2284.23	3.37315
ELAAAAnESAVK	High	117168301	N7(Deamidated)	40.33	2	1174.6	2.1322
GVTHLnISGLK	High	124494256	N6(Deamidated)	40.32	2	1139.64	2.63043
VVAVSPAnISR	High	225690610	N8(Deamidated)	40.29	2	1113.63	1.28036
IFPSGnVTNILEmR	High	124248484	N6(Deamidated); M13(Oxidation)	40.28	2	1607.82	4.56145
FQnSSFHVNSETGTLVFNAVHK	High	12963613	N3(Deamidated)	40.28	3	2464.2	3.93654
LSSSPnVTIScK	High	111378397	N6(Deamidated); C11(Carbamidomethyl)	40.25	2	1293.64	2.07932
LKFnSTIK	High	444741657	N4(Deamidated)	40.13	2	951.553	1.8114
VLTLAnFTTKDEGDYFcELQVSGANPmSSnK	High	6678347	N6(Deamidated); C17(Carbamidomethyl); M27(Oxidation); N30(Deamidated)	40.04	3	3454.58	3.3868
AIATDTVAnmSSGPEPPFFK	High	9055168	N9(Deamidated); M10(Oxidation)	40.02	2	2097	5.61431
LnVTSPDLFR	High	124487155	N2(Deamidated)	39.9	2	1162.61	3.4303
TVVTEAGnLLKDnATQEEILHYLEK	High	225735655	N8(Deamidated); N13(Deamidated)	39.89	3	2831.47	19.373
IVDVnLTSEGK	High	19111162	N5(Deamidated)	39.86	2	1175.62	2.02289
EmLPFWmnSTGK	High	28893409	M2(Oxidation); M7(Oxidation); N8(Deamidated)	39.86	2	1473.64	3.40733
mTLSQnNSILR	High	85719313	M1(Oxidation); N6(Deamidated)	39.81	2	1293.65	2.54297
VnGTLTQVLLVGAPTHDDVSK	High	111378397	N2(Deamidated)	39.75	3	2165.15	3.69023
VETGEncTSPAPK	High	291327470	N6(Deamidated); C7(Carbamidomethyl)	39.69	2	1390.62	0.947484
VLGFKPKPPKnESLETYPLmmK	High	6753138	N11(Deamidated); M20(Oxidation); M21(Oxidation)	39.69	3	2580.35	2.19311
FLYnFTR	High	228008369	N4(Deamidated)	39.66	2	961.479	1.53757
EDNPDKNPEAPLnVSR	High	6755466	N13(Deamidated)	39.51	2	1795.85	1.95087
IIncTDPGHQENSVR	High	377837159	N3(Deamidated); C4(Carbamidomethyl)	39.38	2	1740.8	1.61477
LLNnLTSIK	High	153791270	N4(Deamidated)	39.21	2	1016.6	2.46464
LVLYLEHNLEKnSTK	High	225735655	N12(Deamidated)	39.19	2	1801.98	3.13431
FLEQQNQVLQTKWELLQQVnTSTR	High	51092293	N20(Deamidated)	39.1	3	2933.54	12.618
AnHSGAVVLLK	High	31982236	N2(Deamidated)	39.09	2	1109.63	1.76732
EETLLYDnATSSVADR	High	27370240	N8(Deamidated)	39.06	2	1784.82	1.97318
FAEInGSALcSYnIKPSEYTLTSK	High	227499988	N5(Deamidated); C10(Carbamidomethyl); N13(Deamidated)	39.02	3	2695.32	13.7111
VGVWSPADGLnITEVAK	High	124487364	N11(Deamidated)	39	2	1756.92	5.20039
nLTIVDSGLK	High	6679150	N1(Deamidated)	38.95	2	1060.59	3.25219
FVPNSNmnFTGQAYSGR	High	85719313	M7(Oxidation); N8(Deamidated)	38.92	2	1906.84	1.92181
ESHnTSKGPEATWNLNK	High	82546885	N4(Deamidated)	38.76	2	1913.9	2.67044
EQTVSDPFLVVSnTSTFVPYEIK	High	112293279	N13(Deamidated)	38.75	2	2602.31	11.1258
EAATSLSnPIEIDFQTSGPTFnASVHSDTPSVTR	High	50845420	N8(Deamidated); N22(Deamidated)	38.75	3	3578.72	10.8251
ENSKQnGSANSATNPAGLDK	High	16506279	N6(Deamidated)	38.7	2	2003.93	-0.363512
AFSTLLVnVSGK	High	28893491	N8(Deamidated)	38.67	2	1236.69	2.98708
nYTVVmSTR	High	282165729	N1(Deamidated); M6(Oxidation)	38.65	2	1087.51	0.416219
VLQPLSSTSLYVcGTNAFQPTcDHLnLTSFK	High	49274623	C13(Carbamidomethyl); C22(Carbamidomethyl); N26(Deamidated)	38.64	3	3501.69	9.76129
nNSNNFDLNR	High	150378501	N1(Deamidated)	38.59	2	1208.53	2.83071
TVVTEAGNLLKDnATQEEILHYLEK	High	225735655	N13(Deamidated)	38.58	3	2830.46	7.41468
FAVLAnnNLQILNInK	High	6754920	N6(Deamidated); N7(Deamidated); N15(Deamidated)	38.53	2	1802	14.4349
VHVnSSSDNLDYPVLVVVR	High	51036633	N4(Deamidated)	38.43	3	2113.1	1.33583
AnYSLQIYPDESHYFHSVALK	High	312032384	N2(Deamidated)	38.43	3	2483.2	4.8264
FFHVnGSAFLPR	High	58037273	N5(Deamidated)	38.42	2	1392.71	3.52243
YNQETPmEIcLnGTPALAYLASAPPPLcPSGR	High	7242181	M7(Oxidation); C10(Carbamidomethyl); N12(Deamidated); C28(Carbamidomethyl)	38.32	3	3505.66	5.56611
LVLIQDAPTLGnDTAAIEnR	High	164419755	N12(Deamidated); N19(Deamidated)	38.3	2	2126.1	1.05254
nVTLDcAQGTAK	High	112293269	N1(Deamidated); C6(Carbamidomethyl)	38.2	2	1278.6	1.17194
ESGAnVTGFQLVnYTDTIPAR	High	356991208	N5(Deamidated); N13(Deamidated)	38.15	2	2256.09	10.262
QnVSLSILK	High	294997259	N2(Deamidated)	38.14	2	1002.58	1.73262
SVAQnYSSITHLHSIGK	High	189458849	N5(Deamidated)	38.12	3	1842.94	2.60826
nLSVVILGASDKDLHPNTDPFK	High	110625609	N1(Deamidated)	38.12	3	2381.24	3.28467
FQLLnFSSSELK	High	71040107	N5(Deamidated)	38.09	2	1414.74	19.0953
SAVSTSWLLPYnHTWSHEK	High	19527008	N12(Deamidated)	38.05	3	2244.08	2.71463
VQEEQnVTSELIAK	High	117168301	N6(Deamidated)	37.97	2	1588.81	2.25256
HEEGPQSnSTAESELTTQK	High	134053919	N8(Deamidated)	37.95	2	2074.93	11.6627
SPGAQDnVSVSQGmR	High	148540116	N7(Deamidated); M14(Oxidation)	37.75	2	1549.7	3.00451
AnTTQPGIVEGGQVLK	High	154240716	N2(Deamidated)	37.7	2	1612.86	2.12929
VAWLnR	High	31982044;51092272;30425330;257096063	N5(Deamidated)	37.56	2	759.417	2.25727
INnDPDLLPnITLGAR	High	62945392	N3(Deamidated); N10(Deamidated)	37.43	2	1737.93	15.5572
DGQELHPLETTVNPSGKnVSYnISSTVR	High	294997315	N18(Deamidated); N22(Deamidated)	37.43	3	3044.49	3.38307
HYAnITnGmYR	High	227908835	N4(Deamidated); N7(Deamidated); M9(Oxidation)	37.4	2	1357.59	0.716203
EELGVVVHEAPYSGSFTIEGnnSFAQR	High	112293279	N21(Deamidated); N22(Deamidated)	37.14	3	2939.4	9.73401
SGGnATLQVDSWPVNER	High	327365337	N4(Deamidated)	36.88	2	1830.87	3.25315
VINFYAGAnQSmNVTcVGKR	High	7242138	N9(Deamidated); M12(Oxidation); C16(Carbamidomethyl)	36.78	3	2247.06	1.33833
ETWnnVTVWGSR	High	237858632;35215309	N4(Deamidated); N5(Deamidated)	36.75	2	1450.66	2.555
LSALDnLLnHSSIFLK	High	157951706	N6(Deamidated); N9(Deamidated)	36.68	2	1786.99	15.8091
INSDPTLLPnITLGcEIR	High	126116570	N10(Deamidated); C15(Carbamidomethyl)	36.61	2	2027.06	3.63191
FVPnSNmnFTGQAYSGR	High	85719313	N4(Deamidated); M7(Oxidation); N8(Deamidated)	36.55	2	1907.85	12.0264
LnQASFHTPPnVSVcDVNWEK	High	41282044	N2(Deamidated); N11(Deamidated); C15(Carbamidomethyl)	36.53	2	2444.14	10.6482
YLYLASnHSNK	High	6753066	N7(Deamidated)	36.42	2	1310.64	3.12203
TnYTLHVIEmK	High	356991208	N2(Deamidated); M10(Oxidation)	36.42	2	1365.68	3.03929
VHSGnFSTIPQYFK	High	84781812	N5(Deamidated)	36.35	2	1625.8	5.52334
GScVnNSEEKDVPK	High	34328113	C3(Carbamidomethyl); N5(Deamidated)	36.34	2	1563.7	3.5148
AnGTTHLVVTEPTR	High	117938277	N2(Deamidated)	36.32	2	1496.77	1.4854
FmLSGYnFSVmEnmPALSPVGmVTVIDGDKGENAR	High	34328319	M2(Oxidation); N7(Deamidated); M11(Oxidation); N13(Deamidated); M14(Oxidation); M22(Oxidation)	36.01	3	3842.73	-0.24617
QGPQAGGTTLTInGTHLDTGSK	High	226958476	N13(Deamidated)	35.9	3	2155.07	1.64216
AnASTFAVPSPVSNSADTR	High	31982223	N2(Deamidated)	35.89	2	1892.91	3.90093
EEEAIQLDGLnASQIR	High	6755863	N11(Deamidated)	35.88	2	1786.89	2.21194
VPFIFNINPATTnFTGScQPQSAQLR	High	31543108	N13(Deamidated); C18(Carbamidomethyl)	35.81	3	2909.44	5.424
DnTTcYEFKK	High	124494256	N2(Deamidated); C5(Carbamidomethyl)	35.76	2	1306.57	2.45058
STEGQSSLTVTnVTEEHYGnYTcVAAnK	High	30425330	N12(Deamidated); N20(Deamidated); C23(Carbamidomethyl); N27(Deamidated)	35.74	3	3064.38	18.5276
GSALHEDIYVLHDnGTLEIPVAQK	High	225637535	N14(Deamidated)	35.55	3	2621.34	10.4927
mYSEGSDIVPQSnETALHYFK	High	46309573	M1(Oxidation); N13(Deamidated)	35.51	2	2434.1	10.7949
LTFFnVSEHDYGnYTcVASNK	High	31982044	N5(Deamidated); N13(Deamidated); C16(Carbamidomethyl)	35.31	2	2468.05	-6.64985
LTnVTFPTGQVSSFR	High	124248484	N3(Deamidated)	35.23	2	1654.85	2.56738
nSTFGSVEVFSLDPNK	High	31542362	N1(Deamidated)	35.21	2	1741.84	5.63707
LTVPSSQnSSFR	High	183979966	N8(Deamidated)	35.2	2	1324.66	16.4981
ALSPnSTISSAPK	High	168693641	N5(Deamidated)	35.17	2	1273.67	1.64693
TmnFTYEVHLVADGK	High	294997259	M2(Oxidation); N3(Deamidated)	35.09	2	1741.82	4.06245
SWSTVGncTAALR	High	160358829	N7(Deamidated); C8(Carbamidomethyl)	35.03	2	1423.67	4.88628
DALQnmSSSLK	High	254675312	N5(Deamidated); M6(Oxidation)	34.94	2	1210.57	2.62757
TVYLYPnQTGLPDPLSK	High	116875858	N7(Deamidated)	34.91	2	1906.99	4.31851
VINFYAGANQSmnVTcVGKR	High	7242138	M12(Oxidation); N13(Deamidated); C16(Carbamidomethyl)	34.86	3	2246.08	4.60301
nSmTPGnLSPGIYLcnATNR	High	159110562	N1(Deamidated); M3(Oxidation); N7(Deamidated); C15(Carbamidomethyl); N16(Deamidated)	34.8	2	2199	16.181
ERPPTFLTPEGnESHKEELR	High	225637535	N12(Deamidated)	34.75	3	2367.17	5.41026
NPNnNTIHPNLR	High	225637487	N4(Deamidated)	34.61	2	1404.7	1.84363
IQATSLSGnGSWTDPVFFYVPAK	High	112983656	N9(Deamidated)	34.61	2	2486.24	4.61817
SnISILR	High	161760627	N2(Deamidated)	34.61	2	803.464	2.61828
SnLTVLR	High		N2(Deamidated)	34.61	2	803.464	2.61828
YnGSLTTPncDETVIWTVYK	High	6671678	N2(Deamidated); N9(Deamidated); C10(Carbamidomethyl)	34.46	2	2363.11	14.1189
TAADATGLQPILNQFTPAnVSR	High	154240716	N19(Deamidated)	34.35	2	2287.18	9.69983
VGVnKnQTVTATFGYPFR	High	41282044	N4(Deamidated); N6(Deamidated)	34.33	3	2001.03	11.7893
LTFYGnWSEK	High	21704174	N6(Deamidated)	34.3	2	1245.58	4.01295
nHSLAFVGTK	High	171543899	N1(Deamidated)	34.16	2	1074.56	3.32384
GAAAPSAPHWnETAEK	High	6752968	N11(Deamidated)	34.13	2	1637.76	4.56705
KnASSVVPSSVHnSANQR	High	281182810	N2(Deamidated); N13(Deamidated)	34.1	3	1883.93	2.73477
VSmGQnGDLYFAnVLTSDnHSDYIcnAHFPGTR	High	112293279	M3(Oxidation); N6(Deamidated); N13(Deamidated); N19(Deamidated); C25(Carbamidomethyl); N26(Deamidated)	34.1	4	3721.64	17.7117
LFnGQQGIIIQnFSTR	High	28893343	N3(Deamidated); N12(Deamidated)	34	2	1838.96	15.4737
KLVQVGIYnGTHVIPNDR	High	294997259	N9(Deamidated)	33.96	3	2024.1	3.2033
FVSnQTmYYSWEGnPInIScDVTAnPPASIHWR	High	6754920	N4(Deamidated); M7(Oxidation); N14(Deamidated); N17(Deamidated); C20(Carbamidomethyl); N25(Deamidated)	33.87	3	3875.75	17.7154
VVnSTTGPGEHLR	High	47059073	N3(Deamidated)	33.75	2	1367.69	1.89372
TnSSFIQGFVDHVKEDcDR	High	225735655	N2(Deamidated); C17(Carbamidomethyl)	33.7	3	2255.01	3.85267
DnATDSVPLR	High	124494256	N2(Deamidated)	33.64	2	1088.53	3.02867
SPLPAAFTAnGTHLQHLAR	High	225690610	N10(Deamidated)	33.63	3	2003.05	3.01325
LTVPSSQnSSFR	High	183979966	N8(Deamidated)	33.6	2	1323.66	2.68272
EELGVVVHEAPYSGSFTIEGnNSFAQR	High	112293279	N21(Deamidated)	33.59	3	2938.4	5.627
VSANIQnmTTADVIK	High	226052731	N7(Deamidated); M8(Oxidation)	33.56	2	1621.81	2.85152
TLSPTGnISSAPK	High	371121280	N7(Deamidated)	33.4	2	1273.67	1.45525
VEFDDKGNVITSYGNPILLnSSIPEDATIK	High	6754900	N20(Deamidated)	33.2	3	3250.67	10.441
IGTWDPSSGLnmTESQK	High	163659879	N11(Deamidated); M12(Oxidation)	33.09	2	1867.85	4.77933
GNPAAYGITVTNHPmnK	High	110225379	M15(Oxidation); N16(Deamidated)	33.05	2	1801.86	2.15406
ILYGLEnTTQELK	High	117647249	N7(Deamidated)	33.03	2	1522.81	3.45158
VGVnKnQTVTATFGYPFR	High	41282044	N4(Deamidated); N6(Deamidated)	33.02	2	2002.01	8.9819
DDLDPERnESEPGSQR	High	161086902	N8(Deamidated)	32.87	3	1844.79	1.19352
ATQLFTnQTDIPNmEDVYAVK	High	9938002	N7(Deamidated); M14(Oxidation)	32.82	2	2416.16	13.9682
STEGQSSLTVTnVTEEHYGnYTcVAANK	High	30425330	N12(Deamidated); N20(Deamidated); C23(Carbamidomethyl)	32.64	3	3063.38	12.9174
LSYnHTnETLGLDSR	High	160707923	N4(Deamidated); N7(Deamidated)	32.63	2	1721.81	4.56282
FVSQTnGnLYIAnVESSDRGnYScFVSSPSITK	High	227497226	N6(Deamidated); N8(Deamidated); N13(Deamidated); N21(Deamidated); C24(Carbamidomethyl)	32.59	3	3646.71	19.93
AAEQIAGSFVYSIPFSTGTVnK	High	6753236	N21(Deamidated)	32.46	2	2288.16	5.8603
YFAncTVR	High	21312084	N4(Deamidated); C5(Carbamidomethyl)	32.45	2	1031.46	1.25536
GVnVTmPSQPGVPPLSSTQLQIDPALQEFQLVDLSR	High	183979966	N3(Deamidated); M6(Oxidation)	32.42	3	3879	3.57721
VELVPLPSWQPVGEnFTLScR	High	159110562	N15(Deamidated); C20(Carbamidomethyl)	32.29	2	2430.23	12.0091
RPASnISASIQR	High	148747408	N5(Deamidated)	32.23	3	1300.7	1.59138
VSPDHQPQPQYVSYnQSSYTQWNLQPDTK	High	112293279	N15(Deamidated)	32.19	3	3437.58	8.20756
SYDnITGQSIVGcK	High	21450363	N4(Deamidated); C13(Carbamidomethyl)	32	2	1542.72	4.03256
GDLNInmTSPmGTK	High	6679229	N6(Deamidated); M7(Oxidation); M11(Oxidation)	31.98	2	1511.68	2.64573
DVGSGTTnnSQAcAQFLEQYFHNSDLTEFmR	High	6753448	N8(Deamidated); N9(Deamidated); C13(Carbamidomethyl); M30(Oxidation)	31.94	3	3587.54	15.0045
TnETQTYWGGSLPVHQK	High	31982591	N2(Deamidated)	31.82	3	1946.93	3.2985
LNGVnVTYSPGGHIAGIQR	High	124248484	N5(Deamidated)	31.69	3	1954.01	-0.17871
DLDTDFTSnASQPETK	High	150378501	N9(Deamidated)	31.65	2	1769.77	0.977254
RVnYTmDVFELK	High	164419755	N3(Deamidated); M6(Oxidation)	31.6	2	1531.75	3.56599
LnYSLPTGQSmEVQLPK	High	126722834	N2(Deamidated); M11(Oxidation)	31.46	2	1921.96	1.61744
LHVAQPEnDSHVALLK	High	254028203	N8(Deamidated)	31.27	3	1771.94	2.66003
FYHITVSSSQPnSSnDNIQSITSGDWDVTK	High	312032384	N12(Deamidated); N15(Deamidated)	31.25	3	3330.55	16.4907
SInLTLDR	High	165377150	N3(Deamidated)	31.25	2	932.506	0.884175
AnDTREEAGLPAAGEDETSWTER	High	261878591	N2(Deamidated)	31.13	3	2506.11	5.70473
SVDFNRGTDnITVR	High	30425330	N10(Deamidated)	31.12	2	1594.79	3.96941
LDPVSLQILQTWnTSYPK	High	84370353	N13(Deamidated)	31.03	2	2105.12	16.905
LDPPcTnTTAPSNYLNnPYVR	High	84042523	C5(Carbamidomethyl); N7(Deamidated); N17(Deamidated)	31.01	2	2409.13	11.9761
RInYTINImELK	High	85861220	N3(Deamidated); M9(Oxidation)	30.94	2	1524.81	1.45893
VAFVLYNnLGPYLSTEnASmK	High	58037543	N8(Deamidated); N17(Deamidated); M20(Oxidation)	30.86	2	2349.15	8.68954
nGTVAVVEPEcEK	High	26986569	N1(Deamidated); C11(Carbamidomethyl)	30.7	2	1432.66	0.945552
VYnGSVPFEER	High	153792211	N3(Deamidated)	30.65	2	1297.61	3.04682
SLQDAATQLNTnLSSVR	High	254675312	N12(Deamidated)	30.62	2	1818.93	3.54026
SnPEPSVAFELPSRnVTVnETER	High	6754614	N2(Deamidated); N15(Deamidated); N19(Deamidated)	30.6	2	2575.25	12.7668
AmYVnLTLTGEPIR	High	124301217	M2(Oxidation); N5(Deamidated)	30.47	2	1594.82	2.92771
ANQIVIPHnTTFQTEPTK	High	153791389	N9(Deamidated)	30.38	3	2040.05	2.86713
GEGnETnNmVITWKPLR	High	112293279	N4(Deamidated); N7(Deamidated); M9(Oxidation)	30.37	3	1976.91	-12.7154
RGDLNInmTSPmGTK	High	6679229	N7(Deamidated); M8(Oxidation); M12(Oxidation)	30.21	2	1667.78	1.93148
FGAmLGnYScAAQGTQGGSK	High	114050897	M4(Oxidation); N7(Deamidated); C10(Carbamidomethyl)	30.17	2	2021.89	8.00108
nVTVVLR	High	113195678	N1(Deamidated)	30.14	2	801.484	1.57353
VVRPDSELGERPPEDnQSFQYDHEAFLGK	High	6677691	N16(Deamidated)	30.13	4	3360.59	2.80818
VnASTTDPNSTVEQSALTR	High	114326497	N2(Deamidated)	30.11	2	1991.94	-3.61039
TTLVDNNTWnNSHIALVGK	High	61651673	N10(Deamidated)	30.06	3	2098.06	3.6914
VEHVTFnFTLENQIHR	High	11528518	N7(Deamidated)	30.05	3	1984.99	2.65781
AEAVGETLTLPGLVSADnGTYTcEAANK	High	23346547	N18(Deamidated); C23(Carbamidomethyl)	29.97	3	2853.35	1.94309
YnAQPVGnWSDcILPEGK	High	259013354	N2(Deamidated); N8(Deamidated); C12(Carbamidomethyl)	29.93	2	2049.95	13.6226
ALVTLEGIPAAVPGQPAELQLnVTK	High	159110562	N22(Deamidated)	29.91	3	2531.42	9.11018
GcmESInYnGVnITDLAR	High	165377150	C2(Carbamidomethyl); M3(Oxidation); N7(Deamidated); N9(Deamidated); N12(Deamidated)	29.59	2	2045.91	13.096
GNPKPALQWFYnGAILnESK	High	6679150	N12(Deamidated); N17(Deamidated)	29.56	3	2249.13	3.58662
InVSYTGERPSSNmVIVDVK	High	110347469	N2(Deamidated); M14(Oxidation)	29.54	3	2225.12	1.47641
VLKDAVnnITAK	High	161086902	N7(Deamidated); N8(Deamidated)	29.51	2	1287.74	18.6577
FSELIVnnATEELLVK	High	225735655	N7(Deamidated); N8(Deamidated)	29.43	2	1820.97	12.0297
IVnGSHYEYK	High	161086986	N3(Deamidated)	29.41	2	1210.58	2.42242
RTnYTLHVIEmK	High	356991208	N3(Deamidated); M11(Oxidation)	29.3	3	1521.78	1.92656
RGPEcSQnYTAPTGVIK	High	244792700	C5(Carbamidomethyl); N8(Deamidated)	29.3	2	1878.9	1.70279
LRnESSWHSGDPQAR	High	66793406	N3(Deamidated)	29.21	3	1740.81	2.31259
mSATFIGnSTAIQELFK	High	33859488	M1(Oxidation); N8(Deamidated)	29.08	2	1874.94	8.68449
nVTELNEPLSNEER	High	31543976	N1(Deamidated)	28.99	2	1644.8	14.8922
DLIPPHVnFSHLTTK	High	26986569	N8(Deamidated)	28.89	3	1719.91	3.20607
EVmNLLQPLnVTK	High	148232950	M3(Oxidation); N10(Deamidated)	28.7	2	1515.82	4.17516
LKGEAEYQEIRNPnGTVTVISR	High	40254534	N14(Deamidated)	28.64	3	2475.3	6.39093
SLTQGSLIVGNLAPVnGTSQGK	High	183979966	N16(Deamidated)	28.32	2	2142.15	5.58313
FLEQQNQVLQTKWELLQQVnTSTR	High	51092293	N20(Deamidated)	28.29	3	2934.54	19.1629
SQTnLTDcPFHDQPHLmR	High	31981822	N4(Deamidated); C8(Carbamidomethyl); M17(Oxidation)	28.28	3	2213.97	1.4723
VVncSDPGIPANSK	High	161086986	N3(Deamidated); C4(Carbamidomethyl)	28.26	2	1458.69	1.49766
ISTDGSnYTLLK	High	153792247	N7(Deamidated)	28.23	2	1312.67	2.51559
InGSAVIDSScVPVNK	High	203099104	N2(Deamidated); C11(Carbamidomethyl)	28.02	2	1660.82	1.58763
AnASEGTFPncTGHcTHPR	High	116063560	N2(Deamidated); N10(Deamidated); C11(Carbamidomethyl); C15(Carbamidomethyl)	27.99	3	2115.87	2.23141
ILDQAcGTDnQTYASScHLFATK	High	227330561	C6(Carbamidomethyl); N10(Deamidated); C17(Carbamidomethyl)	27.95	3	2602.16	1.30008
mGHnYTFTVQAR	High	110625645	M1(Oxidation); N4(Deamidated)	27.68	2	1441.66	4.79679
mYTLEQYnNSK	High	30425288	M1(Oxidation); N8(Deamidated)	27.55	2	1407.61	3.35687
IVASDSGKPSLnQTALVR	High	422744224	N12(Deamidated)	27.53	2	1858.02	12.8897
GTGTGIEnSTESHFHSnGTTSVTSILR	High	111955312	N8(Deamidated); N17(Deamidated)	27.43	3	2792.3	2.62226
APLmPWnESSIFHIPRPVSLnmTVK	High	238637279	M4(Oxidation); N7(Deamidated); N21(Deamidated); M22(Oxidation)	27.3	3	2898.46	1.068
FLSYnVTR	High	27369505	N5(Deamidated)	27.24	2	1000.51	4.0532
mLSAFnATSGK	High	31560063	M1(Oxidation); N6(Deamidated)	27.05	1	1143.54	3.13413
SYNPnDTcPAScAK	High	13384722	N5(Deamidated); C8(Carbamidomethyl); C12(Carbamidomethyl)	26.99	2	1585.63	1.30542
WAnITWK	High	35215309	N3(Deamidated)	26.95	2	919.469	1.66433
SILTVTNVTQEHFGnYTcVAANK	High	28893343	N15(Deamidated); C18(Carbamidomethyl)	26.93	3	2569.23	2.51615
DHGSPTLSAnVSmR	High	18087737	N10(Deamidated); M13(Oxidation)	26.88	2	1488.68	1.91956
AnYSLQIYPDESHYFHSVALK	High	312032384	N2(Deamidated)	26.75	2	2484.19	7.40678
AVcmLSnTTAIAEAWAR	High	6755901;6678467	C3(Carbamidomethyl); M4(Oxidation); N7(Deamidated)	26.74	2	1881.91	14.2832
LnLTTDPK	High	6677905	N2(Deamidated)	26.71	2	902.484	0.857536
LTVnSSNSIK	High	110347545	N4(Deamidated)	26.6	2	1063.56	0.591344
IQTLQAPPDIAPAnVTLR	High	40254254	N14(Deamidated)	26.56	2	1919.07	4.32161
AREPSnATQLDGPAR	High	6753150	N6(Deamidated)	26.44	2	1583.78	2.05703
IQDFnYTDHTLGR	High	124487263	N5(Deamidated)	26.42	2	1581.73	10.1364
LVTQTIPcnK	High	31542362	C8(Carbamidomethyl); N9(Deamidated)	26.36	2	1174.62	2.19411
VPIQSnETLLGAVInnVSEAmETLTR	High	24233554	N6(Deamidated); N15(Deamidated); N16(Deamidated); M21(Oxidation)	25.97	3	2818.41	3.29909
nGTHFDIDKDPLVTmKPGSGTLVINImSEGK	High	225637535	N1(Deamidated); M15(Oxidation); M27(Oxidation)	25.94	3	3347.67	7.08906
ELGVVmYncScLAR	High	7242181	M6(Oxidation); N8(Deamidated); C9(Carbamidomethyl); C11(Carbamidomethyl)	25.92	2	1688.75	2.69698
ESGLnmTLPEENQPVVFNHIYNIK	High	126722834	N5(Deamidated); M6(Oxidation)	25.91	3	2803.37	3.71612
YPNQVYYRPVDQYSNQnnFVHDcVnITIK	High	506326231	N17(Deamidated); N18(Deamidated); C23(Carbamidomethyl); N25(Deamidated)	25.58	3	3591.69	12.7254
TILVDNNTWnnTHISR	High	148747128	N10(Deamidated); N11(Deamidated)	25.53	3	1899.95	13.9403
NGGnATLQVDNWPVNEHYPTGNTDNER	High	355390246	N4(Deamidated)	25.45	3	3014.33	4.66713
LLFFDnYEHnTSVVK	High	6755408	N6(Deamidated); N10(Deamidated)	25.43	2	1827.91	14.3127
KDTcAQEcSHFnLTK	High	45504394	C4(Carbamidomethyl); C8(Carbamidomethyl); N12(Deamidated)	25.41	3	1839.81	2.72451
DSLmPLWWnGSEPLWITLmK	High	28893409	M4(Oxidation); N9(Deamidated); M19(Oxidation)	25.37	3	2450.18	2.42526
SNPEPSVAFELPSRnVTVnETER	High	6754614	N15(Deamidated); N19(Deamidated)	25.33	3	2574.24	4.21004
GnPKPALQWFYnGAILnESK	High	6679150	N2(Deamidated); N12(Deamidated); N17(Deamidated)	25.23	2	2250.14	14.8176
YQTLncSVNVR	High	31982236	N5(Deamidated); C6(Carbamidomethyl)	25.15	2	1354.64	1.08436
VEFDDKGNVITSYGnPILLnSSIPEDATIK	High	6754900	N15(Deamidated); N20(Deamidated)	25.09	3	3251.67	16.2919
IGSYnGTAGDSLSYHQGRPFSTEDR	High	226958549	N5(Deamidated)	25.03	3	2717.23	6.80952
mALcTNnISDFTVK	High	110625972	M1(Oxidation); C4(Carbamidomethyl); N7(Deamidated)	25.03	2	1630.76	7.31646
KFEAENISnYTALLLSQDGK	High	110625636	N9(Deamidated)	24.9	3	2242.13	0.987656
ISTLTFFnVSEKDYGnYTcVATNK	High	51092272	N8(Deamidated); N16(Deamidated); C19(Carbamidomethyl)	24.87	3	2774.3	3.81251
TcPAGImGEnNTLVWK	High	6681283	C2(Carbamidomethyl); M7(Oxidation); N10(Deamidated)	24.84	2	1807.85	5.37329
ESLLPVTLQcnLTSSSHTLmYSYWTR	High	153945724	C10(Carbamidomethyl); N11(Deamidated); M20(Oxidation)	24.84	3	3104.48	3.41955
WnRGnESLPER	High	23346547	N2(Deamidated); N5(Deamidated)	24.75	3	1359.65	16.2393
mAVcTDnVTDLR	High	85701810	M1(Oxidation); C4(Carbamidomethyl); N7(Deamidated)	24.67	2	1411.62	1.84715
SLEEIGIQnYSTTSScQAR	High	172088121	N9(Deamidated); C16(Carbamidomethyl)	24.61	2	2145.98	11.0165
IGAISnSSNGnKNPAK	High	331284197	N6(Deamidated); N11(Deamidated)	24.47	2	1573.79	2.60576
InFTAPFNPnK	High	32469489	N2(Deamidated); N10(Deamidated)	24.4	2	1264.63	6.1887
HESEVnVTIR	High	124249105	N6(Deamidated)	24.33	2	1184.59	2.77088
FLEQQNQVLQTKWELLQQVnTSTR	High	51092293	N20(Deamidated)	24.29	3	2932.53	3.07158
WDPVVPLRnESTVTGYK	High	54607084	N9(Deamidated)	24.24	2	1962	4.02087
VPPnSTSNILNR	High	31981754	N4(Deamidated)	24.19	2	1312.69	3.15197
VnLSFPSAQSLPASDTHLK	High	110347469	N2(Deamidated)	24.09	3	2013.04	4.58598
ALYDYAPISmHcnK	High	110815861	M10(Oxidation); C12(Carbamidomethyl); N13(Deamidated)	23.98	2	1699.76	7.33979
TcNPETFPLRnESLQcPTAR	High	312596932	C2(Carbamidomethyl); N11(Deamidated); C16(Carbamidomethyl)	23.74	3	2392.11	3.58913
IWnVTR	High	12963613	N3(Deamidated)	23.74	2	789.427	1.93834
nNTIPDSQmSASSSYK	High	113865977	N1(Deamidated); M9(Oxidation)	23.61	2	1746.75	2.84379
TDDEVVQREEEAIQLDGLnASQIR	High	6755863	N19(Deamidated)	23.47	3	2729.33	4.40054
SDVGnYTcVVTNTVTNHK	High	157909807	N5(Deamidated); C8(Carbamidomethyl)	23.45	2	2009.93	5.484
VmHGGAnITGFQIVNNENPmVQQFIQR	High	163792196	M2(Oxidation); N7(Deamidated); M20(Oxidation)	23.43	3	3076.49	10.6669
NLnFSTR	High	225637535	N3(Deamidated)	23.42	2	852.422	1.11017
GNYDFVEAmIVNnHTSLDVER	High	30520239	M9(Oxidation); N13(Deamidated)	23.34	3	2440.12	4.44554
FSELIVNnATEELLVK	High	225735655	N8(Deamidated)	22.8	2	1819.98	6.60735
FSIPPTNHEImPGGSVnITcVAVGSPmPYVK	High	90403603	M11(Oxidation); N17(Deamidated); C20(Carbamidomethyl); M27(Oxidation)	22.73	3	3332.61	2.72602
KGFcEADnSTVSEnnPEDWPVNTEGcmEK	High	407228369	C4(Carbamidomethyl); N8(Deamidated); N14(Deamidated); N15(Deamidated); C26(Carbamidomethyl); M27(Oxidation)	22.72	3	3363.38	15.0346
nVTLQDYGR	High	29244530	N1(Deamidated)	22.71	2	1066.52	1.26626
TnQSAELIQPVATnGK	High	27370240	N2(Deamidated); N14(Deamidated)	22.58	2	1673.85	15.2505
LHVAQPEnDSHVALLK	High	254028203	N8(Deamidated)	22.57	2	1772.94	12.7833
TVnSLnVSAISIPEHDEADDISDENR	High	31791059	N3(Deamidated); N6(Deamidated)	22.4	3	2842.32	12.0055
LVPLGVFTGLSnLTK	High	260269246	N12(Deamidated)	22.38	2	1559.91	3.95712
DSTHIIPGDNPFnSSLVSLIR	High	154090989	N13(Deamidated)	22.32	3	2283.17	2.89061
VnNSSLIGVGYTQTLRPGVK	High	6755965	N2(Deamidated)	22.19	3	2104.16	11.0646
LEnITTGTYTIHAQK	High	227908803	N3(Deamidated)	22.14	2	1691.87	13.8395
nGGnATLQVDnWPVNEHYPTGNTDNER	High	355390246	N1(Deamidated); N4(Deamidated); N11(Deamidated)	22.14	3	3016.33	16.9216
SPQSnGTSGVEQIcVDVR	High	295789082	N5(Deamidated); C14(Carbamidomethyl)	22.14	3	1934.9	11.7844
DLAVGDDYTnR	High	7305189	N10(Deamidated)	21.95	2	1239.55	3.37929
LVAnESVPFETScR	High	31981299	N4(Deamidated); C13(Carbamidomethyl)	21.91	2	1609.76	3.49561
ILIWEDGSLEInnITR	High	227497226	N12(Deamidated); N13(Deamidated)	21.79	2	1888	13.6927
LSHDGnETLPLHLYVK	High	226958476	N6(Deamidated)	21.75	3	1836.95	2.84249
EmLPFWmnSTGKR	High	28893409	M2(Oxidation); M7(Oxidation); N8(Deamidated)	21.53	3	1629.74	2.59522
mTQESALIFPFLnK	High	16716503	M1(Oxidation); N13(Deamidated)	21.53	2	1656.84	14.2926
GAAHSAEPGRDTIPGDPSSnATSR	High	6681281	N20(Deamidated)	21.33	3	2352.09	1.6708
nLTScPDGAPFIQHGPDYR	High	6680744	N1(Deamidated); C5(Carbamidomethyl)	21.31	3	2145.97	1.50937
AnYNLPImVTDSGKPPmTnITDLR	High	110625609	N2(Deamidated); M8(Oxidation); M17(Oxidation); N19(Deamidated)	21.23	2	2695.34	14.7586
EAIPQFSAAQKPLLSLEETLnVTER	High	157952224	N21(Deamidated)	21.14	3	2785.47	3.9883
WSYnnSETSR	High	61656194	N4(Deamidated); N5(Deamidated)	21.12	2	1245.51	2.65856
DmSQSIPIEDmLLQVSHYLnNSNR	High	254675312	M2(Oxidation); M11(Oxidation); N20(Deamidated)	20.98	3	2837.31	1.63218
VQLENQVHGVHFnITAIcPDGAR	High	124249086	N13(Deamidated); C18(Carbamidomethyl)	20.97	3	2576.28	5.61867
TnLTTFNPSILEK	High	50053988	N2(Deamidated)	20.95	2	1478.78	3.94333
DSTHIIPGDnPFnSSLVSLIR	High	154090989	N10(Deamidated); N13(Deamidated)	20.94	3	2284.17	10.181
nILPTmnGScTFHK	High	84781762	N1(Deamidated); M6(Oxidation); N7(Deamidated); C10(Carbamidomethyl)	20.82	2	1637.75	13.586
nVnFnGSAGTPVmFNK	High	60460877	N1(Deamidated); N3(Deamidated); N5(Deamidated); M13(Oxidation)	20.54	2	1715.75	-5.47132
NcnLTQIGGLIDSK	High	163659879;124487364	C2(Carbamidomethyl); N3(Deamidated)	20.47	2	1533.76	3.06271
DADEGDTLAnSSDLLK	High	50950119	N10(Deamidated)	20.4	2	1664.75	2.55811
VKGSQGQFPLTQnVTVVEGGTAILTcR	High	225543375	N13(Deamidated); C26(Carbamidomethyl)	20.33	3	2863.5	16.812
VTnLSDPVVLTFQHQPQPK	High	312032400	N3(Deamidated)	20.33	2	2150.14	12.6927
GILnATLSVAEInHPVTTYK	High	150378501	N4(Deamidated); N13(Deamidated)	20.29	3	2143.16	13.7006
YSVQHmYFTYnLSDTEHFPNAISK	High	113195678	M6(Oxidation); N11(Deamidated)	20.27	3	2909.32	4.09014
VSHnASVDmcDLK	High	312032400	N4(Deamidated); M9(Oxidation); C10(Carbamidomethyl)	20.11	2	1492.64	1.92677
LTVQETQLGGSAnLTcR	High	237874261	N13(Deamidated); C16(Carbamidomethyl)	20.06	2	1849.93	17.8534
IPFnLSEWQK	High	158533990	N4(Deamidated)	19.99	2	1263.65	19.533
DEGDYFcELQVSGANPmSSnK	High	6678347	C7(Carbamidomethyl); M17(Oxidation); N20(Deamidated)	19.91	2	2365.97	12.816
DSGYYncTATnNVGNPAK	High	124487209	N6(Deamidated); C7(Carbamidomethyl); N11(Deamidated)	19.81	2	1947.81	4.93584
AAPYWIVAPQNLVLSPGEnGTLIcR	High	225637535	N19(Deamidated); C24(Carbamidomethyl)	19.8	3	2741.43	12.8859
LDPTVLDASELAnR	High	146231960	N13(Deamidated)	19.8	2	1514.77	0.768646
VLSQHHAAAQPWInQTIPR	High	167900456	N14(Deamidated)	19.71	3	2168.14	1.88297
SISnmTSQEFVEK	High	131888529	N4(Deamidated); M5(Oxidation)	19.71	2	1517.69	14.1572
LFALNnTTGLITVQR	High	422744224	N6(Deamidated)	19.7	2	1661.93	3.74566
ITYVEnQTAmELEEQVTLTcEASGDPIPSITWR	High	124517683	N6(Deamidated); M10(Oxidation); C20(Carbamidomethyl)	19.7	3	3798.79	3.77334
AmnISASSmTLTWK	High	208609941	M2(Oxidation); N3(Deamidated); M9(Oxidation)	19.65	2	1573.74	8.8065
YQAQnFTLVcIVSGGKPAPmVYFK	High	38348466	N5(Deamidated); C10(Carbamidomethyl); M20(Oxidation)	19.63	3	2736.37	9.5687
FIHGGAnVTGFQLVDFNTPmVTK	High	164419755	N7(Deamidated); M20(Oxidation)	19.62	3	2510.25	4.84543
AYnSAGAGPFSATVnATTK	High	117938277	N3(Deamidated); N15(Deamidated)	19.6	2	1829.89	17.5439
ncSEPYcPLGcSSR	High	226958549	N1(Deamidated); C2(Carbamidomethyl); C7(Carbamidomethyl); C11(Carbamidomethyl)	19.39	2	1687.65	2.22284
TLFIFPQmnLSGTAESLNTVPITEYK	High	124486807	M8(Oxidation); N9(Deamidated)	19.38	3	2931.48	4.78101
IFNIHSGnGSLYTSKPLDR	High	124249202	N8(Deamidated)	19.35	3	2120.08	2.9149
ISDTnITAIPQGLPTSLTEVHLDGNK	High	299758443	N5(Deamidated)	19.24	3	2735.43	7.3365
VQQVGHYPPAnSSLASR	High	88196788	N11(Deamidated)	19.16	3	1812.91	13.9961
YPQDYQFYIQnFTALPLNTVVPPQR	High	165377206	N11(Deamidated)	19.15	3	3013.52	3.45586
EKLLLPAKnTTHLK	High	6754920	N9(Deamidated)	19.15	2	1606.95	1.03052
GVFITnETGQPLIGK	High	226693369	N6(Deamidated)	18.94	2	1574.85	2.97697
YVPFnGTK	High	237858632;35215309	N5(Deamidated)	18.93	1	926.466	5.02383
mAVTFIGnSTAIQELFK	High	7106439	M1(Oxidation); N8(Deamidated)	18.77	2	1886.99	15.4146
AVISmLnETMnEAPEETK	High	7106409	M5(Oxidation); N7(Deamidated); N11(Deamidated)	18.68	2	2024.93	11.2731
TEQLIIQAPnTSVHIYEPYPAGADVPFGPPLnK	High	89242146	N10(Deamidated); N32(Deamidated)	18.67	3	3579.84	13.101
LRPLFnK	High	14916479	N6(Deamidated)	18.65	2	888.532	2.53223
VQEVLnGTEVNLQHLTALVDcR	High	254588052	N6(Deamidated); C21(Carbamidomethyl)	18.63	3	2509.28	3.87517
FGTVPnGSTER	High	117168299;41680705	N6(Deamidated)	18.58	2	1165.55	2.14801
VDHESLnATPQVAmQVLEIHYTPSVK	High	225543375	N7(Deamidated); M14(Oxidation)	18.52	3	2924.47	11.2069
KcLAnGSWTDmDTPSR	High	131888529	C2(Carbamidomethyl); N5(Deamidated); M11(Oxidation)	18.33	2	1855.8	3.39521
TmVFPVmYLnESVLIDKETAnQLK	High	6680878	M2(Oxidation); M7(Oxidation); N10(Deamidated); N21(Deamidated)	18.23	3	2817.41	6.77311
ERVEnTSQPGEmQVTIQNLmPATVYIFK	High	112363084	N5(Deamidated); M12(Oxidation); M20(Oxidation)	18.22	3	3256.6	4.21532
nTDGTYnYTSLFLVnSSAHR	High	294997315	N1(Deamidated); N7(Deamidated); N15(Deamidated)	18.17	3	2263.02	3.1235
KLVQVGIYnGTHVIPNDR	High	294997259	N9(Deamidated)	18.07	3	2025.11	15.1333
VQEVLnGTEVNLQHLTALVDcR	High	254588052	N6(Deamidated); C21(Carbamidomethyl)	18.05	3	2510.29	12.9156
KPPPSQPPGNIIWnSSDSK	High	157909807	N14(Deamidated)	17.96	3	2050.03	0.533328
NLRPQDYAnYScIASVR	High	514961954	N9(Deamidated); C12(Carbamidomethyl)	17.83	3	2027.97	2.98502
WGcHSnQTAFHGcmELLK	High	116063560	C3(Carbamidomethyl); N6(Deamidated); C13(Carbamidomethyl); M14(Oxidation)	17.77	3	2192.94	2.25224
FHVnYTQPLVAVK	High	7242138	N4(Deamidated)	17.68	2	1517.8	3.26384
LEDGFHPDAVAWAnLTNAIR	High	31560090	N14(Deamidated)	17.54	3	2211.09	4.75905
GnYTcVVENK	High	254028252	N2(Deamidated); C5(Carbamidomethyl)	17.39	2	1184.53	2.32194
LNPGnYTAR	High	112983656	N5(Deamidated)	17.37	2	1006.5	0.747125
VnLSFPSAQSLPASDTHLK	High	110347469	N2(Deamidated)	17.33	3	2014.04	12.9443
LWnSTFLEEYSK	High	31982236	N3(Deamidated)	17.3	2	1517.72	5.44987
SVDFnRGTDnITVR	High	30425330	N5(Deamidated); N10(Deamidated)	17.18	2	1595.77	0.826112
SGGnATLQVDSWPVNER	High	327365337	N4(Deamidated)	17.12	2	1831.87	15.442
EQLFFnLSDPELR	High	112293279	N6(Deamidated)	17.1	2	1609.77	0.0499645
VFnTSEDLSR	High	117168301	N3(Deamidated)	17.1	2	1168.55	3.06023
nGGnATLQVDNWPVNEHYPTGNTDNER	High	355390246	N1(Deamidated); N4(Deamidated)	17.05	3	3015.33	9.15684
ETQEnLTVYSFPTPLLTLSEPEAPEGK	High	159110562	N5(Deamidated)	17.03	3	2991.49	5.50038
NILPTmnGScTFHK	High	84781762	M6(Oxidation); N7(Deamidated); C10(Carbamidomethyl)	17.03	2	1636.75	2.78449
ITNWmPDSmnFSDVK	High	28565287	M5(Oxidation); M9(Oxidation); N10(Deamidated)	16.86	2	1817.78	3.01367
GTnESEASSTQFTTEIDAPK	High	226958549	N3(Deamidated)	16.76	2	2114.96	14.9919
ITYVEnQTAmELEEQVTLTcEASGDPIPSITWR	High	124517683	N6(Deamidated); M10(Oxidation); C20(Carbamidomethyl)	16.75	3	3799.82	17.8413
nQSVPLSccR	High	254281189	N1(Deamidated); C8(Carbamidomethyl); C9(Carbamidomethyl)	16.75	2	1221.54	1.3716
SGQEDHYWLDVEKnQSAK	High	225637487	N14(Deamidated)	16.75	3	2135.97	10.2588
QQLPNVPQSLPSYTALLDLSHNnLSR	High	51988881	N23(Deamidated)	16.73	3	2909.45	-1.61957
TPASDPHGDnLTYSVFYTK	High	112363084	N10(Deamidated)	16.49	3	2113.98	3.26271
VPGADTQYFVYSnDSIHPYTPFEVK	High	54607084	N13(Deamidated)	16.4	3	2876.37	14.3093
FnHTcLTFTTR	High	62990174	N2(Deamidated); C5(Carbamidomethyl)	16.39	2	1398.65	2.29854
VnmSEDcPQILPSTHIYVPVGVVKPITLAAR	High	6679389	N2(Deamidated); M3(Oxidation); C7(Carbamidomethyl)	16.25	3	3422.81	11.1301
GFFcDAALDVDGETLRKnQSSELR	High	159110562	C4(Carbamidomethyl); N18(Deamidated)	16.24	3	2729.3	5.43171
VVLGEnLTSncPEVIYEIK	High	9055376	N6(Deamidated); N10(Deamidated); C11(Carbamidomethyl)	16.18	2	2179.12	17.6194
LEPnSVDPEnITEILIAnQK	High	6679150	N4(Deamidated); N10(Deamidated); N18(Deamidated)	16.11	2	2240.14	10.7217
ERVEnTSQPGEmQVTIQNLmPATVYIFK	High	112363084	N5(Deamidated); M12(Oxidation); M20(Oxidation)	16.04	3	3257.61	10.732
SSWHLSNLnSTTK	High	110347545	N9(Deamidated)	15.64	2	1475.72	3.24958
GYLTSFEmFnSTFK	High	71061462	M8(Oxidation); N10(Deamidated)	15.62	2	1688.76	4.23871
LnKFLEPYnDSIQAQK	High	7242138	N2(Deamidated); N9(Deamidated)	15.57	3	1909.98	14.3825
SILTVTnVTQEHFGNYTcVAAnK	High	28893343	N7(Deamidated); C18(Carbamidomethyl); N22(Deamidated)	15.48	3	2570.24	11.4174
LQNSQcYnWTLLLGNR	High	85677501	C6(Carbamidomethyl); N8(Deamidated)	15.31	2	1980.96	2.07546
VnSSLHSQISR	High	153791270	N2(Deamidated)	15.3	2	1229.63	17.9806
KFHVnYTQPLVAVK	High	7242138	N5(Deamidated)	15.25	2	1645.92	13.8384
TEQLIIQAPnTSVHIYEPYPAGADVPFGPPLNK	High	89242146	N10(Deamidated)	15.18	3	3577.85	7.07341
VInFYAGANQSmnVTcVGKR	High	7242138	N3(Deamidated); M12(Oxidation); N13(Deamidated); C16(Carbamidomethyl)	15.16	3	2248.06	10.6199
TmVFPVmYLnESVLIDKETANQLK	High	6680878	M2(Oxidation); M7(Oxidation); N10(Deamidated)	15.11	3	2816.42	2.74722
GLLTFVDHLPVTQVVVGDTnR	High	116063560	N20(Deamidated)	14.92	3	2282.23	10.9647
VFVYTPTTnYTLR	High	19527008	N9(Deamidated)	14.63	2	1575.81	3.3946
ILSQAPSTPSPNmFTINnETGDIITVAAGLDR	High	161760627	M13(Oxidation); N18(Deamidated)	14.6	3	3361.67	7.25875
NSGLLGALnDTmDK	High	117647249	N9(Deamidated); M12(Oxidation)	14.49	2	1465.69	5.7639
AATcInPLnGSVcERPAnHSAK	High	87299635	C4(Carbamidomethyl); N6(Deamidated); N9(Deamidated); C13(Carbamidomethyl); N18(Deamidated)	14.43	3	2370.12	14.3252
EELGVVVHEAPYSGSFTIEGnnSFAQR	High	112293279	N21(Deamidated); N22(Deamidated)	14.24	3	2940.39	13.7137
GVnVTmPSQPGVPPLSSTQLQIDPALQEFQLVDLSR	High	183979966	N3(Deamidated); M6(Oxidation);	14.05	3	3882.01	19.4172
TEAADLcQAFnSTLPTmDQmK	High	85540468	C7(Carbamidomethyl); N11(Deamidated); M17(Oxidation); M20(Oxidation)	14.02	2	2406.04	11.2709
IYNTPSASYLEVTPDSEnDFGNYncTAVNR	High	124517683	N18(Deamidated); N24(Deamidated); C25(Carbamidomethyl)	14.01	3	3413.48	1.84009
YQAQnFTLVcIVSGGKPAPmVYFK	High	38348466	N5(Deamidated); C10(Carbamidomethyl); M20(Oxidation)	13.98	3	2735.37	2.94778
LTcEcEHnTTGPDcGK	High	254039711	C3(Carbamidomethyl); C5(Carbamidomethyl); N8(Deamidated); C14(Carbamidomethyl)	13.86	3	1879.73	2.9009
WLLPnGTVLSHASR	High	124339785	N5(Deamidated)	13.81	2	1551.83	1.53399
AnSTGTLVITnPTR	High	227497226	N2(Deamidated); N11(Deamidated)	13.8	2	1446.76	14.6345
LLnTTDVYLLPSLnPDGFER	High	150378501	N3(Deamidated); N14(Deamidated)	13.79	2	2279.19	19.5267
SGQVEVnITEFPYTPTPEHGR	High	40254534	N7(Deamidated)	13.72	3	2359.13	2.96851
ENPGHIYNKnISQK	High	10092671	N10(Deamidated)	13.64	3	1642.82	1.55203
SmVDFmnTDnFTSHR	High	84370353	M2(Oxidation); M6(Oxidation); N7(Deamidated); N10(Deamidated)	13.52	3	1835.75	13.4275
WScDHKQnITYLLK	High	226874869	C3(Carbamidomethyl); N8(Deamidated)	13.46	3	1806.89	4.758
VEPSDVGnYTcFVTNK	High	31980846	N8(Deamidated); C11(Carbamidomethyl)	13.45	2	1830.84	8.36682
AVISmLnETmnEAPEETKIVIKK	High	7106409	M5(Oxidation); N7(Deamidated); M10(Oxidation); N11(Deamidated)	13.44	3	2622.35	10.388
GVnVTmPSQPGVPPLSSTQLQIDPALQEFQLVDLSR	High	183979966	N3(Deamidated); M6(Oxidation)	13.36	3	3881.01	14.0456
nGQGSNLDGGnYHVYEnGSLEIK	High	237858632;35215309	N1(Deamidated); N11(Deamidated); N17(Deamidated)	13.27	3	2469.08	5.96862
FEnQTcFPLPDSR	High	197333685	N3(Deamidated); C6(Carbamidomethyl)	13.26	2	1612.72	17.7147
LVGcPPGGAGGnDTELIAcLR	High	13928664	C4(Carbamidomethyl); N12(Deamidated); C19(Carbamidomethyl)	13.22	3	2128.02	2.03367
VAQPGInYALGTnTSYPnNLLR	High	30039682	N7(Deamidated); N13(Deamidated); N18(Deamidated)	13.11	2	2380.18	4.82945
SnYSVIDLTPVAAILPK	High	84872231	N2(Deamidated)	13.06	2	1802	3.39219
IFNIDSGnGSIFTSK	High	110347562	N8(Deamidated)	12.99	2	1600.79	-0.197104
DLQGnPIAnATISVDGIDHDVTSAK	High	22203763	N5(Deamidated); N9(Deamidated)	12.96	3	2553.26	12.4059
TSDTGEEEAITnSTEAnGKYVVVSTPEK	High	116014342	N12(Deamidated); N17(Deamidated)	12.87	3	2958.37	4.19643
QHTVTTTTKGEnFTETDVK	High	506326231	N12(Deamidated)	12.82	3	2139.03	9.62109
YnEVnITYSPSGLVTFIQR	High	7657413	N2(Deamidated); N5(Deamidated)	12.73	2	2203.12	12.7625
YIISPInGTVYLSEKDPVNTK	High	422744224	N7(Deamidated)	12.65	3	2352.24	3.05088
NGVTHnFAVTSVGGLPVnETTLAEVLR	High	261244940	N6(Deamidated); N18(Deamidated)	12.56	3	2797.45	3.79937
VLTLAnFTTKDEGDYFcELQVSGAnPmSSnK	High	6678347	N6(Deamidated); C17(Carbamidomethyl); N25(Deamidated); M27(Oxidation); N30(Deamidated)	12.52	3	3456.58	13.7634
QAALDPFVLQNLLPnSTDK	High	124486807	N15(Deamidated)	12.49	2	2085.1	6.02717
DmSQSIPIEDmLLQVSHYLnNSnR	High	254675312	M2(Oxidation); M11(Oxidation); N20(Deamidated); N23(Deamidated)	12.42	3	2838.33	12.08
NVAVTVEYGPSFEELGcPSnWTWVEGSGK	High	159110562	C17(Carbamidomethyl); N20(Deamidated)	12.3	3	3200.46	1.56884
GILnATLSVAEINHPVTTYK	High	150378501	N4(Deamidated)	12.29	3	2142.15	2.94028
LTFFnVSEHDYGnYTcVASnK	High	31982044	N5(Deamidated); N13(Deamidated); C16(Carbamidomethyl); N20(Deamidated)	12.25	3	2469.08	10.4259
SLDnDNYVFTAPYFnK	High	161086902	N4(Deamidated); N15(Deamidated)	12.24	2	1909.88	18.3779
VEFDDKGnVITSYGnPILLnSSIPEDATIK	High	6754900	N8(Deamidated); N15(Deamidated); N20(Deamidated)	12.12	3	3252.66	16.3973
ScVAITDAFPQnmSR	High	226958476	C2(Carbamidomethyl); N12(Deamidated); M13(Oxidation)	12.09	2	1713.76	1.90066
SVSVAAGDSTVLncTLTSLLPVGPIR	High	294997315	N13(Deamidated); C14(Carbamidomethyl)	11.96	3	2628.39	1.33553
nTTLYIDR	High	226958327	N1(Deamidated)	11.91	1	996.502	2.71257
FSILPmSHEImPGGnVnITcVAVGSPmPYVK	High	356995864	M6(Oxidation); M11(Oxidation); N15(Deamidated); N17(Deamidated); C20(Carbamidomethyl); M27(Oxidation)	11.81	3	3395.64	9.86547
TNIEGQVPFIPAnFTAHITPYK	High	84370361	N13(Deamidated)	11.69	3	2459.26	0.656247
nSSYFVEWIPNNVK	High	33859488;7106439;31981939;12963615	N1(Deamidated)	11.66	2	1697.82	-0.0442745
mYSEGSDIVPQSnETALHYFK	High	46309573	M1(Oxidation); N13(Deamidated)	11.57	3	2433.11	5.93023
KLVQVGIYnGTHVIPnDR	High	294997259	N9(Deamidated); N16(Deamidated)	11.18	3	2026.09	12.6823
YNAQPVGnWSDcILPEGK	High	259013354	N8(Deamidated); C12(Carbamidomethyl)	11.12	2	2048.94	2.96847
SDVPNTSPnSTSQHVAEFETER	High	124486807	N9(Deamidated)	11.07	3	2434.06	-0.222063
DGQELHPLETTVnPSGKnVSYnISSTVR	High	294997315	N13(Deamidated); N18(Deamidated); N22(Deamidated)	11.07	3	3046.5	15.6973
LRnPcTSEQncTSPFSYK	High	45504394	N3(Deamidated); C5(Carbamidomethyl); N10(Deamidated); C11(Carbamidomethyl)	10.9	2	2190.95	5.37222
TEQLIIQAPnTSVHIYEPYPAGADVPFGPPLNK	High	89242146	N10(Deamidated)	10.7	3	3578.84	10.6509
nYTWVPIR	High	291290989	N1(Deamidated)	10.65	2	1049.54	2.61995
AInQTAVEcIWTGPK	High	110625645	N3(Deamidated); C9(Carbamidomethyl)	10.56	2	1689.83	11.5024
VcTGnESLEENYVQDSK	High	166999785	C2(Carbamidomethyl); N5(Deamidated)	10.52	2	1972.85	4.29599
VmHGGAnITGFQIVnNENPmVQQFIQR	High	163792196	M2(Oxidation); N7(Deamidated); N15(Deamidated); M20(Oxidation)	10.5	3	3077.48	11.7321
GQVVTmDGTPLVGVnVSFVK	High	154090989	M6(Oxidation); N15(Deamidated)	10.5	2	2065.08	13.0023
QHTVTTTTKGEnFTETDVK	High	506326231	N12(Deamidated)	10.49	3	2138.03	2.60631
FLnVTPNVEVnVEcR	High	7242138	N3(Deamidated); N11(Deamidated); C14(Carbamidomethyl)	10.46	2	1791.89	15.6376
nnVTEIQGIPGAASGLIK	High	158711686	N1(Deamidated); N2(Deamidated)	10.31	2	1783.95	1.81267
GnYDFVEAmIVNnHTSLDVER	High	30520239	N2(Deamidated); M9(Oxidation); N13(Deamidated)	10.31	3	2441.12	12.7667
AYNSAGAGPFSATVnATTK	High	117938277	N15(Deamidated)	10.3	2	1828.88	4.67556
EGDnITLQcLGnGnPPPEEFmFYLPGQPEGIR	High	31791059	N4(Deamidated); C9(Carbamidomethyl); N12(Deamidated); N14(Deamidated); M21(Oxidation)	10.25	3	3609.66	14.3245
QEnISVGSVLLTVnATDPDSLQHQTIR	High	110625609	N3(Deamidated); N14(Deamidated)	10.19	3	2939.49	13.1915
